# Supplementary material
Source: PubMed Central journal article supplement (PMC3799000)
Supplement: supp_blood-2012-07-445635_blood-2012-07-445635-1.pdf [file supp_blood-2012-07-445635_blood-2012-07-445635-1.pdf]

**Supplementary Materials for**  
**BCL-2 inhibition with ABT-737 prolongs survival in an NRAS/BCL-2 mouse model of**  
**AML by targeting primitive LSK and progenitor cells**

Stephanie Beurlet, Nader Omidvar, Petra Gorombeï, Patricia Krief, Carole Le Pogam, Niclas Setterblad, Pierre de la Grange, Christophe Leboeuf, Anne Janin, Maria-Elena Noguera, Florence Hervatin, Laure Sarda-Mantel, Marina Konopleva, Michael Andreeff, Andrea W Tu, Alice C Fan, Dean W Felsher, Anthony Whetton, Marika Pla, Robert West, Pierre Fenaux, Christine Chomienne, Rose Ann Padua\*

\*To whom correspondence should be addressed. E-mail: [rose-ann.padua@inserm.fr](mailto:rose-ann.padua@inserm.fr)

**This pdf includes:**

Materials and Methods

References

Figs S1-S3

Table S1 Gene list

## **Materials and Methods**

### **Tissue and cell preparation, flow cytometry**

Blood was obtained from anaesthetized animals (with isoflurane) by venipuncture of retro-orbital venus plexus into EDTA tubes. Differential blood counts were obtained using an automated hematology analyzer (Cell Dyn, Abbott Diagnostics, France or Medonica, Kitvia, France). White peripheral blood (PB) cells were analyzed by flow cytometry as previously described<sup>1</sup> (FACSCalibur, Becton Dickinson, San Jose, California, USA ); PB BCL-2 expression was performed by flow cytometry using the human specific BCL-2 antibody (BD Pharmingen, San Diego, CA, USA). Bone marrow (BM) was obtained by flushing long bones with Hank's balanced salts solution followed by filtering through a nylon mesh. PB and BM smears were prepared according to standard hematological techniques. Bone marrow smears were stained and examined by a cytologist of Hôpital Saint-Louis. The tissue sections were examined by the Head of Histopathology of Hôpital Saint-Louis; and classified according to the Bethesda proposal<sup>2</sup> where blast equivalents are designated as "Immature Forms/Blasts", which for the purposes of convenience are referred to as blasts herein. Percentage blasts were determined from the BM smears by counting 100-200 cells. Lin<sup>-</sup> fractions were separated using an AutoMacs separator (Miltenyi, Auburn, CA). The lineage depletion kit contained a mixture of specific biotinylated antibodies CD5 (T-cell antigen), CD45R (lymphocyte antigen), Mac-1, Gr-1(Lys-6G) (granulo-macrophagic differentiation antigens) and Ter119 (early erythroid antigen). BM LSK cells were estimated using antibodies Sca-1 conjugated with fluorescent isothiocyanate (FITC) and KIT conjugated with phycoerythrin (PE) (Becton Dickinson, San Jose, CA). Livers and spleens were fixed overnight in buffered formalin and embedded in paraffin, sectioned and stained by the Hôpital Saint-Louis Histopathology department. Splenocytes were obtained by soft dilaceration of the spleen with the piston of a 5 ml Syringe in a petri dish. Cells are washed in PBS, filtered through a 40  $\mu$  m nylon mesh and then density centrifugation was conducted using Lymphoprep (Eurobio, France) to isolate mononuclear splenocytes.

### **Progenitor Assay**

Progenitor assays were performed using the Methocult® media as recommended by the manufacturer (Stem Cell Technology, Vancouver). This assay kit contained rm-Stem Cell Factor, rmlL-3, rhIL-6 growth factors and insulin and transferrin. Briefly  $10^6$  bone marrow cells were centrifuged and resuspended in 3.3 ml Iscove's media supplemented with 2% heat inactivated fetal calf serum (FCS), 2 mM glutamine, 5 UI/ml penicillin, 300 mg/ml streptomycin. 0.3 ml of cells was added to 3 ml of Methocult® and 1 ml ( $3 \times 10^4$ ) was plated per 35 mm dish (in triplicate). Cultures were incubated for 7 days at 37°C, 5% CO<sub>2</sub> in air and > 95% humidity. Identification and counts of colonies were done according to the technical manual of the manufacturer. Colonies were counted on day 7 and the mean of the first two dishes plated was scored.

### **Immunofluorescence and confocal microscopy**

A TRITC directly conjugated hBCL-2 (Santa Cruz Biotechnology, CA), an anti-NRAS monoclonal antibody was visualized with a goat anti-mouse Alexa 647 secondary antibody and anti-mitochondria antibody Tom 20 (Santa Cruz Biotechnology, CA) visualized with a goat anti-rabbit Alexa 488 secondary antibody were used. The fluorescent lectin (Alexa Fluor 488) wheat germ agglutinin (Molecular Probes, Invitrogen, Paisley) was used as a plasma membrane marker for mouse cells. Slides were analyzed by confocal microscopy on a Zeiss LSM 510 META confocal laser microscope (Zeiss, Jena, Germany).

### **Flow cytometric apoptosis assessment:AnnexinV/7AAD**

Briefly, single cell suspensions were prepared from spleen cells and cultured in low-serum/cytokine mixture (IMDM/2% FCS/IL-3/SCF/G-CSF/GM-CSF (5 ng/ml)) for 24 h as recommended by the manufacturer (BD Biosciences, Oxford, UK).  $3 \times 10^5$  cells were

collected by centrifugation and labelled with Annexin V-Cy5 (BioVision Inc, CA) and 7-AAD (BD Biosciences, Oxford, UK) according to manufacturers' instructions.

### **Mitochondrial membrane potential (MMP)**

Briefly, splenocytes were resuspended at  $1 \times 10^6$ /ml in 1xPBS with 50 nM DiOC<sub>2</sub>(3) (Invitrogen, Carlsbad, CA) and incubated at 37°C for 30 min. Cells were washed in 1xPBS and analysed by flow cytometry using the 488 nm excitation laser and 530/30 nm bandpass and 670 nm longpass filters. The accumulation of the DiOC<sub>2</sub>(3) dye within the mitochondria measured by emission in the green/red channels following excitation reflects the membrane potential.

### ***ANX-Scintigraphy***

Scintigraphic imaging or Single-Photon Emission Computed Tomography (SPECT) was performed under pentobarbital anesthesia (4 mg/100 g body weight; Ceva Santé Animale, Libourne, France) in mice, after intravenous injection of ANX. Planar images were obtained 0 to 45 minutes (dynamic acquisition: 15 images, image duration: 60 seconds, static acquisitions of 10 minutes duration) after ANX injection. Images were acquired 10 minutes after injected dose of ANX. In addition, mice which had previously undergone planar imaging underwent abdominal X/tomosintigraphy acquisition: mod-list tomographic acquisition was performed during continuous rotation of the animal placed between 2 parallel collimators (360° rotation per minute, acquisition duration: 60 minutes from 1 hour to 2 hours after ANX injection). All acquisitions were performed using a dedicated small animal IMAGER-S/CT system (Biospace Mesures, Paris, France) equipped with parallel low-energy high-resolution collimators (matrix 128x128, 15% energy window centred on 140 KeV). ANX uptake in hepato-splenic area was visually assessed, and activity (mean counts per pixel) ratios between pre and post treatment (determined on early dynamic images) and underlying background areas were computed on planar images.

## **TUNEL**

Quantitative data on tissue sections were assessed blindly by 2 pathologists (AJ, CL) on an Olympus ProvisAX-70 microscope (Olympus, Japan), with wide-field eyepiece number 26.5, providing a field size of 0.344 mm<sup>2</sup> at 400× magnification. Cell counts were performed on three different fields per section, and expressed as the mean number of cells per field (400 × magnification) using the Olympus SIS software system.

## **RAS activation assays and Western Blotting**

5x10<sup>5</sup> cells were lysed in 50 mmol/L Tris (pH 7.4), 1% NP40, 15% glycerol, 200 mmol/L NaCl, 5 mmol/L MgCl<sub>2</sub>, 5 mmol/L NaF, 1 μmol/L leupeptin, 0.1 μmol/L aprotinin, and 1 mmol/L phenylmethylsulfonyl fluoride. Detergent-insoluble material was removed by centrifugation (16,000 g at 4°C for 20 min) and assayed for RAS activation using the GST-Raf1-Ras Binding Domain protein as previously described.<sup>2</sup> Densitometric analysis for the pulldowns was performed using the Aida Image Analyzer. The background was subtracted, and the signals of the detected bands were normalized to the amount of respective β-actin loading control band. The relative values were presented as fold increase over control samples as indicated (error bar = SD; n=3). For Western blots Cyclin D1 and D3, p27<sup>KIP1</sup>, Phospho p38<sup>MAPK</sup>, BCL<sub>XL</sub>, pBCL-2 threonine and serine antibodies were obtained from Cell Signaling Technology, Beverly, MA); p21<sup>Waf1/Cip1</sup>, p15<sup>INK4B</sup>, MCL-1, ERK and AKT specific antibodies were obtained from Santa Cruz Biotechnology, CA,

## **Effect of ABT-737 on AML spleen cells *Ex Vivo***

Splenocytes were prepared as above, resuspended at 1x10<sup>6</sup>/ml in culture media (IMDM/2% FCS/IL-3/SCF/G-CSF/GM-CSF (5 ng/ml) with 10, 100 or 500 nM of ABT-737 dissolved in DMSO and incubated at 37°C for 24 hours. Cells were washed in 1xTBS and analysed by Western blotting using ppERK and pAKT antibodies with β-actin as a control for loading (Cell Signaling Technology, Beverly, MA).

### **Affymetrix exon array hybridization**

For each of the six arrays (three mice each of untreated and ABT-737 treated <sub>MRP8</sub>[NRAS/BCL-2] mice), 100 ng of total RNA was first mixed with bacterial transcripts and the mixture was reverse transcribed into cDNA. After synthesis of double-stranded cDNA, an *in vitro* transcription reaction was conducted overnight. Resulting amplified cRNA were reverse transcribed into sense DNA incorporating dUTP. This single stranded DNA was treated with a combination of uracil DNA glycosylase and apurinic/apyrimidinic endonuclease 1. DNA fragments were biotin-labeled by terminal deoxynucleotidyl transferase. Targets were finally prepared according Affymetrix recommendations for hybridization of exon arrays. Microarrays were hybridized, washed and scanned using Affymetrix instruments. Total RNAs RIN values were between 8.3 and 9. Raw data are controlled with Expression console (Affymetrix).

### **Array data and statistical analysis**

Exon Array data were normalized using quantile normalization. Background correction was made by using the antigenomic probes and probe selection was made as described previously.<sup>3</sup> Only probes targeting exons annotated from FAST DB® transcripts were selected in order to focus on well-annotated genes, whose mRNA sequences are in public databases.<sup>4</sup> Among these selected probes, bad-quality probes (e.g. probes identified by Affymetrix as “cross-hybridizing”) and probes with too low intensity signal compared to antigenomic background probes with the same GC content were removed from the analysis. Only probes with a DABG P value  $\leq 0.05$  in at least half of the arrays were considered for statistical analysis.<sup>4</sup> Only genes expressed in at least one compared condition were analyzed (*i.e.* untreated and ABT-737 treated mice). To be considered as expressed, the DABG p-value had to be  $\leq 0.05$  for at least half of the gene probes. We performed an unpaired Student's t-test to compare gene intensities in the different biological replicates.

## Reference

1. Omidvar N, Kogan S, Beurlet S et al. BCL-2 and mutant NRAS interact physically and functionally in a mouse model of progressive myelodysplasia. *Cancer Res* 2007;67:11657-11667.
2. Kogan SC, Ward JM, Anver MR et al. Bethesda proposals for classification of nonlymphoid hematopoietic neoplasms in mice. *Blood* 2002;100:238-245.
3. de la Grange P, Gratadou L, Delord M, Dutertre M, Auboeuf D. Splicing factor and exon profiling across human tissues. *Nucleic Acids Res* 2010;38:2825-2838.
4. de la Grange P, Dutertre M, Martin N, Auboeuf D. FAST DB: a website resource for the study of the expression regulation of human gene products. *Nucleic Acids Res* 2005;33:4276-4284.

# Figure S1

Increased weight of AML mice after ABT-737 treatment

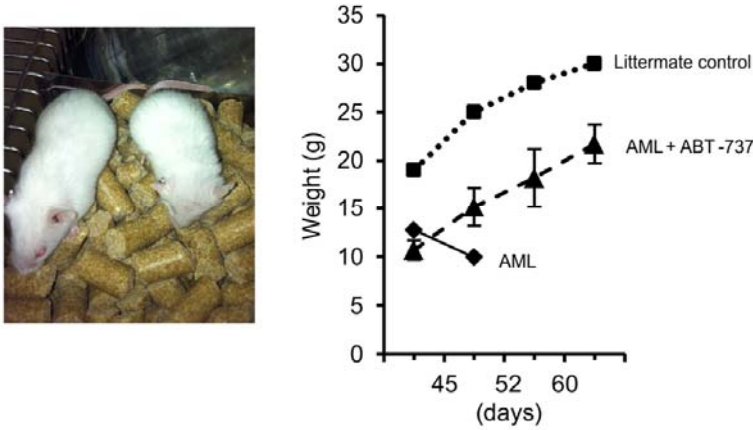

Reduced size of AML compared to littermate. AML mouse on the right with wild-type littermate on the left and increased weight of AML mice after treatment. Weight of AML mice at 3 weeks (Mean $\pm$ SD of 3 mice) of untreated diseased mice (closed diamond and solid line) compared to litter mate (n=3, closed square and small dotted line) and treated mice (n=6, closed triangle and dashed line).

# Figure S2

Kaplan-Meier survival curves showing prolonged survival of AML mice treated with ABT-737

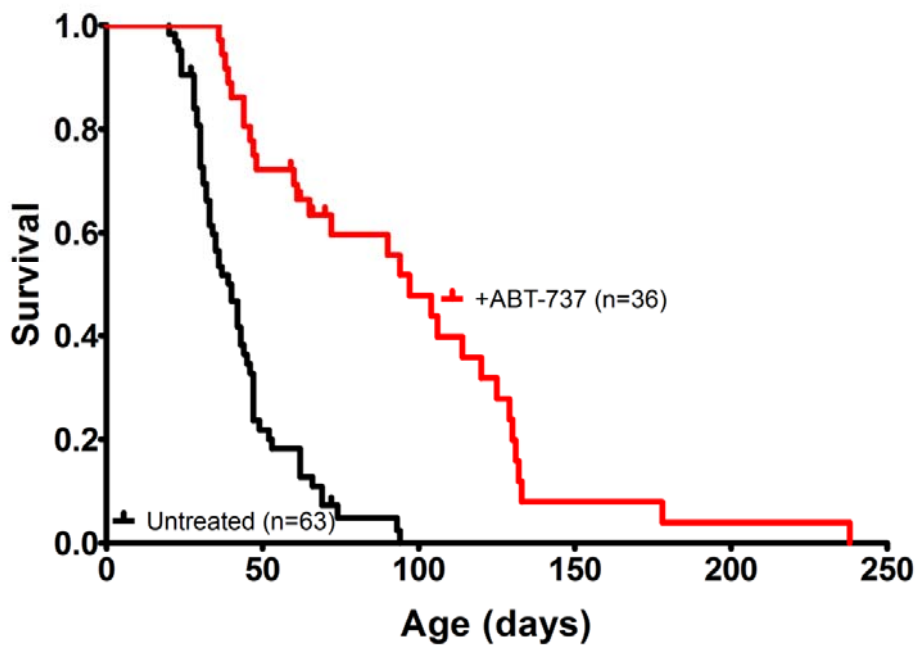

Treated mice (n=36, red line) compared with untreated (n=63, black line) plotted from date of birth ( $p < 0.0001$ ).



Supplement S3. Radioisotope heat map of Tc-99 m labelled Annexin-V

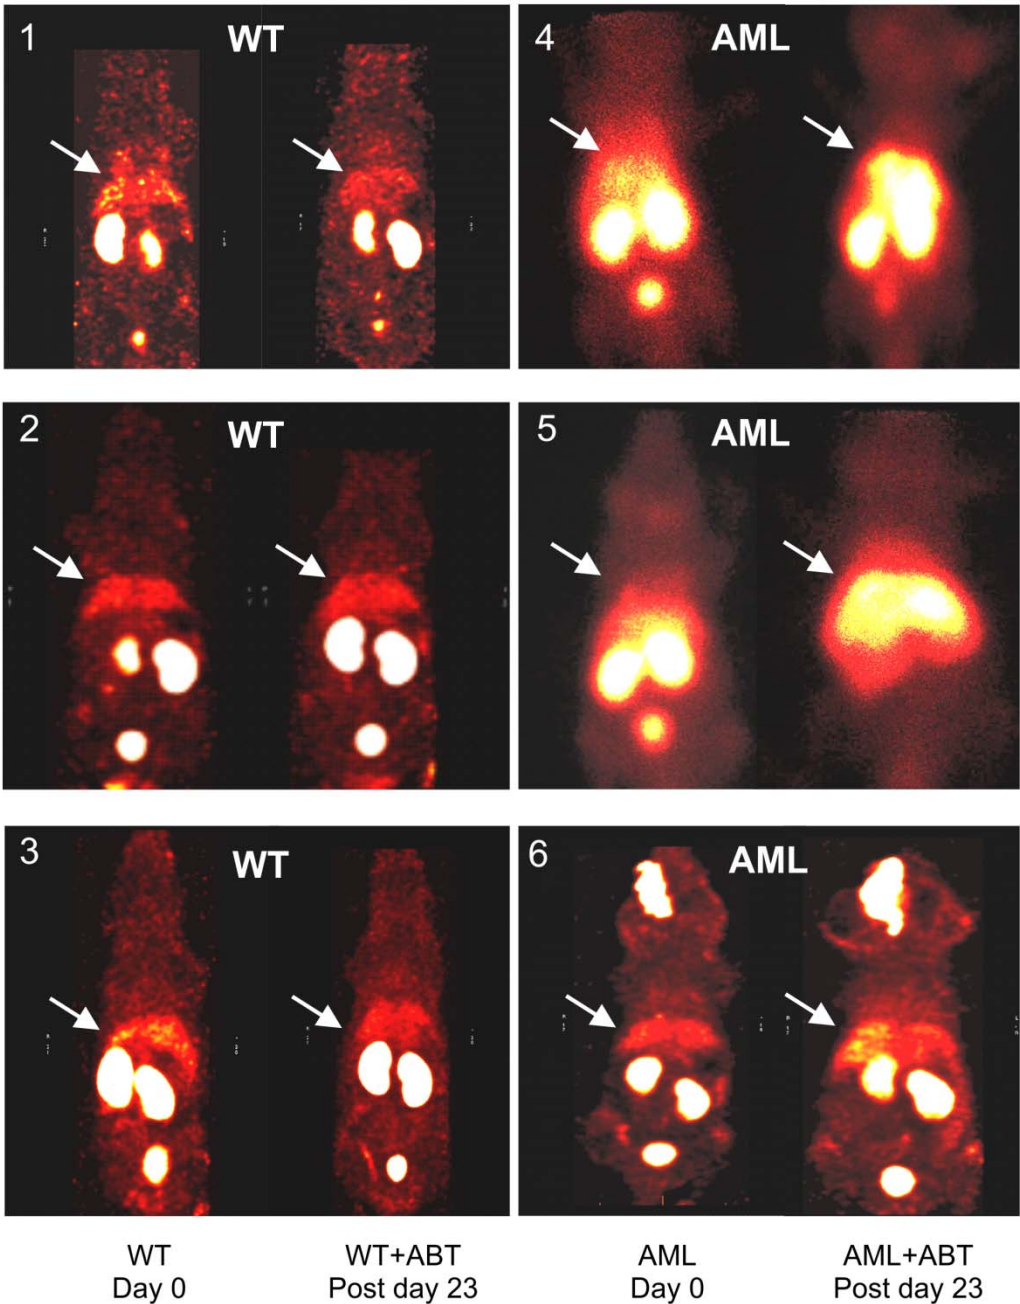

Increased apoptosis of AML treated mice. Paired untreated and treated radioisotope heat maps of Tc-99m labeled Annexin-V of AML and WT mice (n=3 in each group).

Supplementary Table S1. List of the 997 Regulated Genes of AML mice treated with ABT-737(Fold-change  $\geq 1.5$ ; P-Value  $\leq 0.05$ ); 764 upregulated and 233 downregulated genes.

GEO Accession No.: GSE48601

| Gene Symbol      | Regulation | Fold-Change | P-Value  | Gene Coordinates (hg19)      | UCSC Link            | Gene Name                                      | Aliases and Synonyms                      | Representative Transcript ID | Entrez Gene ID  | Ensembl ID            | Intensity NRAS-BCL2 | Intensity NRAS-BCL2 ABT-737 |
|------------------|------------|-------------|----------|------------------------------|----------------------|------------------------------------------------|-------------------------------------------|------------------------------|-----------------|-----------------------|---------------------|-----------------------------|
| Mmp9             | up         | 7.50        | 3.48E-03 | chr2(+):16477370-1648781348  | <a href="#">UCSC</a> | matrix metalloproteinase 9                     | BMP9 // C1ql4b // GelatinaseB             | D12712                       | 17395           | ENSMUSG00000017737    | 9.57                | 12.47                       |
| Fpr1             | up         | 7.39        | 3.10E-03 | chr17(-):18013452-18020905   | <a href="#">UCSC</a> | formyl peptide receptor 1                      | MLF-R // FPR                              | AK137714                     | 14293           | ENSMUSG00000046551    | 7.92                | 10.80                       |
| Sf1a3            | up         | 6.73        | 1.54E-02 | chr16(+):36450623-36455480   | <a href="#">UCSC</a> | stefin A3                                      | Sf3                                       | AK014349                     | 20863           | ENSMUSG000000054908   | 8.57                | 11.32                       |
| Cxcr2            | up         | 6.57        | 2.85E-02 | chr11(+):116991960-116992772 | <a href="#">UCSC</a> | chemokine (C-X-C motif) receptor 2             | CD128 // Cmrk2 // Gpcr16 // IL-8 receptor | BC104141                     | 104141          | ENSMUSG00000026180    | 7.22                | 9.94                        |
| Il1f9            | up         | 6.23        | 6.12E-03 | chr2(+):24041999-24054734    | <a href="#">UCSC</a> | interleukin 1 family, member 9                 | IL1F9                                     | AK156687                     | 21257           | ENSMUSG000000044103   | 8.98                | 11.62                       |
| Tm4sf1           | up         | 6.22        | 3.68E-02 | chr3(-):57089533-57105892    | <a href="#">UCSC</a> | transmembrane 4 superfamily member 1           | 12A2targetantigen // L6 // L6antigen      | AK134603                     | 17112           | ENSMUSG000000027800   | 7.54                | 10.18                       |
| Igll1            | up         | 6.15        | 3.62E-02 | chr16(+):16860767-16864079   | <a href="#">UCSC</a> | immunoglobulin lambda 5                        | Igll-5 // Igll // Lambd5                  | AK137552                     | ---             | ENSMUSG000000075370   | 7.48                | 10.10                       |
| Dhrs9            | up         | 6.14        | 1.36E-02 | chr2(+):69218500-69242590    | <a href="#">UCSC</a> | dehydrogenase/reductase                        | C730025I08Rik // Rdh15                    | AK080914                     | 241452          | ENSMUSG000000027068   | 6.98                | 9.60                        |
| Irg1             | up         | 5.92        | 4.02E-03 | chr14(+):103446192-103455790 | <a href="#">UCSC</a> | immunoreactive protein 1                       | IRG1                                      | AK152635                     | 16365           | ENSMUSG000000022126   | 7.14                | 9.71                        |
| Mmp8             | up         | 5.55        | 1.10E-02 | chr9(+):7558448-7558486      | <a href="#">UCSC</a> | matrix metalloproteinase 8                     | Collagenase-2                             | AK089336                     | 17394           | ENSMUSG000000058000   | 8.55                | 11.02                       |
| Tnfrsf23         | up         | 5.22        | 2.20E-03 | chr7(-):150851714-150871781  | <a href="#">UCSC</a> | tumor necrosis factor receptor 25              | mDcTrailr1 // mSOB // Tnfrsf1             | AK170037                     | 79201           | ENSMUSG000000037613   | 7.38                | 9.76                        |
| Sfn4             | up         | 5.16        | 1.28E-02 | chr11(+):8298868-83003717    | <a href="#">UCSC</a> | schlafen 4                                     | Sfn4                                      | BC044865                     | 20558           | ENSMUSG000000002024   | 8.78                | 11.08                       |
| Gm5483           | up         | 5.13        | 2.63E-02 | chr16(+):36184298-36188194   | <a href="#">UCSC</a> | predicted gene 5483                            | ---                                       | AK089257                     | 433016          | ENSMUSG000000079597   | 7.37                | 9.73                        |
| Sic7a11          | up         | 4.96        | 5.96E-03 | chr3(-):49696447-50247536    | <a href="#">UCSC</a> | solute carrier family 7 member 1               | 993009M05Rik // sut // Systemc            | AJ766237                     | 28570           | ENSMUSG000000027737   | 7.76                | 10.07                       |
| Ccl2             | up         | 4.95        | 3.48E-03 | chr11(+):81849077-81850954   | <a href="#">UCSC</a> | chemokine (C-C motif) ligand 2                 | CCl2 // MCP-1                             | AK153520                     | 20296           | ENSMUSG000000035385   | 7.81                | 10.12                       |
| Cxcl2            | up         | 4.89        | 1.21E-02 | chr5(+):91332896-91334964    | <a href="#">UCSC</a> | chemokine (C-X-C motif) ligand 2               | CINC-2a // Gro2 // GROb // Mgsa           | AK155874                     | 20310           | ENSMUSG000000058427   | 9.92                | 12.21                       |
| D730048J04Rik    | up         | 4.88        | 5.12E-03 | chr17(+):43671137-43672050   | <a href="#">UCSC</a> | RIKEN cDNA D73004                              | ---                                       | AK021352                     | ---             | ---                   | 6.67                | 8.96                        |
| Pad14            | up         | 4.79        | 1.92E-02 | chr4(+):140301607-140330119  | <a href="#">UCSC</a> | peptidyl arginase domain containing protein 14 | PADtypeIV // Pd14                         | AK137625                     | 18602           | ENSMUSG000000025330   | 6.97                | 9.23                        |
| ---              | ---        | 4.61        | 3.84E-02 | chr6(+):69327937-69328199    | <a href="#">UCSC</a> | ---                                            | ---                                       | ---                          | ---             | ---                   | 6.14                | 11.35                       |
| ---              | ---        | 4.47        | 1.74E-02 | chr6(+):67741219-677741492   | <a href="#">UCSC</a> | ---                                            | ---                                       | ---                          | ---             | ---                   | 8.15                | 10.31                       |
| Retnlg           | up         | 4.47        | 3.47E-02 | chr16(+):48872757-48874609   | <a href="#">UCSC</a> | resistin like gamma                            | Fizz3 // Relmg // Xcp1                    | AJ536019                     | 245195          | ENSMUSG000000022651   | 10.39               | 12.55                       |
| 1700047M11Rik    | up         | 4.45        | 3.65E-02 | chr1(+):184218245-184233420  | <a href="#">UCSC</a> | RIKEN cDNA 170004                              | ---                                       | AK047804                     | 67330           | ---                   | 6.73                | 8.88                        |
| Alox5            | up         | 4.41        | 2.51E-02 | chr6(+):11636098-116411163   | <a href="#">UCSC</a> | arachidonate 5-lipoxygenase                    | 5-LO // 5-LOX // 5LO // 5LX               | AK136868                     | 11689           | ENSMUSG000000025701   | 8.88                | 11.02                       |
| Aspr1            | up         | 4.40        | 3.79E-02 | chr6(+):86577432-86579197    | <a href="#">UCSC</a> | aspartic peptidase, related                    | 2300003F22Rik // SASP // SASF             | BC157058                     | 67855           | ENSMUSG000000033508   | 7.13                | 9.27                        |
| Spp1             | up         | 4.32        | 1.38E-02 | chr5(+):104864136-104870667  | <a href="#">UCSC</a> | secreted phosphoprotein 1                      | SPPL1 // 44kDaBonephosphoprotein          | AK160540                     | 20750           | ENSMUSG000000029304   | 9.58                | 11.69                       |
| ---              | ---        | 4.27        | 2.56E-02 | chr7(+):150735217-150735792  | <a href="#">UCSC</a> | ---                                            | ---                                       | ---                          | ---             | ---                   | 6.44                | 8.53                        |
| S100a6           | up         | 4.20        | 1.08E-02 | chr3(+):90417104-90418336    | <a href="#">UCSC</a> | S100 calcium binding protein 6                 | 2A9 // 5B10 // Cacy // CALCYCL            | AK151144                     | 20200           | ENSMUSG00000001025    | 9.19                | 11.26                       |
| Upp1             | up         | 4.18        | 1.17E-02 | chr11(+):9018105-9036172     | <a href="#">UCSC</a> | uridine phosphorylase                          | UdrPase // Up // Ulpase                   | D44464                       | 22271           | ENSMUSG000000020407   | 7.55                | 9.62                        |
| Myo1d            | up         | 4.13        | 1.68E-02 | chr11(+):80295629-80593528   | <a href="#">UCSC</a> | myosin I                                       | 9930104H07Rik // D11Etd9e                 | BC039700                     | 338367          | ENSMUSG000000035441   | 7.22                | 9.27                        |
| Clec4d           | up         | 4.12        | 1.18E-02 | chr6(+):123212127-123225283  | <a href="#">UCSC</a> | C-type lectin domain family 4 member 4         | Clec4d // mcl // mMCL // Mpl              | AK089500                     | 17474           | ENSMUSG000000030144   | 7.00                | 9.04                        |
| Gm5416           | up         | 4.11        | 1.70E-02 | chr16(+):36210490-36217874   | <a href="#">UCSC</a> | predicted gene 5416                            | ---                                       | BC115936                     | 408196          | ENSMUSG000000068320   | 5.42                | 7.45                        |
| Fosl1            | up         | 4.02        | 3.13E-02 | chr19(+):5447545-5445945     | <a href="#">UCSC</a> | fos-like antigen 1                             | fra-1 // Fra1                             | AK144785                     | 14283           | ENSMUSG000000024912   | 7.75                | 9.76                        |
| Steap4           | up         | 3.94        | 1.36E-02 | chr5(+):7960455-7982212      | <a href="#">UCSC</a> | STEAP family member 4                          | 11100221017Rik // Tiarp // Tnfrap         | AJ319746                     | 117167          | ENSMUSG000000012428   | 6.14                | 8.12                        |
| Hdc              | up         | 3.94        | 1.44E-02 | chr2(+):126419398-126444416  | <a href="#">UCSC</a> | histidine decarboxylase                        | Hdc-a // Hdc-c // Hdc-e // Hdc-f          | AK133455                     | 15186           | ENSMUSG000000027369   | 8.23                | 10.20                       |
| Mmp25            | up         | 3.94        | 3.51E-02 | chr17(-):23766146-23782237   | <a href="#">UCSC</a> | matrix metalloproteinase 25                    | F730048C11Rik // Leukolysin // Bst1       | BC059599                     | 240047          | ENSMUSG000000023903   | 8.43                | 10.40                       |
| Bst1             | up         | 3.92        | 3.32E-03 | chr4(+):44210147-44234550    | <a href="#">UCSC</a> | bone marrow stromal cell protein 1             | 1141A10 // Bp3 // Bst1 // CD157           | AK163542                     | 12182           | ENSMUSG000000029802   | 10.11               | 10.41                       |
| ---              | ---        | 3.90        | 2.62E-02 | chr12(+):8506232-8509364     | <a href="#">UCSC</a> | ---                                            | ---                                       | ---                          | ---             | ---                   | 5.26                | 7.22                        |
| ---              | ---        | 3.88        | 3.81E-02 | chr5(+):44175285-44177356    | <a href="#">UCSC</a> | ---                                            | ---                                       | ---                          | ---             | ---                   | 5.98                | 7.94                        |
| Mctp1            | up         | 3.88        | 2.42E-02 | chr13(+):76522407-77171071   | <a href="#">UCSC</a> | multiple C2 domains                            | 2810465F10Rik                             | AK047562                     | 78771           | ENSMUSG000000021596   | 6.79                | 8.74                        |
| Chst1            | up         | 3.86        | 3.14E-02 | chr2(+):92440029-92455407    | <a href="#">UCSC</a> | carbohydrate (keratan) 6-O-sulfotransferase 1  | 2610008E20Rik // C6St // GST-1            | AK134997                     | 76969           | ENSMUSG000000027221   | 6.82                | 8.77                        |
| ---              | ---        | 3.82        | 2.56E-03 | chr17(-):74226579-74229003   | <a href="#">UCSC</a> | ---                                            | ---                                       | ---                          | ---             | ---                   | 6.42                | 8.35                        |
| Lilra6           | up         | 3.78        | 2.72E-03 | chr7(-):3859882-3867107      | <a href="#">UCSC</a> | leukocyte immunoglobulin-like receptor 6       | 7M1 // Pira3                              | AK030846                     | 18726           | ENSMUSG000000030427   | 7.83                | 9.75                        |
| Niacr1           | up         | 3.76        | 6.26E-03 | chr5(+):124313581-124315509  | <a href="#">UCSC</a> | niacin receptor 1                              | Gpr109a // Gpr109b // HM74 // P1          | AK150795                     | 80885           | ENSMUSG000000045052   | 8.24                | 10.15                       |
| Ilim6            | up         | 3.70        | 3.53E-02 | chr7(+):148201605-148202807  | <a href="#">UCSC</a> | interferon induced transmembrane protein 6     | fractiligin5                              | AK039626                     | 213002          | ENSMUSG000000059108   | 10.35               | 12.24                       |
| 6430548M08Rik    | up         | 3.68        | 2.43E-02 | chr8(+):122638050-122699204  | <a href="#">UCSC</a> | RIKEN cDNA 643054                              | mKIAA0513                                 | AK133157                     | 234797          | ENSMUSG000000031824   | 6.70                | 9.94                        |
| A430107O13Rik    | up         | 3.65        | 4.56E-02 | chr6(+):21935907-22205365    | <a href="#">UCSC</a> | RIKEN cDNA A43010                              | ---                                       | BC151918                     | 214682          | ENSMUSG000000062390   | 6.70                | 8.67                        |
| Ankrd22          | up         | 3.61        | 3.85E-02 | chr19(+):34197039-3420545    | <a href="#">UCSC</a> | ankyrin repeat domain containing protein 22    | S430429D21Rik // D19Etd675e               | AK101360                     | 52024           | ENSMUSG000000024774   | 5.51                | 7.35                        |
| ---              | ---        | 3.58        | 1.14E-02 | chr19(+):10013755-10015142   | <a href="#">UCSC</a> | ---                                            | ---                                       | ---                          | ---             | ---                   | 5.51                | 7.35                        |
| D930030O5Rik     | up         | 3.53        | 3.46E-03 | chr7(+):75251581-75258241    | <a href="#">UCSC</a> | RIKEN cDNA D93003                              | ---                                       | AK083489                     | ---             | ---                   | 7.24                | 9.06                        |
| Itpb2l           | up         | 3.51        | 3.55E-02 | chr16(+):96643898-96665222   | <a href="#">UCSC</a> | integrin beta 2-like                           | 5033406G21Rik // pactolus                 | AK158108                     | 16415           | ENSMUSG000000001557   | 7.10                | 8.91                        |
| Pygl             | up         | 3.41        | 2.27E-02 | chr12(-):71291799-71332475   | <a href="#">UCSC</a> | liver glycogen phosphorylase                   | ---                                       | AK149491                     | 110095          | ENSMUSG000000021069   | 8.29                | 10.06                       |
| Il1r2            | up         | 3.41        | 1.76E-02 | chr4(+):40141586-40182068    | <a href="#">UCSC</a> | interleukin 1 receptor, type I                 | CD121b // IL-1receptorbetachain           | AK132264                     | 16178           | ENSMUSG000000026073   | 8.58                | 10.35                       |
| Raet1d // Raet1e | up         | 3.38        | 2.53E-02 | chr10(+):21878373-22093943   | <a href="#">UCSC</a> | retinoic acid early transcription factor 1     | RAE-1delta // Rae-1epsilon                | FJ594066                     | 379043 // 56554 | 0000053219 // ENSMUSG | 6.89                | 8.65                        |
| Csf3r            | up         | 3.36        | 2.40E-02 | chr4(+):125701903-125722219  | <a href="#">UCSC</a> | colony stimulating factor 3 receptor           | Cd114 // Csfgr // G-CSFR                  | AK144318                     | 12986           | ENSMUSG000000028859   | 9.05                | 10.80                       |
| Rasgrp4          | up         | 3.35        | 1.77E-02 | chr7(+):29919950-29938971    | <a href="#">UCSC</a> | RAS guanyl releasing factor                    | ---                                       | AK089282                     | 233046          | ENSMUSG000000030589   | 8.59                | 10.33                       |
| ---              | ---        | 3.33        | 4.62E-02 | chr6(+):129453790-129456461  | <a href="#">UCSC</a> | ---                                            | ---                                       | AK080920                     | ---             | ---                   | 6.84                | 8.57                        |
| Sifa1            | up         | 3.32        | 2.38E-02 | chr16(+):36217265-36285457   | <a href="#">UCSC</a> | stefin A1                                      | Sf1                                       | M92417                       | 20861           | ENSMUSG000000017562   | 10.68               | 12.41                       |
| Sf1a21           | up         | 3.30        | 2.21E-02 | chr16(+):36156896-36162038   | <a href="#">UCSC</a> | stefin A2 like 1                               | ---                                       | AK050597                     | 268895          | ENSMUSG000000059657   | 9.61                | 11.33                       |
| ---              | ---        | 3.29        | 8.12E-03 | chr11(+):74290802-74293812   | <a href="#">UCSC</a> | ---                                            | ---                                       | ---                          | ---             | ---                   | 6.87                | 8.59                        |
| ---              | ---        | 3.26        | 1.19E-02 | chr19(+):10056413-10056981   | <a href="#">UCSC</a> | ---                                            | ---                                       | ---                          | ---             | ---                   | 6.02                | 7.73                        |
| Thbs1            | up         | 3.24        | 4.96E-02 | chr2(+):117937624-117952868  | <a href="#">UCSC</a> | thrombospondin 1                               | tbsp1 // Thbs-1 // TSP-1 // TSP1          | AK145202                     | 21825           | ENSMUSG000000040152   | 8.86                | 10.56                       |
| Actn1            | up         | 3.24        | 6.32E-03 | chr12(+):81288535-81361352   | <a href="#">UCSC</a> | actinin, alpha 1                               | 3110023F10Rik                             | BC054830                     | 109711          | ENSMUSG000000015143   | 8.94                | 10.64                       |
| Arg2             | up         | 3.23        | 1.11E-02 | chr12(+):80231803-80257287   | <a href="#">UCSC</a> | arginase type II                               | All                                       | U90886                       | 11847           | ENSMUSG000000021125   | 6.90                | 8.59                        |
| ---              | ---        | 3.22        | 2.57E-02 | chr11(+):107289590-107297000 | <a href="#">UCSC</a> | ---                                            | ---                                       | ---                          | ---             | ---                   | 6.07                | 7.76                        |
| Hal              | up         | 3.19        | 4.53E-02 | chr10(+):92951513-92979506   | <a href="#">UCSC</a> | histidine ammonia lyase                        | histidase // Hsd                          | AK146139                     | ---             | ---                   | 6.07                | 7.76                        |
| ---              | ---        | 3.19        | 3.15E-02 | chr7(+):50779586-50781749    | <a href="#">UCSC</a> | ---                                            | ---                                       | ---                          | ---             | ---                   | 6.75                | 9.43                        |
| ---              | ---        | 3.16        | 4.52E-02 | chr17(+):48286076-48304221   | <a href="#">UCSC</a> | RIKEN cDNA A53006                              | ---                                       | AK174433                     | ---             | ---                   | 8.76                | 10.43                       |
| Fpr2 // Fpr3     | up         | 3.14        | 1.44E-02 | chr17(+):18024786-18103641   | <a href="#">UCSC</a> | formyl peptide receptor 2                      | E330010I07Rik // Fpr-rs1 // Fpr-r         | AK174433                     | 328830          | ENSMUSG000000043938   | 7.86                | 9.52                        |
| F2r2             | up         | 3.13        | 2.20E-02 | chr13(+):96466808-96472694   | <a href="#">UCSC</a> | coagulation factor II                          | PAR3                                      | 14289 // 14294               | 14289 // 14294  | 0000052270 // ENSM    |                     |                             |

Supplementary Table S1. List of the 997 Regulated Genes of AML mice treated with ABT-737(Fold-change  $\geq 1.5$ ; P-Value  $\leq 0.05$ ); 764 upregulated and 233 downregulated genes.

GEO Accession No.: GSE48601

| Gene Symbol           | Regulation | Fold-Change | P-Value  | Gene Coordinates (hg19)       | UCSC Link | Gene Name                | Aliases and Synonyms                 | Representative Transcript ID | Entrez Gene ID | Ensembl ID         | Intensity NRAS-BCL2 | Intensity NRAS-BCL2 ABT-737 |
|-----------------------|------------|-------------|----------|-------------------------------|-----------|--------------------------|--------------------------------------|------------------------------|----------------|--------------------|---------------------|-----------------------------|
| 493341206Rik          | up         | 3.02        | 2.92E-02 | chr13(-):15873497-15894465    | UCSC      | RIKEN cDNA 493341        | ---                                  | AK016796                     | ---            | ---                | 5.45                | 7.04                        |
| Tamr1                 | up         | 2.98        | 4.19E-02 | chr7(-):3487791-3503442       | UCSC      | T cell-interacting, acti | 9930022N03Rik // Gm9904              | AK155804                     | 245126         | ENSMUSG00000053338 | 7.70                | 9.28                        |
| Ptgs2                 | up         | 2.97        | 8.92E-03 | chr1(+):151947229-151955147   | UCSC      | prostaglandin-endope     | Cox-2 // COX2 // cyclooxygenase      | M88242                       | 19225          | ENSMUSG00000032487 | 7.82                | 9.39                        |
| Pt2a5                 | up         | 2.96        | 4.61E-02 | chr4(-):138355159-138419383   | UCSC      | phospholipase A2, gr     | PLA2                                 | AK090021                     | 18784          | ENSMUSG00000041193 | 6.08                | 7.65                        |
| 9830107182Rik         | up         | 2.89        | 3.70E-02 | chr17(+):48282355-48283218    | UCSC      | RIKEN cDNA 983010        | ---                                  | AK079388                     | 328829         | ENSMUSG00000073386 | 7.65                | 8.57                        |
| ---                   | up         | 2.89        | 2.15E-02 | chr15(+):82823800-82828136    | UCSC      | ---                      | ---                                  | AK158337                     | ---            | ---                | 8.86                | 10.40                       |
| Trem1                 | up         | 2.87        | 4.87E-02 | chr17(+):48371933-48386091    | UCSC      | triggering receptor exc  | ---                                  | AK089439                     | ---            | ---                | 9.40                | 10.92                       |
| Wip1                  | up         | 2.86        | 4.98E-02 | chr1(-):109434646-109472747   | UCSC      | WD repeat domain, p      | 49305330H1Rik // D11Erd498e          | AK159808                     | 52639          | ENSMUSG00000041895 | 6.96                | 8.47                        |
| Mt2                   | up         | 2.85        | 1.22E-02 | chr8(+):9696683-9697462       | UCSC      | metallothionein 2        | Mt-2 // MT-II                        | AK002567                     | 17750          | ENSMUSG00000031762 | 8.52                | 10.03                       |
| Adam8                 | up         | 2.85        | 2.09E-02 | chr7(-):147164832-147178437   | UCSC      | a disintegrin and meta   | CD156 // CD156a // E430039A1         | BC025584                     | 11501          | ENSMUSG00000025473 | 8.90                | 10.41                       |
| 5430425K12Rik         | up         | 2.84        | 3.38E-02 | chr13(+):81080319-81087858    | UCSC      | RIKEN cDNA 543042        | ---                                  | AK017339                     | ---            | ---                | 5.12                | 6.63                        |
| ---                   | up         | 2.83        | 1.40E-03 | chr7(+):75196005-75198972     | UCSC      | ---                      | ---                                  | AK053468                     | ---            | ---                | 7.03                | 8.53                        |
| ---                   | up         | 2.82        | 2.50E-02 | chr7(-):71051746-71052522     | UCSC      | ---                      | ---                                  | AK138320                     | ---            | ---                | 7.93                | 9.43                        |
| Dgkq                  | up         | 2.82        | 3.77E-02 | chr16(-):22468534-22657295    | UCSC      | diacylglycerol kinase    | Z900055E17Rik // Daqk3 // E430       | AK220294                     | 110197         | ENSMUSG00000022861 | 7.83                | 9.33                        |
| Empd3                 | up         | 2.81        | 1.94E-03 | chr9(+):120448948-120477435   | UCSC      | ectonucleoside triphos   | Cd3393 // HB6 // NTPDase-3           | AK046218                     | 215446         | ENSMUSG00000041608 | 6.69                | 8.18                        |
| 1810033B17Rik         | up         | 2.80        | 4.98E-02 | chr8(+):3865754-3869259       | UCSC      | RIKEN cDNA 181003        | ---                                  | AK087121                     | 69189          | ENSMUSG00000013974 | 8.52                | 10.00                       |
| ---                   | up         | 2.78        | 8.44E-03 | chr8(+):11457471-11459742     | UCSC      | ---                      | ---                                  | AK157419                     | ---            | ---                | 5.89                | 7.36                        |
| Ltf                   | up         | 2.77        | 3.99E-02 | chr9(-):1110921794-110945270  | UCSC      | lactoferrin              | lactoferrin // Lf                    | AK036491                     | 17002          | ENSMUSG00000032496 | 11.29               | 12.77                       |
| Tas2r143              | up         | 2.77        | 5.26E-03 | chr8(-):42325037-42351122     | UCSC      | taste receptor, type 2   | mt2r36 // Tas2r43                    | BC148239                     | 387514         | ENSMUSG00000046652 | 6.67                | 8.14                        |
| Csar1                 | up         | 2.76        | 2.74E-02 | chr7(-):16832094-16844687     | UCSC      | complement compone       | C5ar // C5r1 // Cd88 // D7Msu1       | AK158027                     | 12273          | ENSMUSG00000049130 | 8.84                | 10.31                       |
| Cpeb3                 | up         | 2.72        | 1.90E-02 | chr19(+):37096369-37281999    | UCSC      | cytoplasmic polyaden     | 4831444O18Rik // mKIAA0940           | AB093274                     | 208922         | ENSMUSG00000039652 | 6.54                | 7.98                        |
| Cd300lf               | up         | 2.72        | 2.10E-02 | chr11(-):114977533-114995306  | UCSC      | CD300 antigen like fa    | CLM-1 // DlgR2 // F730004D16R        | BC057864                     | 246746         | ENSMUSG00000047798 | 7.95                | 9.40                        |
| Cyp4f18               | up         | 2.71        | 4.48E-03 | chr8(-):74512381-74533527     | UCSC      | cytochrome P450, fam     | 1810054N16Rik                        | AK007863                     | 72054          | ENSMUSG00000030484 | 8.80                | 10.23                       |
| ---                   | up         | 2.70        | 9.98E-04 | chr8(-):35012639-35013410     | UCSC      | ---                      | ---                                  | AK040416                     | ---            | ---                | 6.82                | 8.25                        |
| Gcnt2                 | up         | 2.70        | 3.48E-02 | chr13(+):40955137-41056280    | UCSC      | glucosaminyl (N-acety    | 5330430K10Rik // IGnT // IGnTA       | BC094572                     | 14538          | ENSMUSG00000021360 | 8.64                | 10.07                       |
| 9230118H08Rik         | up         | 2.70        | 2.26E-02 | chr11(+):7855875-7856585      | UCSC      | RIKEN cDNA 923011        | ---                                  | AK020356                     | ---            | ---                | 4.98                | 6.39                        |
| Ier3                  | up         | 2.69        | 7.32E-03 | chr17(+):35858628-35959861    | UCSC      | immediate early respo    | cAMPInduciblegene3 // ci-3 // gly    | AK051003                     | 15937          | ENSMUSG00000030541 | 9.21                | 10.63                       |
| ---                   | up         | 2.68        | 2.55E-02 | chr6(+):22065607-22066520     | UCSC      | ---                      | ---                                  | AK051981                     | ---            | ---                | 5.69                | 7.11                        |
| Cdk18                 | up         | 2.66        | 1.98E-02 | chr1(-):134010127-13403628    | UCSC      | cyclin-dependent kina    | Pek3                                 | AK004988                     | 18557          | ENSMUSG00000026437 | 7.68                | 9.09                        |
| Fam70a                | up         | 2.65        | 2.11E-02 | chrX(-):35549750-35605617     | UCSC      | family with sequence     | 6430550H21Rik                        | AK041985                     | 245386         | ENSMUSG00000036502 | 6.19                | 7.60                        |
| Rab3b                 | up         | 2.65        | 3.26E-02 | chr4(+):108551675-108615929   | UCSC      | RAB3B, member RAS        | ---                                  | AK082959                     | 69908          | ENSMUSG00000030411 | 6.27                | 7.67                        |
| 2010005H15Rik         | up         | 2.64        | 3.28E-02 | chr16(+):36221648-36257513    | UCSC      | RIKEN cDNA 201000        | ---                                  | BC145264                     | 76770          | ENSMUSG00000051949 | 11.62               | 13.02                       |
| 5330421C15Rik         | up         | 2.61        | 3.01E-02 | chr10(+):5317538-5323044      | UCSC      | RIKEN cDNA 533042        | ---                                  | AK039175                     | ---            | ---                | 7.09                | 8.47                        |
| B230303A05Rik         | up         | 2.61        | 6.08E-03 | chr13(-):15905387-16008490    | UCSC      | RIKEN cDNA B23030        | EG328191                             | AK045681                     | ---            | ---                | 5.91                | 7.29                        |
| ---                   | up         | 2.61        | 4.08E-02 | chr12(-):86938540-86940124    | UCSC      | ---                      | ---                                  | AK033142                     | ---            | ---                | 6.49                | 7.88                        |
| Gp49a                 | up         | 2.60        | 5.96E-03 | chr10(+):51200464-51206509    | UCSC      | glycoprotein 49 A        | gp49                                 | AK167751                     | 14727          | ENSMUSG00000062593 | 10.63               | 12.01                       |
| Prok2                 | up         | 2.59        | 1.93E-02 | chr6(+):9961293-9967638       | UCSC      | prokinectin 2            | BombinavariegataBkDaprotein // 1     | AF182095                     | 50501          | ENSMUSG00000033069 | 6.89                | 7.97                        |
| Sfp                   | up         | 2.58        | 3.71E-02 | chr2(+):1164179807-1164182243 | UCSC      | secretory leukocyte pe   | ---                                  | BC028509                     | 20568          | ENSMUSG00000017002 | 11.87               | 13.23                       |
| Vamp5                 | up         | 2.57        | 9.58E-03 | chr6(+):72318043-72318627     | UCSC      | vesicle-associated me    | Camp                                 | BC145146                     | 53620          | ENSMUSG00000073002 | 5.90                | 7.26                        |
| Pilrb1                | up         | 2.57        | 4.66E-02 | chr5(-):138293375-13829226    | UCSC      | paired immunogloblin-    | Fdact // Pilrb                       | AJ400847                     | 170741         | ENSMUSG00000066684 | 7.67                | 9.03                        |
| Plekha7               | up         | 2.56        | 2.47E-02 | chr10(-):6379246-6606166      | UCSC      | pleckstrin homology d    | D10Erd733e // mKIAA1209              | AK034403                     | 213783         | ENSMUSG00000040624 | 6.70                | 8.05                        |
| 9430027J11Rik         | up         | 2.56        | 1.60E-03 | chr14(-):98207555-98209066    | UCSC      | RIKEN cDNA 943002        | ---                                  | AK054234                     | ---            | ---                | 5.86                | 7.21                        |
| Igax                  | up         | 2.55        | 1.82E-02 | chr7(+):135273060-135294170   | UCSC      | integrin alpha X         | Cd11c // CD11C(p150)alphanp          | AK155816                     | 16411          | ENSMUSG00000030789 | 7.87                | 9.23                        |
| B430306N03Rik         | up         | 2.55        | 2.44E-02 | chr17(+):48454627-48466349    | UCSC      | RIKEN cDNA B43030        | ---                                  | AK046672                     | 320148         | ENSMUSG00000043740 | 8.24                | 9.59                        |
| ---                   | up         | 2.54        | 1.36E-02 | chr6(+):66866397-66870707     | UCSC      | ---                      | ---                                  | AK053250                     | ---            | ---                | 7.18                | 8.53                        |
| Tnfrsf6               | up         | 2.54        | 4.79E-02 | chr2(+):51893623-51912201     | UCSC      | tumor necrosis factor    | Tnfrsf6 // TSG-6 // Tsg6             | U83903                       | 21930          | ENSMUSG00000053475 | 6.67                | 8.02                        |
| ---                   | up         | 2.54        | 6.52E-03 | chr1(+):75524275-75524647     | UCSC      | ---                      | ---                                  | AK137857                     | ---            | ---                | 4.64                | 5.98                        |
| Lilrb3                | up         | 2.52        | 4.43E-02 | chr7(-):3663011-3671993       | UCSC      | leukocyte immunoglob     | Gp1 // Pirb                          | AF182095                     | 18733          | ENSMUSG00000058818 | 7.64                | 10.64                       |
| Atap3                 | up         | 2.52        | 4.39E-02 | chr18(+):38132282-38158563    | UCSC      | ArtGAP with RhoGAP       | Centd3 // DRAG1 // E030006K04        | AF469822                     | 106852         | ENSMUSG00000024451 | 6.73                | 9.06                        |
| Sdc1                  | up         | 2.51        | 1.35E-02 | chr12(+):8778160-8799884      | UCSC      | syndecan 1               | CD138 // syn-1 // Synd // Synd1      | AK132236                     | 20969          | ENSMUSG00000020592 | 8.77                | 10.10                       |
| L1cam                 | up         | 2.50        | 7.40E-03 | chrX(-):71099328-71126136     | UCSC      | L1 cell adhesion mole    | CD171 // L1 // L1-NCAM // NCAM       | BC056988                     | 16728          | ENSMUSG00000033191 | 7.69                | 9.02                        |
| Aph1b                 | up         | 2.50        | 1.33E-02 | chr9(-):66623016-66643298     | UCSC      | anterior pharynx defec   | 2310057K14Rik                        | AK162585                     | 208117         | ENSMUSG00000032375 | 8.14                | 9.47                        |
| Pycard                | up         | 2.50        | 2.07E-02 | chr7(+):135136804-135140112   | UCSC      | PYD and CARD doma        | 9130417A21Rik // Asc // TMS-1        | AK050905                     | 66824          | ENSMUSG00000030793 | 6.91                | 8.23                        |
| ---                   | up         | 2.50        | 8.54E-03 | chr16(-):84974154-84975696    | UCSC      | ---                      | ---                                  | AK079655                     | ---            | ---                | 7.62                | 8.94                        |
| Gm10872               | up         | 2.50        | 3.88E-03 | chr15(-):76097239-76100270    | UCSC      | predicted gene 10872     | ---                                  | AK155479                     | ---            | ENSMUSG00000075583 | 7.58                | 8.90                        |
| ---                   | up         | 2.47        | 3.45E-02 | chr9(-):104204258-104207239   | UCSC      | ---                      | ---                                  | AK155854                     | ---            | ---                | 8.91                | 10.21                       |
| ---                   | up         | 2.46        | 2.00E-02 | chr9(+):74838119-74840160     | UCSC      | ---                      | ---                                  | AK149158                     | ---            | ---                | 6.58                | 7.88                        |
| Cpne2                 | up         | 2.46        | 4.30E-02 | chr6(+):97056928-97094431     | UCSC      | copine II                | 3322401K10Rik // MGC:30751 // 1      | BC031901                     | 234577         | ENSMUSG00000034361 | 9.27                | 10.57                       |
| Tnfrsf2               | up         | 2.46        | 2.33E-02 | chr12(+):112680869-11269328   | UCSC      | tumor necrosis factor    | Tnfrsf2 // Tnfr54 // Tnfrp2          | AK170719                     | 21928          | ENSMUSG00000021281 | 8.26                | 9.56                        |
| ---                   | up         | 2.46        | 1.95E-02 | chr12(+):103622378-103624318  | UCSC      | ---                      | ---                                  | AK134104                     | ---            | ---                | 7.18                | 8.48                        |
| ---                   | up         | 2.46        | 2.41E-02 | chr1(+):91644470-91646286     | UCSC      | ---                      | ---                                  | AK158736                     | ---            | ---                | 5.62                | 6.92                        |
| 5330402F18Rik // Ntn2 | up         | 2.45        | 9.24E-03 | chr2(-):29050314-29108513     | UCSC      | RIKEN cDNA 533040        | 2610016D08Rik // Lmnt2               | BC145600                     | 171171         | ENSMUSG00000035513 | 8.16                | 9.45                        |
| Gm10693               | up         | 2.44        | 3.16E-02 | chr7(-):3812283-3820755       | UCSC      | predicted pseudogene     | ---                                  | AK137448                     | 675749         | ENSMUSG00000074420 | 9.30                | 10.58                       |
| Nlrp3                 | up         | 2.43        | 1.16E-03 | chr1(+):59355087-59380458     | UCSC      | NLR family, pyrin dom    | C1as1 // cryopyrin // Mmiq1 // NALP3 | AY495377                     | 216799         | ENSMUSG00000032691 | 8.28                | 9.56                        |
| 9230118N17Rik         | up         | 2.42        | 1.62E-02 | chr7(+):142758539-142759809   | UCSC      | RIKEN cDNA 923011        | ---                                  | AK020358                     | ---            | ---                | 5.97                | 7.24                        |
| A730014G21Rik         | up         | 2.42        | 3.78E-02 | chr14(+):98540304-98541878    | UCSC      | RIKEN cDNA A73001        | ---                                  | AK042670                     | ---            | ---                | 7.40                | 8.68                        |
| Mrgpra2b              | up         | 2.41        | 4.64E-02 | chr7(-):54719177-54784232     | UCSC      | MAS-related GPR, me      | MrgA2 // Mrgpra2                     | AY042192                     | 235712         | ENSMUSG00000054040 | 10.89               | 12.16                       |
| Bclp1 // Bclp2        | up         | 2.41        | 9.74E-03 | chr3(-):105819669-105835815   | UCSC      | brain chitinase like pr  | ---                                  | AK081756                     | 228677         | ENSMUSG00000043873 | 6.47                | 7.74                        |
| Acta2                 | up         | 2.40        | 2.69E-02 | chr19(+):34315580-34329826    | UCSC      | actin, alpha 2           | smoothb10041G09Rik // a-SMA // Actv  | AK156331                     | ---            | ---                | 7.29                | 8.55                        |
| E130106K03Rik         | up         | 2.40        | 2.92E-03 | chr11(+):31800792-31806290    | UCSC      | RIKEN cDNA E13010        | ---                                  | AK056336                     | ---            | ---                | 6.25                | 7.51                        |
| Pilra                 | up         | 2.39        | 2.31E-02 | chr5(-):138263180-138277481   | UCSC      | paired immunogloblin-    | FD03                                 | AK041670                     | 231805         | ENSMUSG00000046245 | 10.31               | 11.56                       |
| Olfir1394             | up         | 2.39        | 2.20E-03 | chr11(+):48973515-48974456    | UCSC      | olfactory receptor 139   | Ga_xk02T2QP8b-6274566-62             | BC127968                     | 258273         | ENSMUSG00000048378 |                     |                             |

Supplementary Table S1. List of the 997 Regulated Genes of AML mice treated with ABT-737(Fold-change ≥ 1.5; P-Value ≤ 0.05); 764 upregulated and 233 downregulated genes.

GEO Accession No.: GSE48601

| Gene Symbol   | Regulation | Fold-Change | P-Value  | Gene Coordinates (hg19)      | UCSC Link            | Gene Name                  | Aliases and Synonyms                | Representative Transcript ID | Entrez Gene ID | Ensembl ID          | Intensity NRAS-BCL2 | Intensity NRAS-BCL2 ABT-737 |
|---------------|------------|-------------|----------|------------------------------|----------------------|----------------------------|-------------------------------------|------------------------------|----------------|---------------------|---------------------|-----------------------------|
| Nfam1         | up         | 2.33        | 3.64E-02 | chr15(-):82627166-82863797   | <a href="#">UCSC</a> | Nfat activating molecule   | 4921501M20Rik // Nfam1              | AK152688                     | 74039          | ENSMUSG00000058099  | 9.00                | 10.22                       |
| Ccdc63        | up         | 2.32        | 1.56E-02 | chr5(-):122558065-122590832  | <a href="#">UCSC</a> | coiled-coil domain con     | 4921511C16Rik                       | AK029513                     | 330188         | ENSMUSG00000043036  | 6.44                | 7.65                        |
| Ampd3         | up         | 2.31        | 4.69E-02 | chr7(+):117911720-117955917  | <a href="#">UCSC</a> | adenosine monophos         | ---                                 | D85596                       | 117177         | ENSMUSG00000005686  | 8.98                | 10.19                       |
| Fgr           | up         | 2.31        | 3.75E-02 | chr4(+):132530033-132559629  | <a href="#">UCSC</a> | Gardner-Rasheed feil       | ---                                 | AK157640                     | 14191          | ENSMUSG00000028974  | 9.48                | 10.68                       |
| Bnfr1a        | up         | 2.31        | 4.63E-02 | chr14(+):35224255-35315745   | <a href="#">UCSC</a> | bone morphogenetic         | 11110037122Rik // ALK3 // Bmpr1     | AK132651                     | 12166          | ENSMUSG00000021798  | 6.78                | 7.93                        |
| Pycr1         | up         | 2.31        | 3.72E-02 | chr11(-):120497026-120505014 | <a href="#">UCSC</a> | pyroline-5-carboxylat      | MGC:11688                           | AK139185                     | 203027         | ENSMUSG00000025140  | 7.95                | 9.16                        |
| Pmp22         | up         | 2.31        | 4.77E-02 | chr11(+):62945011-62973048   | <a href="#">UCSC</a> | peripheral myelin prot     | Gas-3                               | M32240                       | 18858          | ENSMUSG00000018217  | 6.62                | 7.83                        |
| Plp2          | up         | 2.30        | 1.06E-02 | chrX(-):7245069-7244849      | <a href="#">UCSC</a> | proteolipid protein 2      | miMA4                               | AK012816                     | 18824          | ENSMUSG000000031146 | 8.31                | 9.51                        |
| ---           | up         | 2.30        | 2.56E-02 | chr6(-):69176847-69177123    | <a href="#">UCSC</a> | ---                        | ---                                 | AF139247                     | ---            | ---                 | 11.14               | 12.34                       |
| ---           | up         | 2.30        | 1.23E-02 | chr9(-):5834138-5835942      | <a href="#">UCSC</a> | ---                        | ---                                 | AK134019                     | ---            | ---                 | 7.75                | 8.94                        |
| Ccpg1         | up         | 2.29        | 7.78E-03 | chr9(+):72833383-72864145    | <a href="#">UCSC</a> | cell cycle progression     | 1700030B06Rik // 181007J313R        | AK134675                     | 72278          | ENSMUSG00000034563  | 9.79                | 10.39                       |
| Pon3          | up         | 2.29        | 1.57E-02 | chr6(-):5170852-5206253      | <a href="#">UCSC</a> | paraoxonase 3              | ---                                 | AK076090                     | 268823         | ENSMUSG00000029759  | 8.39                | 9.59                        |
| Syne1         | up         | 2.29        | 2.92E-02 | chr10(+):5151834-5325620     | <a href="#">UCSC</a> | synaptic nuclear envel     | 8B // A330049M09Rik // C13003       | AK281870                     | 64009          | ENSMUSG00000019769  | 9.91                | 11.11                       |
| Cor2          | up         | 2.28        | 6.22E-04 | chr9(-):110956990-110960024  | <a href="#">UCSC</a> | chemokine (C-C motif       | 1810047105Rik // CCR11 // Cmk       | AK145846                     | 54199          | ENSMUSG00000043953  | 10.02               | 11.21                       |
| 6030400A10Rik | up         | 2.28        | 1.50E-02 | chr5(+):43646396-43657607    | <a href="#">UCSC</a> | RIKEN cDNA 603040          | ---                                 | AK020045                     | ---            | ---                 | 6.40                | 7.59                        |
| Oosp1         | up         | 2.28        | 3.54E-02 | chr19(-):11741950-11765546   | <a href="#">UCSC</a> | oocyte secreted prote      | ---                                 | AK033038                     | 170834         | ENSMUSG00000041857  | 8.12                | 9.31                        |
| ---           | up         | 2.28        | 2.17E-02 | chr19(+):8094047-8095101     | <a href="#">UCSC</a> | ---                        | ---                                 | AK161725                     | ---            | ---                 | 8.29                | 9.48                        |
| Clic5         | up         | 2.28        | 1.35E-02 | chr17(+):44325532-44416455   | <a href="#">UCSC</a> | chloride intracellular c   | 5730531E12Rik                       | AK156849                     | 224796         | ENSMUSG00000023959  | 6.40                | 7.59                        |
| ---           | up         | 2.28        | 4.00E-02 | chr16(-):85136862-85142316   | <a href="#">UCSC</a> | ---                        | ---                                 | AK050788                     | ---            | ---                 | 6.10                | 7.29                        |
| ---           | up         | 2.27        | 4.67E-02 | chr1(+):185870793-185872680  | <a href="#">UCSC</a> | ---                        | ---                                 | AK080157                     | ---            | ---                 | 8.67                | 9.86                        |
| ---           | up         | 2.27        | 4.32E-02 | chr11(-):74245972-74247475   | <a href="#">UCSC</a> | ---                        | ---                                 | AK082577                     | ---            | ---                 | 7.22                | 8.40                        |
| A630001O12Rik | up         | 2.26        | 1.07E-02 | chr8(+):129363131-129375733  | <a href="#">UCSC</a> | RIKEN cDNA A63000          | ---                                 | AK172442                     | ---            | ENSMUSG00000074025  | 7.06                | 8.24                        |
| Klra17        | up         | 2.26        | 1.58E-02 | chr6(-):129781168-129826691  | <a href="#">UCSC</a> | killer cell lectin-like re | Ly-49Q // Ly49Q // Ly49q1           | AB033769                     | 170733         | ENSMUSG00000014543  | 6.23                | 7.41                        |
| ---           | up         | 2.26        | 4.86E-02 | chr5(-):20530334-20531843    | <a href="#">UCSC</a> | ---                        | ---                                 | ---                          | ---            | ---                 | 6.40                | 7.57                        |
| Cd59a         | up         | 2.26        | 2.28E-03 | chr2(+):103935989-103955606  | <a href="#">UCSC</a> | Cd59a antigen              | Cd59 // protectin                   | AK002743                     | 12509          | ENSMUSG000000032679 | 7.91                | 9.09                        |
| ---           | up         | 2.25        | 1.11E-02 | chr14(+):62534144-6535723    | <a href="#">UCSC</a> | ---                        | ---                                 | AK043889                     | ---            | ---                 | 6.38                | 7.53                        |
| ---           | up         | 2.24        | 2.88E-03 | chr9(+):86737325-86734763    | <a href="#">UCSC</a> | ---                        | ---                                 | AK089540                     | ---            | ---                 | 9.42                | 10.58                       |
| Clec4e        | up         | 2.24        | 1.23E-02 | chr6(-):123231806-123239889  | <a href="#">UCSC</a> | C-type lectin domain f     | Clec3f9 // Mincle                   | AK150899                     | 56619          | ENSMUSG000000030142 | 9.78                | 10.95                       |
| ---           | up         | 2.24        | 2.49E-02 | chr18(+):4994932-5003074     | <a href="#">UCSC</a> | ---                        | ---                                 | AK085972                     | ---            | ---                 | 8.22                | 9.39                        |
| ---           | up         | 2.24        | 4.03E-02 | chr12(+):17764748-17767247   | <a href="#">UCSC</a> | ---                        | ---                                 | AK136551                     | ---            | ---                 | 6.42                | 7.58                        |
| Rab11fip5     | up         | 2.22        | 1.69E-02 | chr6(-):85284957-85324628    | <a href="#">UCSC</a> | RAB11 family interact      | 9130206P09Rik // D6Ert32e // C      | AK129230                     | 52055          | ENSMUSG000000051343 | 6.87                | 8.02                        |
| Sepr1         | up         | 2.22        | 2.37E-02 | chr4(-):134093811-134101229  | <a href="#">UCSC</a> | selenoprotein N, 1         | 1110019H12Rik                       | BC127935                     | 74777          | ENSMUSG000000050989 | 7.56                | 8.72                        |
| ---           | up         | 2.22        | 1.73E-02 | chr19(+):53425731-53429499   | <a href="#">UCSC</a> | ---                        | ---                                 | AK132339                     | ---            | ---                 | 6.80                | 7.95                        |
| ---           | up         | 2.22        | 3.70E-02 | chr18(+):4924116-4926394     | <a href="#">UCSC</a> | ---                        | ---                                 | AK035407                     | ---            | ---                 | 8.03                | 9.18                        |
| ---           | up         | 2.21        | 3.82E-02 | chr6(-):99428489-99431033    | <a href="#">UCSC</a> | ---                        | ---                                 | AK032946                     | ---            | ---                 | 8.70                | 6.84                        |
| ---           | up         | 2.21        | 2.76E-02 | chr5(+):43639424-43640996    | <a href="#">UCSC</a> | ---                        | ---                                 | AK142870                     | ---            | ---                 | 7.05                | 8.20                        |
| Slc40a1       | up         | 2.21        | 6.28E-03 | chr1(-):45964915-45983364    | <a href="#">UCSC</a> | solute carrier family 4    | Dusg // ferroportin 1 // FPN1 // IR | AK144790                     | 53945          | ENSMUSG000000025993 | 9.86                | 10.20                       |
| ---           | up         | 2.20        | 1.38E-02 | chr7(-):70285871-70288121    | <a href="#">UCSC</a> | ---                        | ---                                 | X65538                       | ---            | ---                 | 11.07               | 12.20                       |
| Rel1          | up         | 2.20        | 2.42E-02 | chr5(-):64300137-64360136    | <a href="#">UCSC</a> | REL1-like 1                | ---                                 | AK140108                     | 100532         | ENSMUSG000000047881 | 7.86                | 9.00                        |
| Piwil2        | up         | 2.20        | 3.06E-02 | chr14(-):70772285-70828901   | <a href="#">UCSC</a> | piwi-like homolog 2 (D     | mili // Mwiilike                    | AB032605                     | 57746          | ENSMUSG000000036644 | 6.25                | 7.39                        |
| Agap1         | up         | 2.20        | 2.86E-02 | chr1(+):9135180-913791852    | <a href="#">UCSC</a> | ArfGAP with GTPase         | Centg2 // Ggap1 // mKIAA1099        | AK147603                     | 347722         | ENSMUSG000000055013 | 7.90                | 9.04                        |
| ---           | up         | 2.20        | 9.74E-03 | chr10(-):95226256-95229117   | <a href="#">UCSC</a> | ---                        | ---                                 | AK158373                     | ---            | ---                 | 5.73                | 6.86                        |
| ---           | up         | 2.19        | 2.00E-02 | chr6(-):99315482-99316577    | <a href="#">UCSC</a> | ---                        | ---                                 | AK038328                     | ---            | ---                 | 7.45                | 8.59                        |
| ---           | up         | 2.19        | 3.60E-03 | chr19(+):9116598-9117986     | <a href="#">UCSC</a> | ---                        | ---                                 | AK041788                     | ---            | ---                 | 7.17                | 8.30                        |
| Plkfb4        | up         | 2.18        | 2.60E-02 | chr9(+):108893947-108934711  | <a href="#">UCSC</a> | 6-phosphofructo-2-kin      | ---                                 | BC057594                     | 270198         | ENSMUSG000000025648 | 8.10                | 9.22                        |
| Gm4132        | up         | 2.18        | 7.66E-03 | chr12(-):117518871-117519462 | <a href="#">UCSC</a> | predicted gene 4132        | ---                                 | AK158567                     | 100042963      | ---                 | 6.83                | 7.96                        |
| ---           | up         | 2.18        | 4.91E-02 | chr1(+):82935997-82934121    | <a href="#">UCSC</a> | ---                        | ---                                 | AK080205                     | ---            | ---                 | 6.96                | 8.08                        |
| ---           | up         | 2.17        | 3.50E-02 | chr9(+):86755955-86757931    | <a href="#">UCSC</a> | ---                        | ---                                 | AK149039                     | ---            | ---                 | 7.98                | 9.10                        |
| Tnfrsf17      | up         | 2.17        | 3.66E-02 | chr16(+):11313902-11320185   | <a href="#">UCSC</a> | tumor necrosis factor      | BCM // Tnfrsf13 // Tnfrsf13a        | AK020247                     | 21935          | ENSMUSG000000022496 | 7.58                | 8.70                        |
| 5330427O13Rik | up         | 2.17        | 8.20E-04 | chr14(+):64766694-64769704   | <a href="#">UCSC</a> | RIKEN cDNA 533042          | ---                                 | AK036170                     | ---            | ---                 | 6.41                | 7.52                        |
| Emilin2       | up         | 2.16        | 3.34E-03 | chr17(-):71601513-71660897   | <a href="#">UCSC</a> | elastin microfibril inter  | basilin // FOAP-10                  | AK171303                     | 246707         | ENSMUSG000000024053 | 8.89                | 10.00                       |
| ---           | up         | 2.16        | 1.11E-02 | chr17(-):18045212-18047231   | <a href="#">UCSC</a> | ---                        | ---                                 | AK085637                     | ---            | ---                 | 7.80                | 8.92                        |
| Plau          | up         | 2.15        | 4.92E-02 | chr14(+):21655884-21662610   | <a href="#">UCSC</a> | plasminogen activator      | u-PA // uPA // urokinase-typeplas   | X02389                       | 18792          | ENSMUSG000000021822 | 7.29                | 8.40                        |
| Gabra4        | up         | 2.14        | 1.98E-02 | chr5(-):71960699-72049548    | <a href="#">UCSC</a> | gamma-aminobutyric         | Gabra-4                             | AK141571                     | 14397          | ENSMUSG000000029211 | 7.06                | 7.16                        |
| Fads3         | up         | 2.14        | 1.50E-02 | chr19(+):10116059-10134600   | <a href="#">UCSC</a> | fatty acid desaturase      | ---                                 | AK090042                     | 60527          | ENSMUSG000000024664 | 6.47                | 8.57                        |
| Hmox1         | up         | 2.13        | 9.68E-03 | chr8(+):77617516-77624488    | <a href="#">UCSC</a> | heme oxygenase (dec        | D8Wsu38e // hemoxygenase1           | AK159959                     | 15368          | ENSMUSG000000005413 | 9.72                | 10.81                       |
| B3gnt8        | up         | 2.13        | 4.78E-02 | chr7(+):26412657-26414509    | <a href="#">UCSC</a> | UDP-GlcNAc:betaGal         | B3gal7 // MGC:32391                 | BC025206                     | 232984         | ENSMUSG000000059478 | 6.70                | 7.79                        |
| ---           | up         | 2.13        | 2.48E-02 | chr3(-):75756046-75758223    | <a href="#">UCSC</a> | ---                        | ---                                 | AK148993                     | ---            | ---                 | 6.40                | 7.49                        |
| Tcf7l2        | up         | 2.13        | 3.38E-02 | chr14(+):55816310-56007721   | <a href="#">UCSC</a> | transcription factor 7     | 4mTcf-4B // mTcf-4E // Tcf-4 // Tcf | BC011397                     | 21416          | ENSMUSG000000024985 | 7.80                | 8.89                        |
| Mfsd6         | up         | 2.13        | 8.72E-03 | chr1(+):52714296-52784306    | <a href="#">UCSC</a> | solute carrier family 22   | Dctn1                               | AK035895                     | 98882          | ENSMUSG000000055802 | 9.71                | 10.81                       |
| ---           | up         | 2.12        | 4.38E-02 | chr8(+):3672429-3672954      | <a href="#">UCSC</a> | major facilitator super    | 221001L05Rik // 963002522Ri         | AK043010                     | ---            | ---                 | 6.59                | 7.68                        |
| ---           | up         | 2.12        | 3.70E-02 | chr6(-):67892071-67892336    | <a href="#">UCSC</a> | ---                        | ---                                 | ---                          | ---            | ---                 | 9.81                | 10.89                       |
| Fry           | up         | 2.12        | 1.18E-03 | chr5(+):150921242-151193433  | <a href="#">UCSC</a> | furry homolog (Drosop      | 9330186A19Rik // cg003              | AK157981                     | 320365         | ENSMUSG000000056602 | 7.26                | 8.34                        |
| ---           | up         | 2.12        | 3.93E-02 | chr2(-):146147191-146148631  | <a href="#">UCSC</a> | ---                        | ---                                 | AK148925                     | ---            | ---                 | 6.40                | 7.49                        |
| ---           | up         | 2.12        | 3.05E-02 | chr17(+):14034118-14035426   | <a href="#">UCSC</a> | ---                        | ---                                 | AK047822                     | ---            | ---                 | 5.94                | 7.03                        |
| Grina         | up         | 2.12        | 1.06E-03 | chr15(+):76077217-76080339   | <a href="#">UCSC</a> | glutamate receptor, io     | 1110025J15Rik                       | BC019157                     | 66168          | ENSMUSG000000022564 | 11.77               | 12.86                       |
| ---           | up         | 2.12        | 2.00E-02 | chr14(+):22119413-22121952   | <a href="#">UCSC</a> | ---                        | ---                                 | AK037322                     | ---            | ---                 | 7.84                | 8.92                        |
| Gsr           | up         | 2.11        | 3.05E-02 | chr8(+):34763710-34808633    | <a href="#">UCSC</a> | glutathione reductase      | D8Ert238e // Gr-1 // Gr1            | BC057325                     | 14782          | ENSMUSG000000031584 | 10.20               | 11.28                       |
| Cpr7l         | up         | 2.11        | 4.29E-02 | chr7(-):18919935-18929504    | <a href="#">UCSC</a> | G protein-coupled rec      | C5L2 // E030029A11Rik               | AK053187                     | 318430         | ENSMUSG000000074361 | 8.46                | 9.54                        |
| Slc22a4       | up         | 2.11        | 2.24E-02 | chr11(+):53796629-53841606   | <a href="#">UCSC</a> | solute carrier family 22   | Ctn1                                | AK143595                     | 30805          | ENSMUSG000000020334 | 7.06                | 8.14                        |
| Pde7b         | up         | 2.10        | 4.22E-02 | chr10(-):20117810-20444895   | <a href="#">UCSC</a> | phosphodiesterase 7B       | ---                                 | AK035385                     | 29863          | ENSMUSG000000019990 | 6.69                | 7.76                        |
| 4732465J04Rik | up         | 2.10        | 1.29E-02 | chr10(+):95200711-95259870   | <a href="#">UCSC</a> | RIKEN cDNA 473246          | ---                                 | AK169506                     | ---            | ---                 | 5.99                | 7.06                        |
| Tmem176a      | up         | 2.10        | 2.19E-02 | chr6(+):48791504-48797047    | <a href="#">UCSC</a> | transmembrane protei       | 0610011104Rik                       | AK079378                     | 66058          | ENSMUSG0            |                     |                             |

Supplementary Table S1. List of the 997 Regulated Genes of AML mice treated with ABT-737(Fold-change  $\geq 1.5$ ; P-Value  $\leq 0.05$ ); 764 upregulated and 233 downregulated genes.

GEO Accession No.: GSE48601

| Gene Symbol   | Regulation | Fold-Change | P-Value  | Gene Coordinates (hg19)      | UCSC Link            | Gene Name                  | Aliases and Synonyms             | Representative Transcript ID | Entrez Gene ID | Ensembl ID          | Intensity NRAS-BCL2 | Intensity NRAS-BCL2 ABT-737 |
|---------------|------------|-------------|----------|------------------------------|----------------------|----------------------------|----------------------------------|------------------------------|----------------|---------------------|---------------------|-----------------------------|
| Dnase1f1      | up         | 2.06        | 3.74E-02 | chr(X):71518556-71527672     | <a href="#">UCSC</a> | deoxyribonuclease 1        | D2310005K03Rik // Dnase1f1 // Dn | BC023246                     | 69537          | ENSMUSG00000019088  | 7.47                | 8.51                        |
| Klf7          | up         | 2.06        | 2.58E-03 | chr(1):64080059-64168000     | <a href="#">UCSC</a> | Kruppel-like factor 7      | l9830124P08Rik                   | AF338369                     | 93691          | ENSMUSG00000025958  | 9.01                | 10.05                       |
| F420015M19Rik | up         | 2.06        | 1.86E-02 | chr17(+):80963368-80965648   | <a href="#">UCSC</a> | RIKEN cDNA F42001          | ---                              | AK143604                     | 619329         | ---                 | 9.11                | 10.15                       |
| Lasp1         | up         | 2.06        | 1.19E-02 | chr11(+):97605982-97700078   | <a href="#">UCSC</a> | LIM and SH3 protein        | Def-4 // SH3P6 // Tg(11Colt1a)N  | AK154656                     | 16796          | ENSMUSG00000038366  | 10.15               | 11.19                       |
| Ldlr          | up         | 2.05        | 2.28E-02 | chr(4):21528042-21554360     | <a href="#">UCSC</a> | low density lipoprotein    | ---                              | AK151968                     | 16935          | ENSMUSG00000033193  | 7.65                | 8.69                        |
| Rbpms         | up         | 2.05        | 2.26E-02 | chr(8):34893119-35040292     | <a href="#">UCSC</a> | RNA binding protein        | g2010300K22Rik // 2700019M19R    | AK079238                     | 19663          | ENSMUSG000000031586 | 8.12                | 9.15                        |
| 2210406H18Rik | up         | 2.05        | 5.23E-04 | chr7(-):128206366-128207477  | <a href="#">UCSC</a> | RIKEN cDNA 2210406         | ---                              | AK008836                     | ---            | ---                 | 8.37                | 9.40                        |
| ---           | up         | 2.05        | 3.88E-02 | chr6(-):51820227-51822669    | <a href="#">UCSC</a> | ---                        | ---                              | AK043856                     | ---            | ---                 | 8.04                | 9.07                        |
| Piafr         | up         | 2.05        | 1.88E-02 | chr4(+):132120138-132136774  | <a href="#">UCSC</a> | platelet-activating factor | PAFR // PAFreceptor              | AK032547                     | 19204          | ENSMUSG00000056529  | 9.71                | 10.74                       |
| 1700029J11Rik | up         | 2.05        | 2.64E-02 | chr2(+):172298046-172299817  | <a href="#">UCSC</a> | RIKEN cDNA 1700029         | ---                              | BC137932                     | 76426          | ENSMUSG00000027505  | 6.99                | 8.02                        |
| ---           | up         | 2.05        | 1.79E-02 | chr1(-):88865571-88866327    | <a href="#">UCSC</a> | ---                        | ---                              | AK089357                     | ---            | ---                 | 6.46                | 7.50                        |
| ---           | up         | 2.05        | 6.55E-04 | chr11(+):97691483-97694620   | <a href="#">UCSC</a> | ---                        | ---                              | AK082834                     | ---            | ---                 | 6.65                | 7.68                        |
| 4833419F23Rik | up         | 2.04        | 1.33E-02 | chr18(+):4353544-4368918     | <a href="#">UCSC</a> | RIKEN cDNA 483341          | ---                              | AK014726                     | ---            | ENSMUSG00000086803  | 6.09                | 8.12                        |
| Gm889         | up         | 2.04        | 1.23E-02 | chr12(-):40902080-40926079   | <a href="#">UCSC</a> | predicted gene 889         | LOC380755                        | AK134025                     | 380755         | ENSMUSG00000071342  | 6.66                | 7.69                        |
| ---           | up         | 2.04        | 3.38E-02 | chr10(-):82050153-82053008   | <a href="#">UCSC</a> | ---                        | ---                              | AK140463                     | ---            | ---                 | 6.90                | 7.93                        |
| Tirap         | up         | 2.03        | 2.88E-02 | chr(3):34994370-35007878     | <a href="#">UCSC</a> | tol-1-interleukin 1 recep  | C130027E04Rik // Mal // MyD88    | AK151177                     | 117149         | ENSMUSG00000032041  | 7.59                | 8.61                        |
| 4833407H14Rik | up         | 2.03        | 4.35E-02 | chr19(+):53535111-53537213   | <a href="#">UCSC</a> | RIKEN cDNA 483340          | ---                              | AK014661                     | ---            | ---                 | 7.59                | 8.61                        |
| Il10rb        | up         | 2.03        | 1.88E-02 | chr16(+):91408734-91410246   | <a href="#">UCSC</a> | interleukin 10 receptor    | 6620401D04Rik // CRF2-4 // Crtf  | AK137922                     | 16155          | ENSMUSG00000022969  | 7.08                | 8.10                        |
| Sel1l         | up         | 2.03        | 1.68E-02 | chr12(-):93045060-93087597   | <a href="#">UCSC</a> | sel-1 suppressor of lin    | Sel1h                            | AK220502                     | 20338          | ENSMUSG00000020964  | 9.69                | 10.71                       |
| ---           | up         | 2.02        | 6.26E-03 | chr1(+):60836196-60838305    | <a href="#">UCSC</a> | ---                        | ---                              | AK037422                     | ---            | ---                 | 7.94                | 8.95                        |
| ---           | up         | 2.02        | 4.44E-02 | chr(3):78958512-78963341     | <a href="#">UCSC</a> | ---                        | ---                              | AK046811                     | ---            | ---                 | 7.29                | 8.31                        |
| Soat2         | up         | 2.02        | 1.59E-02 | chr15(+):101981006-101993889 | <a href="#">UCSC</a> | sterol O-acyltransferase   | ACAT2 // D15Wsu97e               | BC025931                     | 223920         | ENSMUSG00000023045  | 7.46                | 8.47                        |
| Atp6v0a1      | up         | 2.02        | 4.64E-02 | chr11(+):100870794-100925029 | <a href="#">UCSC</a> | ATPase, H+ transport       | Atp6n1 // Atp6n1a // V-ATPasea   | AF218249                     | 11975          | ENSMUSG00000019302  | 9.10                | 10.11                       |
| Rab11fp1      | up         | 2.01        | 1.60E-02 | chr8(-):28279312-28281484    | <a href="#">UCSC</a> | RAB11 family interact      | 2010200K21Rik // 4833414G05R     | AK042782                     | 75767          | ENSMUSG000000031488 | 8.38                | 9.39                        |
| ---           | up         | 2.01        | 4.55E-02 | chr8(+):119817841-119820313  | <a href="#">UCSC</a> | ---                        | ---                              | AK037137                     | ---            | ---                 | 8.00                | 9.01                        |
| Amyg          | up         | 2.01        | 1.85E-02 | chr11(+):109334866-109434841 | <a href="#">UCSC</a> | arylsulfatase G            | 6330406P08Rik                    | AK158728                     | 74008          | ENSMUSG00000020604  | 6.70                | 7.70                        |
| Slx11         | up         | 2.00        | 3.76E-03 | chr10(-):12659787-12684040   | <a href="#">UCSC</a> | syn-taxin 11               | 9830405C08Rik                    | AK017897                     | 74732          | ENSMUSG00000039232  | 8.11                | 9.11                        |
| 4933416M07Rik | up         | 2.00        | 7.82E-03 | chr8(+):28253382-28260179    | <a href="#">UCSC</a> | RIKEN cDNA 493341          | ---                              | AK016835                     | ---            | ---                 | 6.50                | 7.50                        |
| ---           | up         | 2.00        | 5.86E-03 | chr7(+):75366605-75368165    | <a href="#">UCSC</a> | ---                        | ---                              | AK037379                     | ---            | ---                 | 6.61                | 7.61                        |
| 2010310C07Rik | up         | 2.00        | 2.87E-02 | chr4(-):42320667-42331214    | <a href="#">UCSC</a> | RIKEN cDNA 201031          | ---                              | AK008560                     | ---            | ---                 | 6.06                | 7.06                        |
| Gcnt1         | up         | 2.00        | 1.36E-02 | chr19(-):17400633-17447336   | <a href="#">UCSC</a> | glucosaminyl (N-acetyl     | 5630400D21Rik // 6-N-acetylgluc  | D87332                       | 14537          | ENSMUSG00000038843  | 8.23                | 9.23                        |
| ---           | up         | 2.00        | 1.82E-02 | chr1(+):185668292-185870661  | <a href="#">UCSC</a> | ---                        | ---                              | AK040639                     | ---            | ---                 | 9.27                | 10.26                       |
| 9330160F10Rik | up         | 2.00        | 9.28E-03 | chr11(+):68871220-68873986   | <a href="#">UCSC</a> | RIKEN cDNA 933016          | ---                              | AK137386                     | ---            | ENSMUSG00000072808  | 9.36                | 8.36                        |
| ---           | up         | 1.99        | 8.08E-03 | chr6(-):70290867-70291174    | <a href="#">UCSC</a> | ---                        | ---                              | L09018                       | ---            | ---                 | 10.83               | 11.83                       |
| Gm6209        | up         | 1.99        | 4.39E-02 | chr3(-):50320321-50411145    | <a href="#">UCSC</a> | predicted gene 6209        | ---                              | AK138462                     | 621304         | ---                 | 6.18                | 7.18                        |
| Myo1f         | up         | 1.99        | 4.16E-02 | chr17(+):33692664-33744709   | <a href="#">UCSC</a> | myosin IF                  | C330006B10Rik                    | BC046502                     | 17916          | ENSMUSG00000024300  | 8.72                | 9.71                        |
| Dab1          | up         | 1.99        | 2.55E-02 | chr14(-):78963810-79051951   | <a href="#">UCSC</a> | diacylglycerol kinase      | 5830402B05Rik                    | AK133314                     | 380921         | ENSMUSG00000034731  | 7.34                | 8.33                        |
| Zfx3          | up         | 1.98        | 4.08E-02 | chr8(+):11238544-111481839   | <a href="#">UCSC</a> | zinc finger homeobox       | AZ30102L03Rik // Afb1 // WBP9    | D26046                       | 11906          | ENSMUSG00000038872  | 7.81                | 8.80                        |
| Ptpre         | up         | 1.98        | 3.01E-02 | chr7(+):142729164-142877976  | <a href="#">UCSC</a> | protein tyrosine phosph    | PTPe // PTPepsilon // RPTPepsa   | U35368                       | 19267          | ENSMUSG000000041836 | 8.95                | 9.94                        |
| ---           | up         | 1.98        | 4.23E-02 | chr16(-):85155444-85158481   | <a href="#">UCSC</a> | ---                        | ---                              | AK030475                     | ---            | ---                 | 7.01                | 8.00                        |
| ---           | up         | 1.98        | 4.74E-02 | chr14(-):98494855-98500410   | <a href="#">UCSC</a> | ---                        | ---                              | AK140944                     | ---            | ---                 | 5.92                | 6.90                        |
| A530023O14Rik | up         | 1.97        | 6.12E-03 | chr7(-):111503894-111518399  | <a href="#">UCSC</a> | RIKEN cDNA A53002          | ---                              | AK080092                     | 244183         | ENSMUSG00000052749  | 6.14                | 7.12                        |
| 2310044K18Rik | up         | 1.97        | 2.82E-03 | chr7(+):90808064-90809473    | <a href="#">UCSC</a> | RIKEN cDNA 231004          | ---                              | AK009804                     | ---            | ENSMUSG00000085080  | 7.27                | 8.25                        |
| 2310016D23Rik | up         | 1.97        | 2.17E-02 | chr1(+):60835688-60860632    | <a href="#">UCSC</a> | RIKEN cDNA 231001          | ---                              | AK009383                     | ---            | ENSMUSG00000085965  | 8.58                | 9.55                        |
| Lilrb4        | up         | 1.97        | 2.48E-03 | chr10(+):51210768-51216149   | <a href="#">UCSC</a> | leukocyte immunoglob       | CD85K // Gp49b // HM18 // ILT3   | AK155750                     | 14728          | ENSMUSG00000062593  | 11.53               | 12.51                       |
| ---           | up         | 1.97        | 4.06E-02 | chr3(-):50428269-50432334    | <a href="#">UCSC</a> | ---                        | ---                              | AK036888                     | ---            | ---                 | 6.34                | 7.32                        |
| Rnd1          | up         | 1.97        | 1.87E-02 | chr15(-):98493852-98507894   | <a href="#">UCSC</a> | Rho family GTPase 1        | A830014L09Rik // Arhs            | AK039992                     | 223881         | ENSMUSG00000054855  | 7.41                | 8.39                        |
| ---           | up         | 1.97        | 1.30E-02 | chr11(+):76600433-76602537   | <a href="#">UCSC</a> | ---                        | ---                              | AK036548                     | ---            | ---                 | 6.94                | 7.92                        |
| Ndufa1        | up         | 1.96        | 1.13E-02 | chr(X):34727586-34731140     | <a href="#">UCSC</a> | NADH dehydrogenase         | 1810049F12Rik // MWFE            | AK007840                     | 54405          | ENSMUSG00000016427  | 7.41                | 8.39                        |
| ---           | up         | 1.96        | 2.98E-02 | chr14(-):68541069-68546662   | <a href="#">UCSC</a> | ---                        | ---                              | AK137797                     | ---            | ---                 | 6.18                | 7.15                        |
| 4833406M21Rik | up         | 1.96        | 4.74E-02 | chr13(+):110440121-110441927 | <a href="#">UCSC</a> | RIKEN cDNA 483340          | ---                              | AK014658                     | ---            | ---                 | 6.64                | 7.61                        |
| Hrh2          | up         | 1.96        | 9.16E-03 | chr13(+):54287497-54317801   | <a href="#">UCSC</a> | histamine receptor H2      | ---                              | AK020259                     | 15466          | ENSMUSG00000034987  | 7.32                | 8.29                        |
| ---           | up         | 1.95        | 2.46E-02 | chr6(+):149259938-149262913  | <a href="#">UCSC</a> | ---                        | ---                              | AK165110                     | ---            | ---                 | 9.25                | 10.22                       |
| ---           | up         | 1.95        | 3.61E-02 | chr10(+):3412137-3413643     | <a href="#">UCSC</a> | ---                        | ---                              | AK038189                     | ---            | ---                 | 8.34                | 9.30                        |
| Kif1b         | up         | 1.95        | 7.60E-04 | chr4(-):148550431-148681844  | <a href="#">UCSC</a> | kinesin family membe       | A530096N05Rik // D4M1e // Kif    | AB023656                     | 16561          | ENSMUSG00000063077  | 8.17                | 9.13                        |
| ---           | up         | 1.95        | 4.57E-02 | chr4(+):31923208-31926070    | <a href="#">UCSC</a> | ---                        | ---                              | AK029559                     | ---            | ---                 | 7.54                | 8.51                        |
| ---           | up         | 1.95        | 6.34E-03 | chr3(-):107535977-107540869  | <a href="#">UCSC</a> | ---                        | ---                              | AK076420                     | ---            | ---                 | 5.49                | 6.46                        |
| ---           | up         | 1.95        | 4.74E-02 | chr2(-):60690036-60692497    | <a href="#">UCSC</a> | ---                        | ---                              | AK028585                     | ---            | ---                 | 5.86                | 6.82                        |
| Cdc42ep2      | up         | 1.95        | 2.31E-02 | chr19(+):5916128-5924817     | <a href="#">UCSC</a> | CDC42 effector protei      | 1110008C05Rik // Borg1 // Cep2   | AK030304                     | 104252         | ENSMUSG00000045664  | 8.01                | 8.97                        |
| D030074K08Rik | up         | 1.95        | 2.73E-02 | chr15(-):93118326-93121230   | <a href="#">UCSC</a> | RIKEN cDNA D03007          | ---                              | AK083749                     | ---            | ---                 | 7.21                | 8.17                        |
| ---           | up         | 1.95        | 8.66E-03 | chr11(-):80581699-80585486   | <a href="#">UCSC</a> | ---                        | ---                              | AK085124                     | ---            | ---                 | 6.49                | 7.46                        |
| ---           | up         | 1.95        | 2.64E-02 | chr11(-):46181573-46188485   | <a href="#">UCSC</a> | ---                        | ---                              | AK138049                     | ---            | ---                 | 8.30                | 9.26                        |
| Mgl1          | up         | 1.94        | 3.16E-02 | chr6(+):88674425-88778351    | <a href="#">UCSC</a> | monoglyceride lipase       | Magl                             | AJ011118                     | 23945          | ENSMUSG00000033174  | 7.19                | 8.15                        |
| ---           | up         | 1.94        | 3.25E-02 | chr19(-):5920971-5923294     | <a href="#">UCSC</a> | ---                        | ---                              | AK048173                     | ---            | ---                 | 6.24                | 7.19                        |
| ---           | up         | 1.93        | 2.10E-02 | chr10(+):3435489-3441640     | <a href="#">UCSC</a> | ---                        | ---                              | AK137924                     | ---            | ---                 | 7.19                | 8.15                        |
| ---           | up         | 1.93        | 5.22E-03 | chr1(-):132982829-132988726  | <a href="#">UCSC</a> | ---                        | ---                              | AK142966                     | ---            | ---                 | 8.14                | 9.09                        |
| Spry4         | up         | 1.93        | 4.54E-02 | chr18(-):38745926-38761073   | <a href="#">UCSC</a> | sprouty homolog 4 (D       | A030006O18Rik // sprouty4        | BC057005                     | 24066          | ENSMUSG00000024427  | 7.25                | 8.20                        |
| Litaf         | up         | 1.93        | 3.31E-02 | chr16(-):10958952-10993216   | <a href="#">UCSC</a> | LPS-induced TN facto       | 3222402J11Rik // N4WBP3 // Ne    | AK078708                     | 56722          | ENSMUSG00000022500  | 10.95               | 11.90                       |
| Tmem63a       | up         | 1.93        | 3.24E-02 | chr1(+):182872596-182905234  | <a href="#">UCSC</a> | transmembrane protei       | MGC11687 // MGC25803             | AK144899                     | 208785         | ENSMUSG00000026519  | 9.79                | 10.74                       |
| Syne2         | up         | 1.93        | 4.86E-02 | chr12(+):76919304-77024005   | <a href="#">UCSC</a> | synaptic nuclear enve      | 6820449306Rik // D12Etdf777e     | AK148252                     | 319565         | ENSMUSG00000063450  | 6.95                | 7.90                        |
| Nudt4         | up         | 1.93        | 4.57E-02 | chr10(-):95009922-95026782   | <a href="#">UCSC</a> | nudix (nucleoside diph     | 4933436C10Rik // DIP2P // DIPF   | AK048062                     | 71207          | ENSMUSG00000020029  | 9.87                | 10.82                       |
| Mxd1          | up         | 1.92        | 3.16E-02 | chr6(-):86598976-86619153    | <a href="#">UCSC</a> | MAX dimerization prot      | Mad // Mad1                      | AK151305                     | 17119          | ENSMUSG             |                     |                             |

Supplementary Table S1. List of the 997 Regulated Genes of AML mice treated with ABT-737(Fold-change  $\geq 1.5$ ; P-Value  $\leq 0.05$ ); 764 upregulated and 233 downregulated genes.

GEO Accession No.: GSE48601

| Gene Symbol   | Regulation | Fold-Change | P-Value  | Gene Coordinates (hg19)      | UCSC Link            | Gene Name               | Aliases and Synonyms              | Representative Transcript ID | Entrez Gene ID | Ensembl ID         | Intensity NRAS-BCL2 | Intensity NRAS-BCL2 ABT-737 |
|---------------|------------|-------------|----------|------------------------------|----------------------|-------------------------|-----------------------------------|------------------------------|----------------|--------------------|---------------------|-----------------------------|
| Gm13710       | up         | 1.91        | 4.50E-02 | chr2(-):84340905-84374031    | <a href="#">UCSC</a> | predicted gene 13710    | ---                               | AK044106                     | 672763         | ENSMUSG00000087362 | 7.59                | 8.52                        |
| ---           | up         | 1.91        | 3.40E-02 | chr18(+):46930978-46932725   | <a href="#">UCSC</a> | ---                     | ---                               | AK052104                     | ---            | ---                | 6.78                | 7.72                        |
| ---           | up         | 1.91        | 1.54E-02 | chr18(+):5005688-5008692     | <a href="#">UCSC</a> | ---                     | ---                               | AK084185                     | ---            | ---                | 6.63                | 7.56                        |
| Fer           | up         | 1.91        | 2.16E-03 | chr17(+):64215329-64488843   | <a href="#">UCSC</a> | fer (fms/fps related)   | pc330004K01Rik // Fer1 // Fer2    | BC058100                     | 14158          | ENSMUSG0000000127  | 6.25                | 7.18                        |
| Gm14636       | up         | 1.90        | 2.86E-03 | chr7(+):18744107-18744370    | <a href="#">UCSC</a> | predicted gene 14636    | ENSMUSG00000073274                | AK170409                     | ---            | ---                | 6.40                | 7.33                        |
| Snapc5        | up         | 1.90        | 3.41E-02 | chr8(+):64028346-64030490    | <a href="#">UCSC</a> | small nuclear RNA ac    | 2010103A03Rik                     | AK007634                     | 330959         | ENSMUSG00000032398 | 6.84                | 7.77                        |
| ---           | up         | 1.90        | 4.26E-02 | chr7(-):13555677-135560834   | <a href="#">UCSC</a> | ---                     | ---                               | AK137948                     | ---            | ---                | 6.50                | 7.43                        |
| ---           | up         | 1.90        | 2.56E-02 | chr7(-):117943947-117944975  | <a href="#">UCSC</a> | ---                     | ---                               | BC051516                     | ---            | ---                | 7.47                | 8.40                        |
| Ecm1          | up         | 1.90        | 9.24E-03 | chr3(-):95538071-95543494    | <a href="#">UCSC</a> | extracellular matrix pr | p85                               | AK169939                     | 13601          | ENSMUSG00000028108 | 8.43                | 9.36                        |
| ---           | up         | 1.90        | 4.78E-02 | chr14(-):78959157-78962636   | <a href="#">UCSC</a> | ---                     | ---                               | AK047588                     | ---            | ---                | 6.37                | 7.30                        |
| C630004H02Rik | up         | 1.90        | 2.14E-02 | chr11(-):115209021-115229040 | <a href="#">UCSC</a> | RIKEN cDNA C63000       | ---                               | AK138882                     | 217310         | ENSMUSG00000034586 | 7.61                | 8.54                        |
| ---           | up         | 1.89        | 4.97E-02 | chrX(+):23320539-23322321    | <a href="#">UCSC</a> | ---                     | ---                               | AK155735                     | ---            | ---                | 6.48                | 7.40                        |
| Rab11fip1     | up         | 1.89        | 2.06E-03 | chr8(-):28249770-28285119    | <a href="#">UCSC</a> | RAB11 family interact   | 2010200K21Rik // 4833414G05F      | AK030769                     | 75767          | ENSMUSG00000031488 | 6.83                | 9.56                        |
| Rab20         | up         | 1.89        | 1.48E-02 | chr8(-):11453392-11478716    | <a href="#">UCSC</a> | RAB20, member RAS       | D8Erd350e                         | AK163743                     | 19332          | ENSMUSG00000031504 | 7.82                | 8.74                        |
| Atp1a3        | up         | 1.89        | 3.24E-02 | chr7(-):25763190-25790956    | <a href="#">UCSC</a> | ATPase, Na+/K+ trans    | Atpa-2 // MGC:27631 // MGC:38     | BC020177                     | 202975         | ENSMUSG00000040907 | 9.14                | 10.05                       |
| Ilgfb2        | up         | 1.89        | 2.33E-02 | chr10(+):76930392-77028453   | <a href="#">UCSC</a> | Integrin beta 2         | ZE6 // Cdr1b // Mac-1beta         | AK161236                     | 16414          | ENSMUSG00000000290 | 10.88               | 11.80                       |
| ---           | up         | 1.89        | 2.47E-02 | chr2(+):117248514-117252234  | <a href="#">UCSC</a> | ---                     | ---                               | AK137791                     | ---            | ---                | 5.86                | 6.77                        |
| 2810455808Rik | up         | 1.89        | 4.45E-02 | chr16(-):31173760-31174971   | <a href="#">UCSC</a> | RIKEN cDNA 2810455      | ---                               | AK013351                     | ---            | ---                | 8.29                | 9.21                        |
| ---           | up         | 1.89        | 1.83E-02 | chr15(+):74837732-74854840   | <a href="#">UCSC</a> | ---                     | ---                               | AK085263                     | ---            | ---                | 6.50                | 7.42                        |
| AV320309      | up         | 1.89        | 2.81E-02 | chr12(-):85206142-85207301   | <a href="#">UCSC</a> | expressed sequence A    | ---                               | AK142013                     | ---            | ---                | 7.80                | 8.71                        |
| Gm10456       | up         | 1.88        | 4.03E-02 | chrX(+):99246187-99267307    | <a href="#">UCSC</a> | predicted gene 10456    | ---                               | AK158124                     | ---            | ENSMUSG00000073037 | 7.04                | 7.95                        |
| Gm10382       | up         | 1.88        | 2.77E-02 | chr5(+):125869691-125870924  | <a href="#">UCSC</a> | predicted gene 10382    | EG639281                          | AK132914                     | ---            | ENSMUSG00000072612 | 6.96                | 7.88                        |
| ---           | up         | 1.88        | 4.44E-02 | chr5(+):121835531-121837110  | <a href="#">UCSC</a> | ---                     | ---                               | AK132740                     | ---            | ---                | 5.84                | 6.76                        |
| ---           | up         | 1.88        | 3.15E-02 | chr4(+):18024764-18027497    | <a href="#">UCSC</a> | ---                     | ---                               | AK034862                     | ---            | ---                | 5.87                | 6.78                        |
| Fam63a        | up         | 1.88        | 4.36E-02 | chr3(+):95085766-95100099    | <a href="#">UCSC</a> | family with sequence    | 1810005H09Rik // 493054E06R       | AK169673                     | 75007          | ENSMUSG00000078645 | 8.23                | 9.14                        |
| ---           | up         | 1.88        | 1.16E-03 | chr2(+):68851699-68852536    | <a href="#">UCSC</a> | ---                     | ---                               | AK178428                     | ---            | ---                | 6.71                | 7.62                        |
| ---           | up         | 1.88        | 1.30E-02 | chr19(+):24614754-2463008    | <a href="#">UCSC</a> | ---                     | ---                               | AK143465                     | ---            | ---                | 6.91                | 7.82                        |
| ---           | up         | 1.88        | 4.12E-03 | chr12(-):32685769-32689892   | <a href="#">UCSC</a> | ---                     | ---                               | AK142349                     | ---            | ---                | 5.96                | 6.87                        |
| Cd68          | up         | 1.88        | 3.44E-02 | chr11(-):69477715-69479655   | <a href="#">UCSC</a> | CD68 antigen            | gp110 // macroialin // Scard1     | X68273                       | 12514          | ENSMUSG00000018774 | 10.47               | 11.38                       |
| ---           | up         | 1.88        | 2.05E-02 | chr1(+):66858889-66861069    | <a href="#">UCSC</a> | ---                     | ---                               | AK087152                     | ---            | ---                | 6.07                | 6.98                        |
| ---           | up         | 1.87        | 1.88E-03 | chr8(+):63502830-63504067    | <a href="#">UCSC</a> | ---                     | ---                               | AK142998                     | ---            | ---                | 5.23                | 6.14                        |
| ---           | up         | 1.87        | 3.07E-02 | chr7(-):81536525-81538036    | <a href="#">UCSC</a> | ---                     | ---                               | AK048580                     | ---            | ---                | 7.67                | 8.58                        |
| Megf9         | up         | 1.87        | 6.78E-03 | chr4(+):70091925-70095432    | <a href="#">UCSC</a> | multiple EGF-like-dom   | 4933405H16Rik // Egfl5 // mKlAa   | AK155926                     | 230316         | ENSMUSG00000039270 | 6.35                | 7.25                        |
| ---           | up         | 1.87        | 2.10E-02 | chr19(+):55847320-55849810   | <a href="#">UCSC</a> | ---                     | ---                               | AK084192                     | ---            | ---                | 6.08                | 6.99                        |
| Map3k9        | up         | 1.87        | 2.47E-02 | chr12(-):82822576-82882162   | <a href="#">UCSC</a> | mitogen-activated pro   | E130314H24Rik // Mik1             | AK155677                     | 338372         | ENSMUSG00000042724 | 7.03                | 7.93                        |
| Abcc3         | up         | 1.87        | 4.06E-03 | chr1(-):94204610-94254311    | <a href="#">UCSC</a> | ATP-binding cassette    | 1700019L09Rik // MRP3             | AK172420                     | 76408          | ENSMUSG00000020865 | 8.03                | 8.93                        |
| Olf373        | up         | 1.86        | 1.89E-03 | chr8(+):74893961-74924605    | <a href="#">UCSC</a> | olfactory receptor 373  | GA_x6K02T2NUPS-231686-232         | BC119445                     | 258532         | ENSMUSG00000081561 | 6.20                | 7.10                        |
| ---           | up         | 1.86        | 2.81E-02 | chr7(+):1204078-124817091    | <a href="#">UCSC</a> | ---                     | ---                               | AK028406                     | ---            | ---                | 7.44                | 8.34                        |
| ---           | up         | 1.86        | 2.14E-02 | chr7(+):90781881-90784327    | <a href="#">UCSC</a> | ---                     | ---                               | AK085487                     | ---            | ---                | 9.78                | 10.67                       |
| Tlr6          | up         | 1.86        | 3.07E-02 | chr5(-):65344339-65351288    | <a href="#">UCSC</a> | toll-like receptor 6    | ---                               | AK154253                     | 21899          | ENSMUSG00000051498 | 7.15                | 8.05                        |
| ---           | up         | 1.86        | 1.43E-02 | chr2(-):60631115-60633239    | <a href="#">UCSC</a> | ---                     | ---                               | AK037924                     | ---            | ---                | 6.51                | 7.41                        |
| ---           | up         | 1.86        | 8.12E-03 | chr16(-):90984152-90987482   | <a href="#">UCSC</a> | ---                     | ---                               | AK044844                     | ---            | ---                | 8.48                | 9.38                        |
| ---           | up         | 1.85        | 4.43E-02 | chrX(+):126884289-126886828  | <a href="#">UCSC</a> | ---                     | ---                               | AK053195                     | ---            | ---                | 5.70                | 6.58                        |
| Adrb2         | up         | 1.85        | 1.97E-02 | chr8(+):56090638-56093135    | <a href="#">UCSC</a> | adrenergic receptor, b  | Adrb-2 // Badm // beta2-adrenoce  | AK043213                     | ---            | ---                | 6.32                | 7.20                        |
| Socs3         | up         | 1.85        | 1.51E-02 | chr18(-):62337471-62339635   | <a href="#">UCSC</a> | suppressor of cytokine  | CIS3 // Cish3 // cytokine-inducib | AK080276                     | 11556          | ENSMUSG00000045790 | 9.48                | 10.37                       |
| ---           | up         | 1.85        | 1.18E-03 | chr11(-):117827403-117830501 | <a href="#">UCSC</a> | ---                     | ---                               | AK139241                     | 12702          | ENSMUSG00000053113 | 9.05                | 9.94                        |
| ---           | up         | 1.84        | 6.04E-03 | chr10(-):95235116-9526424    | <a href="#">UCSC</a> | ---                     | ---                               | AK084897                     | ---            | ---                | 8.20                | 9.08                        |
| ---           | up         | 1.84        | 2.52E-02 | chr2(-):17823492-178240617   | <a href="#">UCSC</a> | ---                     | ---                               | AK159445                     | ---            | ---                | 6.49                | 7.36                        |
| ---           | up         | 1.84        | 3.59E-02 | chr17(-):46868636-46870217   | <a href="#">UCSC</a> | ---                     | ---                               | AK087286                     | ---            | ---                | 6.38                | 7.24                        |
| Lrrc6         | up         | 1.84        | 1.56E-02 | chr15(-):66211421-66332456   | <a href="#">UCSC</a> | leucine rich repeat co  | L RTP                             | BC046277                     | 54562          | ENSMUSG00000022375 | 6.38                | 7.26                        |
| ---           | up         | 1.84        | 4.09E-02 | chr15(-):53156578-53160207   | <a href="#">UCSC</a> | ---                     | ---                               | AK035801                     | ---            | ---                | 8.09                | 8.97                        |
| ---           | up         | 1.83        | 2.52E-02 | chr6(-):86613182-86615545    | <a href="#">UCSC</a> | ---                     | ---                               | AK157959                     | ---            | ---                | 8.64                | 9.51                        |
| Hspa4l        | up         | 1.83        | 1.78E-02 | chr3(+):40549302-40595803    | <a href="#">UCSC</a> | heat shock protein 4    | h94kDa // APG-1 // Osp94          | BC110662                     | 18415          | ENSMUSG00000025757 | 6.31                | 7.18                        |
| ---           | up         | 1.83        | 8.80E-03 | chr3(+):27978112-27981430    | <a href="#">UCSC</a> | ---                     | ---                               | AK086672                     | ---            | ---                | 6.22                | 7.09                        |
| Qsox1         | up         | 1.83        | 4.42E-02 | chr1(-):157625289-157659983  | <a href="#">UCSC</a> | quiescin Q6 sulfhydry   | 1300003H02Rik // Qscn6            | BC076590                     | 104009         | ENSMUSG00000033684 | 9.06                | 9.93                        |
| ---           | up         | 1.83        | 1.80E-02 | chr11(+):120495080-120496439 | <a href="#">UCSC</a> | ---                     | ---                               | AK163532                     | ---            | ---                | 7.24                | 8.11                        |
| ---           | up         | 1.82        | 4.77E-04 | chr9(+):100995190-100996802  | <a href="#">UCSC</a> | ---                     | ---                               | AK051940                     | ---            | ---                | 6.75                | 7.62                        |
| ---           | up         | 1.82        | 1.32E-02 | chr5(-):138642904-138644726  | <a href="#">UCSC</a> | ---                     | ---                               | AK080008                     | ---            | ---                | 7.10                | 7.97                        |
| ---           | up         | 1.82        | 4.13E-02 | chr4(+):31245110-31246804    | <a href="#">UCSC</a> | ---                     | ---                               | AK157471                     | ---            | ---                | 7.11                | 7.98                        |
| Fhl3          | up         | 1.82        | 4.37E-02 | chr4(+):124377979-124385314  | <a href="#">UCSC</a> | four and a half LIM do  | ---                               | BC145939                     | 14201          | ENSMUSG00000032643 | 8.77                | 9.63                        |
| BC027582      | up         | 1.82        | 3.69E-02 | chr3(-):10335603-103356476   | <a href="#">UCSC</a> | cDNA sequence BC02      | ---                               | BC027582                     | ---            | ---                | 6.20                | 7.06                        |
| ---           | up         | 1.82        | 4.95E-02 | chr18(+):46924868-46929762   | <a href="#">UCSC</a> | ---                     | ---                               | AK088507                     | ---            | ---                | 7.43                | 8.29                        |
| ---           | up         | 1.82        | 1.20E-02 | chr15(-):51714272-51715375   | <a href="#">UCSC</a> | ---                     | ---                               | AK089171                     | ---            | ---                | 7.43                | 8.30                        |
| A730061H03Rik | up         | 1.82        | 4.16E-02 | chr14(-):56177937-56179245   | <a href="#">UCSC</a> | RIKEN cDNA A73006       | ---                               | AK049078                     | ---            | ENSMUSG00000053588 | 6.83                | 7.69                        |
| ---           | up         | 1.81        | 3.92E-02 | chr10(+):127543367-127543909 | <a href="#">UCSC</a> | ---                     | ---                               | AK021046                     | ---            | ---                | 6.31                | 7.17                        |
| Rhobtb1       | up         | 1.81        | 4.25E-02 | chr10(+):68671300-68725730   | <a href="#">UCSC</a> | Rho-related BTB dom     | 1700008H16Rik // 3110048G13F      | AK005770                     | 69288          | ENSMUSG00000019944 | 7.38                | 8.64                        |
| Ipcefl        | up         | 1.81        | 6.28E-03 | chr10(+):3366075-3460176     | <a href="#">UCSC</a> | interaction protein for | A130090K04Rik                     | AK220339                     | 320495         | ENSMUSG00000064065 | 8.87                | 9.73                        |
| ---           | up         | 1.81        | 2.29E-02 | chr2(-):128137420-128141735  | <a href="#">UCSC</a> | ---                     | ---                               | AK157535                     | ---            | ---                | 6.37                | 7.22                        |
| Snai1         | up         | 1.81        | 4.82E-02 | chr2(+):167363702-167369314  | <a href="#">UCSC</a> | snail homolog 1 (Dros   | Sna // Sna1 // Snail // Snail1    | AK144478                     | 20613          | ENSMUSG00000042821 | 7.43                | 8.28                        |
| ---           | up         | 1.81        | 4.31E-02 | chr17(+):25699256-256972403  | <a href="#">UCSC</a> | ---                     | ---                               | AK153778                     | ---            | ---                | 6.65                | 7.51                        |
| ---           | up         | 1.81        | 4.61E-02 | chr15(-):64055063-64059359   | <a href="#">UCSC</a> | ---                     | ---                               | AK141775                     | ---            | ---                | 6.98                | 7.82                        |
| Rnasel        | up         | 1.81        | 1.56E-02 | chr1(+):15559655-155611347   | <a href="#">UCSC</a> | ribonuclease L (2', 5'  | -c2-5A-dependent)RNAse // E230    | AK140815                     | 24014          | ENSMUSG00000066800 | 8.16                | 9.02                        |
| ---           | up         | 1.80        | 3.68E-02 | chr6(+):12859613-128597117   | <a href="#">UCSC</a> | ---                     | ---                               | AK187487                     | ---            | ---                | 10.43               | 11.28                       |
| ---           | up         | 1.80        | 4.03E-02 | chr10(+):3868347-38691639    | <a href="#">UCSC</a> | ---                     | ---                               | AK148977                     | ---            | ---                | 5.17                | 6.02                        |
| Apfat9        | up         | 1.80        | 2.78E-02 | chr5(+):101275149-101328120  | <a href="#">UCSC</a> | 1-acylglycerol-3-phos   | 4933407I02Rik // A230097K15R      | BC096769                     | 231510         | ENSMUSG00000029314 | 6.95                | 7.75                        |
| Csf1          | up         | 1.80        | 2.24E-02 | chr3(-):107543975-10756      |                      |                         |                                   |                              |                |                    |                     |                             |

Supplementary Table S1. List of the 997 Regulated Genes of AML mice treated with ABT-737(Fold-change  $\geq 1.5$ ; P-Value  $\leq 0.05$ ); 764 upregulated and 233 downregulated genes.

GEO Accession No.: GSE48601

| Gene Symbol            | Regulation | Fold-Change | P-Value  | Gene Coordinates (hg19)      | UCSC Link | Gene Name                | Aliases and Synonyms              | Representative Transcript ID | Entrez Gene ID   | Ensembl ID            | Intensity NRAS-BCL2 | Intensity NRAS-BCL2 ABT-737 |
|------------------------|------------|-------------|----------|------------------------------|-----------|--------------------------|-----------------------------------|------------------------------|------------------|-----------------------|---------------------|-----------------------------|
| 2510042O18Rik          | up         | 1.79        | 4.07E-02 | chr12(-):82818818-82821039   | UCSC      | ---                      | ---                               | BC036387                     | ---              | ---                   | 8.90                | 9.73                        |
| Cpeb2                  | up         | 1.79        | 2.28E-02 | chr10(-):58979548-58980426   | UCSC      | RIKEN cDNA 251004        | ---                               | AK011095                     | ---              | ---                   | 7.64                | 8.48                        |
| Man1c1                 | up         | 1.78        | 3.15E-02 | chr5(+):43625165-43680960    | UCSC      | cytoplasmic polyaden     | A630055H10Rik                     | AK042065                     | 231207           | ENSMUSG00000039782    | 8.50                | 9.33                        |
| Ar                     | up         | 1.78        | 4.81E-02 | chr4(-):134117605-134260205  | UCSC      | mannosidase, alpha-      | ---                               | BC067023                     | 230815           | ENSMUSG00000037306    | 9.16                | 9.99                        |
| Ppp1r3b                | up         | 1.77        | 1.62E-02 | chr4(+):36345011-36513456    | UCSC      | androgen receptor        | ---                               | AK133547                     | 11835            | ENSMUSG00000046532    | 6.72                | 7.64                        |
| Dmd                    | up         | 1.77        | 2.90E-02 | chr8(+):36438784-36451178    | UCSC      | protein phosphatase 1    | GL                                | BG079666                     | 244416           | ENSMUSG00000046794    | 7.16                | 7.99                        |
| 4632428N05Rik          | up         | 1.77        | 8.82E-03 | chr7(+):19661909-19668125    | UCSC      | dystrophia myotonica-    | 59 / Dm9 // DMR-N9                | SE0312                       | 13401            | ENSMUSG00000030410    | 7.68                | 8.50                        |
| Sfxn5                  | up         | 1.77        | 4.51E-02 | chr10(+):59809651-59893042   | UCSC      | RIKEN cDNA 463242        | ---                               | AK162635                     | 74048            | ENSMUSG00000020101    | 10.95               | 11.78                       |
| Gm12703                | up         | 1.77        | 1.57E-02 | chr6(-):85163048-85283415    | UCSC      | sideroflexin 5           | C230001H08Rik                     | AK082073                     | 94282            | ENSMUSG00000033720    | 8.11                | 8.93                        |
| ---                    | up         | 1.77        | 1.35E-02 | chr4(-):94696654-94715063    | UCSC      | predicted gene 12703     | ---                               | AK086407                     | 100039265        | ENSMUSG00000052767    | 7.06                | 7.88                        |
| ---                    | up         | 1.77        | 2.74E-02 | chr3(+):89897073-89898942    | UCSC      | ---                      | ---                               | AK040628                     | ---              | ---                   | 8.67                | 9.49                        |
| ---                    | up         | 1.77        | 4.14E-02 | chr2(+):13335759-13337900    | UCSC      | ---                      | ---                               | AK154824                     | ---              | ---                   | 6.56                | 7.38                        |
| Polim7                 | up         | 1.77        | 1.34E-02 | chr13(-):55597156-55614799   | UCSC      | PDZ and LIM domain       | 1110003B01Rik // 2410002J21R      | AK033091                     | 67399            | ENSMUSG00000021493    | 8.35                | 9.17                        |
| Ccl4                   | up         | 1.77        | 2.69E-02 | chr11(+):83476087-83478182   | UCSC      | chemokine (C-C motif)    | Act-2 // AT744.1 // MIP-1B // MIP | M23503                       | 20303            | ENSMUSG00000018930    | 7.16                | 7.99                        |
| Gm7256                 | up         | 1.77        | 4.72E-02 | chr1(+):30929515-30930320    | UCSC      | predicted gene 7256      | ---                               | BC029811                     | 638995           | ---                   | 5.95                | 6.77                        |
| B930049P21Rik          | up         | 1.76        | 3.41E-02 | chr6(+):89472447-89474162    | UCSC      | RIKEN cDNA B93004        | ---                               | AK047332                     | ---              | ---                   | 7.51                | 8.33                        |
| Dab2ip                 | up         | 1.76        | 1.26E-02 | chr2(+):35414093-35586514    | UCSC      | disabled homolog 2 (C    | 2310011D08Rik // mKIAA1743        | DQ473307                     | 69601            | ENSMUSG00000026883    | 7.71                | 8.53                        |
| ---                    | up         | 1.76        | 2.94E-02 | chr17(-):80591212-80593493   | UCSC      | ---                      | ---                               | AK046325                     | ---              | ---                   | 5.65                | 6.47                        |
| Anxa11                 | up         | 1.76        | 1.46E-02 | chr14(+):26661656-26706290   | UCSC      | annexin A11              | A830099O17Rik // Anx11            | U65986                       | 11744            | ENSMUSG00000021866    | 10.12               | 10.94                       |
| ---                    | up         | 1.76        | 4.14E-02 | chr14(+):26667996-26669480   | UCSC      | ---                      | ---                               | AK082026                     | ---              | ---                   | 5.94                | 6.76                        |
| Rap1gap2               | up         | 1.76        | 4.04E-02 | chr1(-):74196986-74424419    | UCSC      | RAP1 GTPase activat      | Garnl4 // LOC380710 // mKIAA1     | AK147290                     | 380711           | ENSMUSG00000038807    | 8.50                | 9.31                        |
| Nbeal2                 | up         | 1.75        | 1.03E-02 | chr9(-):110527376-110556646  | UCSC      | neurobeachin-like 2      | 1110014F23Rik // mKIAA0540        | BC172118                     | 235627           | ENSMUSG00000056724    | 9.03                | 9.84                        |
| ---                    | up         | 1.75        | 2.66E-02 | chr9(+):72904556-72906495    | UCSC      | ---                      | ---                               | AK035248                     | ---              | ---                   | 6.88                | 7.68                        |
| ---                    | up         | 1.75        | 4.44E-02 | chr7(+):75218326-75220020    | UCSC      | ---                      | ---                               | AK138254                     | ---              | ---                   | 6.59                | 7.40                        |
| ---                    | up         | 1.75        | 4.03E-02 | chr6(+):70166849-70167156    | UCSC      | ---                      | ---                               | X75398                       | ---              | ---                   | 11.09               | 11.90                       |
| ---                    | up         | 1.75        | 1.93E-02 | chr5(+):67783389-67785597    | UCSC      | ---                      | ---                               | AK052138                     | ---              | ---                   | 7.08                | 7.89                        |
| Fry                    | up         | 1.75        | 1.78E-02 | chr5(+):115121185-1151216263 | UCSC      | furry homolog (Drosop    | eg303186A19Rik // eg003           | AK035256                     | 320365           | ENSMUSG00000056602    | 6.47                | 7.28                        |
| Rgs3                   | up         | 1.75        | 1.13E-02 | chr4(+):62220881-62365035    | UCSC      | regulator of G-protein   | A4930506N09Rik // C2pa // C2Pa    | AJ250999                     | 50780            | ENSMUSG00000059810    | 9.27                | 10.08                       |
| Mocs1                  | up         | 1.75        | 3.99E-02 | chr17(+):49567687-49594754   | UCSC      | molybdenum cofactor      | 3110045D15Rik                     | AK157231                     | 56738            | ENSMUSG00000064120    | 9.18                | 9.99                        |
| ---                    | up         | 1.75        | 1.94E-02 | chr16(-):5027866-5028477     | UCSC      | ---                      | ---                               | AK049088                     | ---              | ---                   | 7.19                | 8.00                        |
| ---                    | up         | 1.75        | 1.27E-02 | chr12(-):85156282-85160896   | UCSC      | ---                      | ---                               | AK142124                     | ---              | ---                   | 7.86                | 8.66                        |
| ---                    | up         | 1.74        | 4.95E-02 | chr6(-):99334601-99338493    | UCSC      | ---                      | ---                               | AK042037                     | ---              | ---                   | 7.11                | 7.92                        |
| Igk-V21-2 // Igk-V21-4 | up         | 1.74        | 2.51E-02 | chr6(+):70165394-70676751    | UCSC      | immunoglobulin kappa     | (kappa)21A                        | X05877                       | 626347 // 626583 | 0000076600 // ENSMUSG | 12.38               | 13.18                       |
| IgJ                    | up         | 1.74        | 5.89E-03 | chr5(-):88949540-88956874    | UCSC      | immunoglobulin joinin    | 9533009F24Rik // Jch // Jchain    | AK078865                     | 16069            | ENSMUSG00000067149    | 11.94               | 12.74                       |
| ---                    | up         | 1.74        | 4.45E-02 | chr5(-):65481954-65482865    | UCSC      | ---                      | ---                               | AK050605                     | ---              | ---                   | 7.20                | 8.00                        |
| ---                    | up         | 1.74        | 3.37E-02 | chr5(+):122858499-122861083  | UCSC      | ---                      | ---                               | AK049864                     | ---              | ---                   | 7.12                | 7.92                        |
| ---                    | up         | 1.74        | 2.19E-04 | chr3(-):142042593-142044813  | UCSC      | ---                      | ---                               | AK089997                     | ---              | ---                   | 8.91                | 9.70                        |
| ---                    | up         | 1.74        | 3.63E-02 | chr17(+):86364818-86367514   | UCSC      | ---                      | ---                               | AK143128                     | ---              | ---                   | 8.55                | 9.35                        |
| C030046I01Rik          | up         | 1.74        | 3.78E-02 | chr10(-):79372798-79379751   | UCSC      | RIKEN cDNA C03004        | ---                               | AK088107                     | 102824           | ENSMUSG00000035781    | 10.29               | 11.09                       |
| Gm11123                | up         | 1.73        | 3.88E-02 | chrX(+):103255564-103257555  | UCSC      | predicted gene 11123     | ---                               | AK157679                     | ---              | ---                   | 7.12                | 7.91                        |
| ---                    | up         | 1.73        | 9.70E-03 | chr10(-):12672100-12675887   | UCSC      | ---                      | ---                               | AK037271                     | ---              | ---                   | 7.68                | 8.47                        |
| Ggt1                   | up         | 1.73        | 3.14E-02 | chr10(+):75031407-75048935   | UCSC      | gamma-glutamyltrans      | CD224 // dwg // GGT // Ggtp       | AK079235                     | 14598            | ENSMUSG00000006345    | 7.79                | 8.58                        |
| ---                    | up         | 1.73        | 4.90E-02 | chr7(+):56849811-56862514    | UCSC      | ---                      | ---                               | BC026601                     | ---              | ---                   | 8.23                | 9.02                        |
| ---                    | up         | 1.73        | 5.54E-03 | chr6(-):70067072-70067359    | UCSC      | ---                      | ---                               | U29575                       | ---              | ---                   | 10.99               | 11.78                       |
| 2900056B19Rik          | up         | 1.73        | 1.16E-02 | chr5(-):103154151-103154852  | UCSC      | RIKEN cDNA 290005        | ---                               | AK013703                     | ---              | ---                   | 6.17                | 6.96                        |
| Rbm47                  | up         | 1.73        | 3.59E-02 | chr5(-):66409848-66543147    | UCSC      | RNA binding motif pro    | 9533007J19Rik // MGC:18900        | AK170082                     | 245945           | ENSMUSG00000070780    | 7.94                | 8.73                        |
| Lrrc8d                 | up         | 1.73        | 8.74E-03 | chr5(+):106129987-106244226  | UCSC      | leucine rich repeat co   | 2810473G09Rik // 4930525N13R      | AK137459                     | 231549           | ENSMUSG00000046079    | 8.69                | 9.48                        |
| ---                    | up         | 1.73        | 4.98E-02 | chr2(+):120427579-120428785  | UCSC      | ---                      | ---                               | AK149564                     | ---              | ---                   | 6.82                | 7.62                        |
| ---                    | up         | 1.73        | 3.05E-02 | chr2(+):48975855-48978283    | UCSC      | ---                      | ---                               | AK034737                     | ---              | ---                   | 8.92                | 9.71                        |
| Pygm                   | up         | 1.73        | 4.45E-02 | chr19(+):6384429-6398458     | UCSC      | muscle glycogen phos     | ---                               | AF124787                     | 19309            | ENSMUSG00000032648    | 7.46                | 8.25                        |
| Lyst                   | up         | 1.73        | 1.47E-02 | chr13(+):13682661-13871067   | UCSC      | lysosomal trafficking r  | D13Sik13                          | U70015                       | 17101            | ENSMUSG00000019726    | 9.82                | 10.61                       |
| ---                    | up         | 1.73        | 4.70E-03 | chr12(+):112398557-112401305 | UCSC      | ---                      | ---                               | AK089901                     | ---              | ---                   | 7.23                | 8.02                        |
| E030047P09Rik          | up         | 1.73        | 4.77E-02 | chr12(+):103602678-103605338 | UCSC      | RIKEN cDNA E03004        | ---                               | AK156527                     | ---              | ---                   | 7.73                | 8.52                        |
| ---                    | up         | 1.72        | 3.50E-02 | chr8(+):117346549-117351689  | UCSC      | ---                      | ---                               | AK079493                     | ---              | ---                   | 7.01                | 7.79                        |
| Ctsd                   | up         | 1.72        | 2.16E-02 | chr7(-):149561816-149573806  | UCSC      | cathepsin D              | CatD // CD                        | AK093885                     | 13033            | ENSMUSG00000007891    | 11.12               | 11.91                       |
| Xylt1                  | up         | 1.72        | 1.63E-04 | chr7(+):124524492-124811142  | UCSC      | xylosyltransferase 1     | ---                               | BC157033                     | ---              | ---                   | 9.81                | 10.60                       |
| Camk2n1                | up         | 1.72        | 2.82E-02 | chr4(+):138011101-138014058  | UCSC      | calcium/calmodulin-de    | 1810006K23Rik // CaMKIIINalphe    | AY523601                     | 66259            | ENSMUSG00000046447    | 5.86                | 6.64                        |
| Slc2a6                 | up         | 1.72        | 3.43E-02 | chr2(-):26876895-26893511    | UCSC      | solute carrier family 2  | F630103L12Rik // Glut6            | AK089246                     | 227659           | ENSMUSG00000030607    | 8.71                | 9.49                        |
| 803043L12Rik           | up         | 1.72        | 6.76E-03 | chr1(+):132980851-132981313  | UCSC      | RIKEN cDNA 803044        | ---                               | AK020200                     | ---              | ---                   | 8.22                | 9.00                        |
| Gm10345                | up         | 1.72        | 4.98E-02 | chr16(+):78124864-78127325   | UCSC      | predicted gene 10345     | 1700010G02Rik                     | GU144514                     | 100041269        | ENSMUSG00000071724    | 7.97                | 8.75                        |
| ---                    | up         | 1.72        | 3.02E-02 | chr11(+):29903130-29904519   | UCSC      | ---                      | ---                               | AK053026                     | ---              | ---                   | 6.47                | 7.25                        |
| ---                    | up         | 1.71        | 2.67E-02 | chr9(+):59728324-59729885    | UCSC      | ---                      | ---                               | AK142353                     | ---              | ---                   | 6.80                | 7.57                        |
| Pafah1b3               | up         | 1.71        | 3.10E-02 | chr7(-):26080066-26082974    | UCSC      | platelet-activating fact | mus[g] // Pafahg                  | U57746                       | 18476            | ENSMUSG00000005447    | 9.48                | 10.25                       |
| ---                    | up         | 1.71        | 1.34E-02 | chr10(+):57820114-57824772   | UCSC      | ---                      | ---                               | AK141104                     | ---              | ---                   | 7.99                | 8.77                        |
| ---                    | up         | 1.71        | 4.37E-02 | chr6(-):69676567-69676837    | UCSC      | ---                      | ---                               | X70264                       | ---              | ---                   | 12.34               | 13.12                       |
| ---                    | up         | 1.71        | 2.27E-02 | chr6(+):68469185-68469441    | UCSC      | ---                      | ---                               | U29593                       | ---              | ---                   | 10.76               | 11.53                       |
| ---                    | up         | 1.71        | 1.12E-02 | chr2(+):68729441-68733029    | UCSC      | ---                      | ---                               | AK083008                     | ---              | ---                   | 6.12                | 6.90                        |
| Tsga10                 | up         | 1.71        | 4.84E-02 | chr1(-):37811621-37922145    | UCSC      | testis specific 10       | 4933432N21Rik // Mtsga10          | BC066782                     | 211484           | ENSMUSG00000060771    | 6.81                | 7.58                        |
| B930069K15Rik          | up         | 1.71        | 4.27E-02 | chr11(+):105996132-105999643 | UCSC      | RIKEN cDNA B93006        | ---                               | AK081024                     | ---              | ---                   | 7.86                | 8.63                        |
| 943009F02Rik           | up         | 1.71        | 2.65E-02 | chr11(+):51980322-51941281   | UCSC      | RIKEN cDNA 943009        | ---                               | AK035193                     | ---              | ---                   | 8.34                | 9.12                        |
| ---                    | up         | 1.70        | 3.89E-02 | chrX(+):12854447-128546092   | UCSC      | ---                      | ---                               | AK047731                     | ---              | ---                   | 8.91                | 9.67                        |
| Aph1c                  | up         | 1.70        | 1.86E-02 | chr9(-):66662817-66682528    | UCSC      | anterior pharynx defec   | 0610008A10Rik                     | BC063254                     | 68318            | ENSMUSG00000053040    | 8.00                | 8.77                        |
| DBErd158e              | up         | 1.70        | 4.41E-02 | chr8(+):111261493-111266700  | UCSC      | DNA segment, Chr 8,      | ---                               | AK142804                     | ---              | ---                   | 6.43                | 7.19                        |
| 9130230L23Rik          | up         | 1.70        | 1.42E-02 | chr5(-):66370597-66395525    | UCSC      | RIKEN cDNA 913023        | ---                               | AK033717                     | 231253           | ENSMUSG00000054598    | 6.76                | 7.52                        |
| ---                    | up         | 1.70        | 2.18E-02 | chr3(-):142049564-142051871  | UCSC      | ---                      | ---                               | AK051662                     | ---              | ---                   | 7.97                | 8.74                        |
| ---                    | up         | 1.70        | 2.68E-02 | chr2(-):59731151-59734695    | UCSC      | ---                      | ---                               | AK082531                     | ---              | ---                   | 5.98                | 6.75                        |
| ---                    | up         |             |          |                              |           |                          |                                   |                              |                  |                       |                     |                             |

Supplementary Table S1. List of the 997 Regulated Genes of AML mice treated with ABT-737(Fold-change ≥ 1.5; P-Value ≤ 0.05); 764 upregulated and 233 downregulated genes.

GEO Accession No.: GSE48601

| Gene Symbol       | Regulation | Fold-Change | P-Value  | Gene Coordinates (hg19)      | UCSC Link | Gene Name                                                        | Aliases and Synonyms                 | Representative Transcript ID | Entrez Gene ID | Ensembl ID           | Intensity NRAS-BCL2 | Intensity NRAS-BCL2 ABT-737 |
|-------------------|------------|-------------|----------|------------------------------|-----------|------------------------------------------------------------------|--------------------------------------|------------------------------|----------------|----------------------|---------------------|-----------------------------|
| Gm15832/Rnf149    | up         | 1.69        | 3.57E-02 | chr1(c):39604433-39634252    | UCSC      | predicted gene 15832                                             | 1600023E10Rik // Grelu4              | AK155360                     | 67702          | 000048234 // ENSMUSG | 9.46                | 10.22                       |
| ---               | up         | 1.69        | 2.11E-02 | chr16(+):45198870-45200311   | UCSC      | ---                                                              | ---                                  | AK142053                     | ---            | ---                  | 6.62                | 7.38                        |
| Trb1              | up         | 1.69        | 2.71E-02 | chr15(+):59479904-59488654   | UCSC      | tribbles homolog 1 (Drosophila)                                  | A53009015Rik // Trb1                 | AK028626                     | 211770         | ENSMUSG00000032501   | 9.01                | 9.77                        |
| Gpr137b-ps        | up         | 1.69        | 2.13E-02 | chr13(-):12707325-12742662   | UCSC      | G protein-coupled receptor class B group 3                       | ENSMUSG00000075118                   | AF154337                     | 664862         | ENSMUSG00000075118   | 9.42                | 10.18                       |
| B230327D02Rik     | up         | 1.69        | 3.21E-02 | chr2(-):85252301-8525226     | UCSC      | RIKEN cDNA B23032                                                | ---                                  | AK053939                     | ---            | ---                  | 7.60                | 8.36                        |
| Plk36             | up         | 1.69        | 4.81E-02 | chr11(+):68316583-68366199   | UCSC      | phosphoinositide-3-kinase                                        | ---                                  | AK169948                     | 104709         | ENSMUSG00000046207   | 8.23                | 8.98                        |
| ---               | up         | 1.68        | 1.63E-02 | chr6(-):3275742-3277855      | UCSC      | ---                                                              | ---                                  | AK138008                     | ---            | ---                  | 6.92                | 7.67                        |
| ---               | up         | 1.68        | 8.00E-03 | chr4(+):115489112-115490999  | UCSC      | ---                                                              | ---                                  | AK046632                     | ---            | ---                  | 6.65                | 7.40                        |
| Fnip2             | up         | 1.68        | 2.13E-02 | chr3(-):79259896-79304444    | UCSC      | folliculin interacting protein                                   | D630023B12Rik // mKlAA1450           | ---                          | ---            | ENSMUSG00000061175   | 7.79                | 8.54                        |
| ---               | up         | 1.68        | 1.72E-02 | chr19(+):45146756-45148927   | UCSC      | ---                                                              | ---                                  | AK035482                     | ---            | ---                  | 5.98                | 6.73                        |
| Apol8             | up         | 1.68        | 8.86E-03 | chr15(-):77578229-77587413   | UCSC      | apolipoprotein L 8                                               | 9833006J20Rik // Apol2               | AK046043                     | 239552         | ENSMUSG00000056656   | 7.41                | 8.16                        |
| ---               | up         | 1.68        | 4.80E-03 | chr11(-):51397429-51398155   | UCSC      | ---                                                              | ---                                  | AK050077                     | ---            | ---                  | 7.48                | 8.23                        |
| Fes               | up         | 1.67        | 3.41E-02 | chr7(-):87522642-87532845    | UCSC      | feline sarcoma oncogene c-fes                                    | ---                                  | BC038130                     | 14159          | ENSMUSG00000053158   | 8.92                | 9.67                        |
| 2610306D10Rik     | up         | 1.67        | 2.44E-02 | chr7(+):135682446-135683057  | UCSC      | RIKEN cDNA 2610306                                               | ---                                  | AK012000                     | ---            | ---                  | 8.74                | 9.47                        |
| Izumot1 // Rasip1 | up         | 1.67        | 4.34E-03 | chr7(+):52977181-52984463    | UCSC      | izumo sperm-egg fusion                                           | 1700058F15Rik // 261025P08R          | AK156602                     | 69903 // 73456 | 000044562 // ENSMUSG | 7.11                | 7.95                        |
| ---               | up         | 1.67        | 2.31E-02 | chr6(+):70264897-70265190    | UCSC      | ---                                                              | ---                                  | X63807                       | ---            | ---                  | 12.37               | 13.11                       |
| ---               | up         | 1.67        | 3.30E-02 | chr5(-):20636894-20637842    | UCSC      | ---                                                              | ---                                  | AK155887                     | ---            | ---                  | 5.94                | 6.68                        |
| D5Erd255e         | up         | 1.67        | 1.74E-02 | chr5(+):119053829-119055139  | UCSC      | DNA segment, Chr 5,                                              | ---                                  | AK157080                     | ---            | ---                  | 7.15                | 7.89                        |
| ---               | up         | 1.67        | 4.19E-02 | chr5(+):98460614-98463024    | UCSC      | ---                                                              | ---                                  | AK085795                     | ---            | ---                  | 6.18                | 6.92                        |
| ---               | up         | 1.67        | 1.72E-03 | chr2(-):73301402-73303562    | UCSC      | ---                                                              | ---                                  | AK047286                     | ---            | ---                  | 8.46                | 9.20                        |
| ---               | up         | 1.67        | 1.90E-02 | chr1(-):99980446-99981786    | UCSC      | ---                                                              | ---                                  | AK149050                     | ---            | ---                  | 6.24                | 6.98                        |
| Slca9a3r2         | up         | 1.67        | 4.73E-02 | chr17(-):24776233-24787251   | UCSC      | solute carrier family 9                                          | 0610011L07Rik // 1200011K07R         | AK084801                     | 65962          | ENSMUSG00000020504   | 7.76                | 8.50                        |
| Card10            | up         | 1.67        | 3.17E-02 | chr15(-):78605586-78633472   | UCSC      | caspase recruitment domain 10                                    | Bimp1 // CARMA3                      | BC060203                     | 105844         | ENSMUSG00000033170   | 7.65                | 8.39                        |
| Naip2             | up         | 1.67        | 2.31E-02 | chr13(-):100914018-100972047 | UCSC      | NLR family, apoptosis                                            | Birc1b // Naip-rs6 // Naip2          | AY147001                     | 17948          | ENSMUSG00000078945   | 8.36                | 9.10                        |
| E230032D23Rik     | up         | 1.66        | 1.41E-02 | chr7(+):150813978-150856919  | UCSC      | RIKEN cDNA E23003                                                | ---                                  | AK155734                     | ---            | ---                  | 7.08                | 7.81                        |
| ---               | up         | 1.66        | 4.42E-02 | chr6(+):58643462-58644855    | UCSC      | ---                                                              | ---                                  | AK136811                     | ---            | ---                  | 5.95                | 6.68                        |
| Ufsp1             | up         | 1.66        | 2.10E-03 | chr5(+):137735876-137736892  | UCSC      | UFM1-specific peptidase                                          | 2700038N03Rik // D5Erd655e           | BC087958                     | 70240          | ENSMUSG00000051502   | 6.87                | 7.60                        |
| ---               | up         | 1.66        | 1.68E-02 | chr18(+):44792017-44793420   | UCSC      | ---                                                              | ---                                  | AK082442                     | ---            | ---                  | 7.69                | 8.42                        |
| Aim               | up         | 1.66        | 2.22E-02 | chr17(+):12959885-12960936   | UCSC      | antisense ltr2 RNA                                               | 2810051F02Rik // 2810434M15R         | AK081743                     | 104103         | ENSMUSG00000064070   | 6.30                | 7.03                        |
| Prr13             | up         | 1.66        | 4.12E-03 | chr15(+):102289602-102293240 | UCSC      | proline rich 13                                                  | 1110020C13Rik // 2010324E2R          | AK003650                     | 66151          | ENSMUSG00000023048   | 10.25               | 10.98                       |
| ---               | up         | 1.66        | 1.02E-02 | chr13(+):110612954-110617992 | UCSC      | ---                                                              | ---                                  | AK143709                     | ---            | ---                  | 6.80                | 7.53                        |
| ---               | up         | 1.66        | 2.82E-02 | chr11(-):29675390-29676571   | UCSC      | ---                                                              | ---                                  | AK052982                     | ---            | ---                  | 6.50                | 7.24                        |
| Trpm2             | up         | 1.66        | 3.88E-02 | chr10(-):77371672-77432599   | UCSC      | transient receptor potential cation channel subfamily 6 member 2 | 9830168K16Rik // LTRPC2 // TRP       | AB166747                     | 28240          | ENSMUSG00000009292   | 7.40                | 8.13                        |
| Slc6a8            | up         | 1.65        | 4.18E-02 | chrX(+):70918489-70927837    | UCSC      | solute carrier family 6 member 8                                 | Creat // CRT                         | AF459435                     | 102857         | ENSMUSG00000019558   | 7.19                | 7.91                        |
| ---               | up         | 1.65        | 3.41E-02 | chr7(-):107104174-107107511  | UCSC      | ---                                                              | ---                                  | AK143127                     | ---            | ---                  | 7.41                | 8.13                        |
| Scn1b             | up         | 1.65        | 1.81E-02 | chr7(-):31901543-31912053    | UCSC      | sodium channel, voltage-gated, type 1, beta                      | ---                                  | BC039140                     | 20266          | ENSMUSG00000019194   | 7.12                | 7.84                        |
| ---               | up         | 1.65        | 4.78E-02 | chr5(+):150933186-150956902  | UCSC      | ---                                                              | ---                                  | AK083968                     | ---            | ---                  | 6.99                | 7.61                        |
| 1700056E22Rik     | up         | 1.65        | 1.95E-02 | chr1(-):18585691-185857453   | UCSC      | RIKEN cDNA 1700056                                               | ---                                  | AK006811                     | 73363          | ENSMUSG00000044854   | 6.94                | 7.66                        |
| Fcer1g            | up         | 1.65        | 2.06E-02 | chr1(-):173159709-173164438  | UCSC      | Fc receptor, IgE, high affinity                                  | Fcrg // FcR-gamma // FcRgamma        | AK155600                     | 14127          | ENSMUSG00000058715   | 12.05               | 12.77                       |
| ---               | up         | 1.65        | 4.63E-02 | chr2(-):152639986-152643242  | UCSC      | ---                                                              | ---                                  | AK029192                     | ---            | ---                  | 6.27                | 6.99                        |
| ---               | up         | 1.65        | 2.19E-02 | chr16(+):19198647-19260937   | UCSC      | ---                                                              | ---                                  | AY170594                     | ---            | ---                  | 11.36               | 12.08                       |
| Il18r1            | up         | 1.65        | 6.32E-03 | chr1(+):40522396-40557698    | UCSC      | interleukin 18 receptor                                          | Il18ralpha // Il18rp                 | AK170705                     | 16182          | ENSMUSG00000026070   | 7.72                | 8.44                        |
| B4gal3            | up         | 1.65        | 1.24E-02 | chr1(+):173200473-173207027  | UCSC      | UDP-Gal-4-epimerase                                              | 9530061M23Rik // beta4Gal-III        | AK155471                     | 57370          | ENSMUSG00000052423   | 8.75                | 9.46                        |
| ---               | up         | 1.65        | 3.84E-02 | chr13(-):51769165-51771231   | UCSC      | ---                                                              | ---                                  | AK140531                     | ---            | ---                  | 6.87                | 7.60                        |
| ---               | up         | 1.65        | 4.83E-02 | chr11(-):106252163-106255073 | UCSC      | ---                                                              | ---                                  | AK135003                     | ---            | ---                  | 6.73                | 7.45                        |
| Atg7              | up         | 1.64        | 3.12E-02 | chr6(+):114593142-114810630  | UCSC      | autophagy-related 7                                              | 11810013K23Rik // Apg7               | AK146992                     | 74244          | ENSMUSG00000030314   | 9.09                | 9.81                        |
| Pde8a             | up         | 1.64        | 3.67E-02 | chr7(+):88398479-88479417    | UCSC      | phosphodiesterase 8A                                             | Pde8                                 | AK148238                     | 18584          | ENSMUSG00000025584   | 8.63                | 9.34                        |
| ---               | up         | 1.64        | 1.08E-02 | chr6(+):89713346-89713635    | UCSC      | ---                                                              | ---                                  | M34528                       | ---            | ---                  | 12.27               | 12.99                       |
| Il17ra            | up         | 1.64        | 1.83E-02 | chr6(+):120413244-120433747  | UCSC      | interleukin 17 receptor                                          | Il17 // VDw217                       | AK080226                     | 16172          | ENSMUSG00000028897   | 10.15               | 10.87                       |
| Orai2             | up         | 1.64        | 8.04E-03 | chr5(-):136623334-136646526  | UCSC      | ORAI calcium release-activated calcium receptor 2                | A73004015Rik // Tmem142b             | AK042940                     | 269717         | ENSMUSG00000039747   | 7.12                | 7.84                        |
| 5830438M01Rik     | up         | 1.64        | 6.99E-04 | chr16(+):32303213-32304580   | UCSC      | RIKEN cDNA 5830438                                               | ---                                  | AK017980                     | ---            | ---                  | 6.10                | 6.81                        |
| 9130004J05Rik     | up         | 1.64        | 3.11E-02 | chr15(+):64118016-64120310   | UCSC      | RIKEN cDNA 9130004                                               | ---                                  | AK159040                     | ---            | ENSMUSG00000078299   | 7.82                | 8.54                        |
| Pde1b             | up         | 1.64        | 4.96E-03 | chr15(+):103333465-103360483 | UCSC      | phosphodiesterase 1B                                             | ---                                  | BC058531                     | 18574          | ENSMUSG00000022489   | 8.04                | 8.75                        |
| ---               | up         | 1.64        | 4.71E-02 | chr14(-):66798243-66799682   | UCSC      | ---                                                              | ---                                  | AK040874                     | ---            | ---                  | 7.46                | 8.18                        |
| ---               | up         | 1.64        | 2.88E-02 | chr13(-):102507346-102511389 | UCSC      | ---                                                              | ---                                  | AK161087                     | ---            | ---                  | 8.16                | 8.88                        |
| ---               | up         | 1.64        | 3.17E-02 | chr1(+):141070245-141075537  | UCSC      | ---                                                              | ---                                  | AK087124                     | ---            | ---                  | 6.69                | 7.40                        |
| ---               | up         | 1.64        | 4.02E-03 | chr1(+):91701105-91702223    | UCSC      | ---                                                              | ---                                  | AK080524                     | ---            | ---                  | 7.50                | 8.21                        |
| ---               | up         | 1.64        | 2.30E-02 | chr11(+):33981900-33985365   | UCSC      | ---                                                              | ---                                  | AK051631                     | ---            | ---                  | 6.36                | 7.08                        |
| Gm                | up         | 1.64        | 2.46E-02 | chr11(+):102291795-102298127 | UCSC      | granulin                                                         | acroggranulin // epithelin // PCcell | AK018744                     | 14824          | ENSMUSG00000034708   | 10.96               | 11.67                       |
| ---               | up         | 1.63        | 5.48E-03 | chrX(-):57480170-57481662    | UCSC      | ---                                                              | ---                                  | AK043987                     | ---            | ---                  | 6.16                | 6.87                        |
| ---               | up         | 1.63        | 3.07E-02 | chr9(-):113879102-113880119  | UCSC      | ---                                                              | ---                                  | AK016042                     | ---            | ---                  | 7.42                | 8.12                        |
| Gm10621           | up         | 1.63        | 4.58E-02 | chr9(+):108551059-108553284  | UCSC      | predicted gene 10621                                             | ---                                  | AK155210                     | 100038635      | ENSMUSG00000074075   | 7.76                | 8.47                        |
| Dapk2             | up         | 1.63        | 3.07E-02 | chr9(+):66006041-66120047    | UCSC      | death-associated protein 2                                       | ---                                  | AB018002                     | 13143          | ENSMUSG00000032380   | 7.12                | 7.82                        |
| ---               | up         | 1.63        | 4.42E-02 | chr7(+):142735400-142737651  | UCSC      | ---                                                              | ---                                  | AK037215                     | ---            | ---                  | 7.59                | 8.29                        |
| Rab7              | up         | 1.63        | 5.66E-03 | chr6(-):87949104-87959527    | UCSC      | RAB7, member RAS subfamily                                       | ---                                  | AK148117                     | 19349          | ENSMUSG00000079477   | 8.93                | 9.63                        |
| Antxr2            | up         | 1.63        | 1.26E-02 | chr5(-):98311802-98460062    | UCSC      | anthrax toxin receptor                                           | 2310046B19Rik // cl-35 // CMG-2      | AK166124                     | 17914          | ENSMUSG00000029338   | 9.63                | 10.33                       |
| Cxcl10            | up         | 1.63        | 4.76E-03 | chr5(-):92775667-92777916    | UCSC      | chemokine (C-X-C motif) subfamily 10                             | C7 // CRG-2 // gIP-10 // Ili10       | AK152967                     | 15945          | ENSMUSG00000034855   | 8.16                | 8.86                        |
| ---               | up         | 1.63        | 2.61E-02 | chr4(-):59530855-59533322    | UCSC      | ---                                                              | ---                                  | AK077900                     | ---            | ---                  | 7.73                | 8.44                        |
| Pla2g2e           | up         | 1.63        | 8.82E-03 | chr4(+):138433857-138438730  | UCSC      | phospholipase A2, group IIb                                      | GIIeSPLA2s                           | AF112984                     | 26870          | ENSMUSG00000028751   | 7.54                | 8.25                        |
| Lrsam1            | up         | 1.63        | 1.20E-02 | chr2(-):32780742-32816771    | UCSC      | leucine rich repeat domain 1                                     | MGC:56830                            | AK049146                     | 227739         | ENSMUSG00000026792   | 7.07                | 7.78                        |
| ---               | up         | 1.63        | 2.55E-02 | chr2(+):131846942-131849651  | UCSC      | ---                                                              | ---                                  | AK042504                     | ---            | ---                  | 7.01                | 7.72                        |
| ---               | up         | 1.63        | 1.78E-02 | chr19(-):9939414-9943485     | UCSC      | ---                                                              | ---                                  | AK084060                     | ---            | ---                  | 6.50                | 7.21                        |
| Vps37c            | up         | 1.63        | 2.44E-02 | chr19(+):10763223-10789117   | UCSC      | vacuolar protein sorting domain 37c                              | 5730409F24Rik                        | AK158833                     | 107305         | ENSMUSG00000048832   | 8.21                | 8.92                        |
| Slc14a1           | up         | 1.63        | 3.63E-02 | chr18(-):78296831-78338859   | UCSC      | solute carrier family 14 member 1                                | 2610507K20Rik // 3021401A05R         | AK041979                     | 108052         | ENSMUSG00000059336   | 8.10                | 8.81                        |
| ---               | up         | 1.63        | 1.57E-02 | chr1(-):52841534-52845677    | UCSC      | ---                                                              | ---                                  | AK042597                     | ---            | ---                  | 7.39                | 8.09                        |
| Ets2              | up         | 1.63        | 3.96     |                              |           |                                                                  |                                      |                              |                |                      |                     |                             |



Supplementary Table S1. List of the 997 Regulated Genes of AML mice treated with ABT-737(Fold-change ≥ 1.5; P-Value ≤ 0.05); 764 upregulated and 233 downregulated genes.

GEO Accession No.: GSE48601

| Gene Symbol             | Regulation | Fold-Change | P-Value  | Gene Coordinates (hg19)      | UCSC Link | Gene Name                                              | Aliases and Synonyms                                   | Representative Transcript ID | Entrez Gene ID  | Ensembl ID           | Intensity NRAS-BCL2 | Intensity NRAS-BCL2 ABT-737 |
|-------------------------|------------|-------------|----------|------------------------------|-----------|--------------------------------------------------------|--------------------------------------------------------|------------------------------|-----------------|----------------------|---------------------|-----------------------------|
| Capn2                   | up         | 1.62        | 1.48E-02 | chr1(+):60834133-60835127    | UCSC      | capn2                                                  | ---                                                    | AK037749                     | ---             | ---                  | 8.96                | 9.66                        |
| Capn2                   | up         | 1.62        | 4.03E-02 | chr1(-):184397387-184447741  | UCSC      | capn2                                                  | Capa-2 // Capa2 // m-calpain                           | D38117                       | 12334           | ENSMUSG00000026509   | 9.29                | 9.99                        |
| Orm2                    | up         | 1.62        | 6.78E-03 | chr4(+):63023508-63026912    | UCSC      | orosomucoid 2                                          | Orm-2                                                  | BC057985                     | 18406           | ENSMUSG000000061540  | 7.89                | 8.59                        |
| Atp11b                  | up         | 1.62        | 2.89E-02 | chr3(+):35653056-35755196    | UCSC      | ATPase, class VI, type 11                              | ATPase, class VI, type 11                              | AK129248                     | 76295           | ENSMUSG000000037400  | 10.32               | 11.02                       |
| Hcd11                   | up         | 1.62        | 2.84E-03 | chr7(+):23810575-23812451    | UCSC      | host cell factor C1 regulator                          | host cell factor C1 regulator                          | AK13438                      | 35202           | ENSMUSG00000023304   | 8.85                | 9.55                        |
| Synj1                   | up         | 1.62        | 1.75E-02 | chr16(-):90960737-91011310   | UCSC      | synapoptin 1                                           | synapoptin 1                                           | AK080946                     | 104015          | ENSMUSG00000022973   | 8.76                | 9.40                        |
| Fam135a                 | up         | 1.62        | 2.21E-02 | chr1(-):24017934-24107181    | UCSC      | family with sequence class member 135A                 | family with sequence class member 135A                 | BC070446                     | 68187           | ENSMUSG00000026153   | 8.70                | 7.45                        |
| Numb                    | up         | 1.62        | 8.20E-03 | chr12(-):85134984-85262808   | UCSC      | numb gene homolog (m-numb / mmb)                       | numb gene homolog (m-numb / mmb)                       | BC033459                     | 18222           | ENSMUSG000000021224  | 9.93                | 10.62                       |
| 610010K14Rik // RnaseH1 | up         | 1.62        | 4.88E-03 | chr11(-):70048710-70053349   | UCSC      | RIKEN cDNA 610011                                      | RIKEN cDNA 610011                                      | BC012258                     | 104457 // 52898 | 000020831 // ENSMUSG | 9.58                | 10.28                       |
| Pls1                    | up         | 1.61        | 4.12E-02 | chr9(-):95653065-95745681    | UCSC      | plastin 1 (Hs isoform)                                 | Himbrin                                                | AK133070                     | 102502          | ENSMUSG00000049493   | 6.99                | 7.68                        |
| ---                     | up         | 1.61        | 4.93E-02 | chr8(+):101609804-101612304  | UCSC      | ---                                                    | ---                                                    | AK148860                     | ---             | ---                  | 6.81                | 7.50                        |
| Zswim4                  | up         | 1.61        | 2.90E-03 | chr8(-):86734577-86760955    | UCSC      | zinc finger, SWIM domain containing 4                  | zinc finger, SWIM domain containing 4                  | AK053663                     | 212168          | ENSMUSG00000035671   | 8.34                | 9.02                        |
| ---                     | up         | 1.61        | 3.74E-02 | chr8(-):34970895-34973443    | UCSC      | ---                                                    | ---                                                    | AK033637                     | ---             | ---                  | 7.09                | 7.78                        |
| D83004416Rik            | up         | 1.61        | 2.37E-02 | chr7(-):134115234-134119613  | UCSC      | RIKEN cDNA D83004                                      | ---                                                    | AK086910                     | 381922          | ENSMUSG00000087483   | 7.29                | 7.97                        |
| Derf3                   | up         | 1.61        | 4.02E-02 | chr10(+):75356143-75358696   | UCSC      | Derf1-like domain family member 3                      | Derf1-like domain family member 3                      | AB047555                     | 70377           | ENSMUSG00000009092   | 10.38               | 11.07                       |
| ---                     | up         | 1.61        | 4.98E-02 | chr4(+):41087787-41108894    | UCSC      | ---                                                    | ---                                                    | AK136940                     | ---             | ---                  | 7.79                | 8.48                        |
| Nup210l                 | up         | 1.61        | 1.88E-02 | chr3(+):89908054-89971908    | UCSC      | nucleoporin 210-like                                   | nucleoporin 210-like                                   | AK019752                     | 77596           | ENSMUSG00000027939   | 6.82                | 7.51                        |
| CD59b                   | up         | 1.61        | 1.95E-04 | chr2(+):103909962-103931345  | UCSC      | CD59b antigen                                          | CD59b antigen                                          | BC038128                     | 333883          | ENSMUSG00000006866   | 6.50                | 7.19                        |
| ---                     | up         | 1.61        | 1.66E-02 | chr1(-):13344564-13346811    | UCSC      | ---                                                    | ---                                                    | AK079436                     | ---             | ---                  | 7.72                | 8.41                        |
| Klf10                   | up         | 1.61        | 1.26E-02 | chr15(-):38221219-38230464   | UCSC      | Kruppel-like factor 10                                 | Egral // Gdnf // mGIF // Tieg1                         | AK043433                     | 21847           | ENSMUSG00000037465   | 8.68                | 9.37                        |
| Cyb5r1                  | up         | 1.61        | 3.30E-02 | chr1(+):136302358-136308315  | UCSC      | cytochrome b5 reductase 1                              | cytochrome b5 reductase 1                              | BC016266                     | 72017           | ENSMUSG00000026456   | 8.50                | 9.18                        |
| ---                     | up         | 1.60        | 1.46E-02 | chr9(+):66109962-66111564    | UCSC      | ---                                                    | ---                                                    | AK136641                     | ---             | ---                  | 6.42                | 7.10                        |
| Insr                    | up         | 1.60        | 1.30E-02 | chr8(-):3095058-3279552      | UCSC      | insulin receptor                                       | 4932439J01Rik // CD220 // D63003                       | BC172640                     | 16337           | ENSMUSG00000005534   | 8.18                | 8.85                        |
| Osgin1                  | up         | 1.60        | 2.27E-02 | chr8(+):121961062-121970155  | UCSC      | oxidative stress inducible protein 1                   | oxidative stress inducible protein 1                   | BC022135                     | 71839           | ENSMUSG00000074063   | 7.71                | 8.39                        |
| ---                     | up         | 1.60        | 6.24E-03 | chr7(-):28423287-28424331    | UCSC      | ---                                                    | ---                                                    | BC104146                     | ---             | ---                  | 7.69                | 8.37                        |
| ---                     | up         | 1.60        | 1.27E-02 | chr8(+):66875674-66879407    | UCSC      | ---                                                    | ---                                                    | AK136394                     | ---             | ---                  | 7.41                | 8.09                        |
| ---                     | up         | 1.60        | 4.70E-02 | chr6(+):21943235-21946479    | UCSC      | ---                                                    | ---                                                    | AK084370                     | ---             | ---                  | 6.59                | 7.27                        |
| Thap6                   | up         | 1.60        | 2.57E-02 | chr5(+):92391414-92401090    | UCSC      | THAP domain containing protein 6                       | THAP domain containing protein 6                       | BC089377                     | 381650          | ENSMUSG000000060466  | 7.37                | 8.05                        |
| ---                     | up         | 1.60        | 1.38E-02 | chr4(+):116862548-116863496  | UCSC      | ---                                                    | ---                                                    | AK154548                     | ---             | ---                  | 6.91                | 7.59                        |
| ---                     | up         | 1.60        | 1.13E-02 | chr3(-):27511373-27514902    | UCSC      | ---                                                    | ---                                                    | AK142096                     | ---             | ---                  | 6.50                | 7.17                        |
| A930010G16Rik           | up         | 1.60        | 1.93E-02 | chr2(-):4939492-4940852      | UCSC      | RIKEN cDNA A93001                                      | C430048F02Rik                                          | AK020843                     | ---             | ---                  | 7.98                | 8.66                        |
| Trp53np2                | up         | 1.60        | 1.40E-03 | chr2(+):155207554-155215582  | UCSC      | transformation related protein 53                      | transformation related protein 53                      | AK170132                     | 68728           | ENSMUSG00000038375   | 9.94                | 10.61                       |
| 2010002N04Rik           | up         | 1.60        | 1.38E-03 | chr18(-):60633847-60661641   | UCSC      | RIKEN cDNA 2010002                                     | cl-41 // Nid67                                         | AK143383                     | 106878          | ENSMUSG00000038059   | 8.55                | 9.23                        |
| C230073G13Rik           | up         | 1.60        | 3.43E-02 | chr17(+):71202103-71206299   | UCSC      | RIKEN cDNA C23007                                      | ---                                                    | AK082636                     | ---             | ---                  | 7.72                | 8.40                        |
| ---                     | up         | 1.60        | 1.94E-02 | chr16(+):23989161-23992539   | UCSC      | ---                                                    | ---                                                    | AK149722                     | ---             | ---                  | 7.69                | 8.37                        |
| ---                     | up         | 1.60        | 4.55E-02 | chr1(+):196819454-196822389  | UCSC      | ---                                                    | ---                                                    | AK148519                     | ---             | ---                  | 7.24                | 7.92                        |
| Arl1                    | up         | 1.60        | 2.22E-02 | chr14(+):9198990-91990773    | UCSC      | ADP-ribosylation factor 1L                             | ADP-ribosylation factor 1L                             | BC060993                     | 219144          | ENSMUSG00000043157   | 7.67                | 8.35                        |
| Sam8                    | up         | 1.60        | 3.01E-04 | chr14(+):22569752-22617947   | UCSC      | sterile alpha motif domain containing 8                | sterile alpha motif domain containing 8                | AK147528                     | 67630           | ENSMUSG00000021770   | 8.06                | 8.74                        |
| Gpr137b                 | up         | 1.60        | 3.24E-02 | chr13(+):13448980-13485891   | UCSC      | G protein-coupled receptor class C group 1 member 137b | G protein-coupled receptor class C group 1 member 137b | AK080884                     | 83924           | ENSMUSG00000021306   | 10.88               | 11.56                       |
| Ccdc88c                 | up         | 1.60        | 3.74E-03 | chr12(-):102149734-102267269 | UCSC      | coiled-coil domain containing 88c                      | coiled-coil domain containing 88c                      | BC063255                     | 68339           | ENSMUSG00000021182   | 9.48                | 10.16                       |
| F7                      | up         | 1.59        | 4.45E-02 | chr8(+):13026033-13035809    | UCSC      | coagulation factor VII                                 | C7 // FVII // mFVII                                    | AK154742                     | 14068           | ENSMUSG00000031443   | 7.29                | 7.96                        |
| Arrb1                   | up         | 1.59        | 2.16E-02 | chr7(+):106683974-106755281  | UCSC      | arrestin, beta 1                                       | 1200006117Rik // beta-arrestin1                        | AK147566                     | 109689          | ENSMUSG00000018909   | 9.54                | 10.21                       |
| Vsig10l                 | up         | 1.59        | 8.14E-03 | chr7(+):50726428-50727383    | UCSC      | ZV-set and immunoglobulin domain containing 10         | ZV-set and immunoglobulin domain containing 10         | AK008908                     | 75690           | ENSMUSG00000070604   | 9.04                | 9.70                        |
| ---                     | up         | 1.59        | 7.20E-03 | chr5(+):123109748-123111574  | UCSC      | ---                                                    | ---                                                    | AK086885                     | ---             | ---                  | 6.54                | 7.21                        |
| Gm10459                 | up         | 1.59        | 2.29E-02 | chr5(+):33994749-33995904    | UCSC      | predicted gene 10459                                   | predicted gene 10459                                   | AK132920                     | ---             | ---                  | 6.84                | 7.51                        |
| Optrn                   | up         | 1.59        | 3.77E-02 | chr2(-):4941688-4989091      | UCSC      | optineurin                                             | 4930441O07Rik // FTIIIA-INTP                           | BC061185                     | 71648           | ENSMUSG00000026672   | 7.29                | 7.95                        |
| Tmem63b                 | up         | 1.59        | 3.44E-03 | chr17(-):80979855-81127396   | UCSC      | transmembrane protein 63b                              | transmembrane protein 63b                              | AK159673                     | 224807          | ENSMUSG00000036026   | 8.60                | 9.27                        |
| Lims1                   | up         | 1.59        | 2.28E-02 | chr15(+):9698904-96705849    | UCSC      | LIM domain and actin-binding domain containing 1       | LIM domain and actin-binding domain containing 1       | AK049550                     | 65970           | ENSMUSG00000023022   | 6.96                | 7.53                        |
| 3100002H20Rik           | up         | 1.59        | 3.34E-03 | chr15(+):72616148-72617516   | UCSC      | RIKEN cDNA 3100002                                     | ---                                                    | AK013917                     | ---             | ---                  | 7.55                | 8.22                        |
| Ahnak2                  | up         | 1.59        | 1.40E-02 | chr12(-):114023209-114040869 | UCSC      | AHNAK nucleoprotein 2                                  | AHNAK nucleoprotein 2                                  | AK138503                     | 100041194       | ENSMUSG00000072812   | 7.23                | 7.89                        |
| 2310058N22Rik           | up         | 1.59        | 2.81E-02 | chr12(+):117617687-117619252 | UCSC      | RIKEN cDNA 2310058                                     | ---                                                    | AK009987                     | ---             | ---                  | 7.49                | 8.16                        |
| Farp2                   | up         | 1.59        | 7.70E-03 | chr1(+):95408654-95518551    | UCSC      | FERM, RhoGEF and domain containing protein 2           | FERM, RhoGEF and domain containing protein 2           | AK050860                     | 227377          | ENSMUSG00000034066   | 6.95                | 7.62                        |
| ---                     | up         | 1.59        | 4.75E-02 | chr11(-):6190873-6191850     | UCSC      | ---                                                    | ---                                                    | AK085849                     | ---             | ---                  | 6.09                | 6.76                        |
| B930032C10Rik           | up         | 1.58        | 4.39E-02 | chr9(+):56821681-56822545    | UCSC      | RIKEN cDNA B93003                                      | ---                                                    | AK047178                     | ---             | ---                  | 6.78                | 7.45                        |
| ---                     | up         | 1.58        | 3.53E-02 | chr6(-):72552998-72555496    | UCSC      | ---                                                    | ---                                                    | AK045661                     | ---             | ---                  | 8.88                | 9.54                        |
| ---                     | up         | 1.58        | 9.81E-04 | chr4(-):14727393-14728408    | UCSC      | ---                                                    | ---                                                    | AK045390                     | ---             | ---                  | 6.62                | 7.28                        |
| ---                     | up         | 1.58        | 3.92E-02 | chr1(-):133901165-133904587  | UCSC      | ---                                                    | ---                                                    | AK086589                     | ---             | ---                  | 7.58                | 8.24                        |
| Map4k3                  | up         | 1.58        | 1.07E-02 | chr17(-):80979855-81127396   | UCSC      | mitogen-activated protein kinase 4                     | mitogen-activated protein kinase 4                     | BC172686                     | 225028          | ENSMUSG00000024242   | 7.96                | 8.63                        |
| Sun2                    | up         | 1.58        | 3.15E-02 | chr15(+):75554401-75572967   | UCSC      | Sad1 and UNC84 domain containing 2                     | Sad1 and UNC84 domain containing 2                     | AK172398                     | 223697          | ENSMUSG00000042524   | 10.59               | 11.25                       |
| ---                     | up         | 1.58        | 3.27E-02 | chr15(+):38448540-38449821   | UCSC      | ---                                                    | ---                                                    | AK070710                     | ---             | ---                  | 7.17                | 7.83                        |
| ---                     | up         | 1.58        | 3.01E-02 | chr11(+):60050099-60051715   | UCSC      | ---                                                    | ---                                                    | AK054085                     | ---             | ---                  | 7.62                | 8.28                        |
| ---                     | up         | 1.57        | 2.85E-02 | chr9(+):58443041-58444380    | UCSC      | ---                                                    | ---                                                    | AK037677                     | ---             | ---                  | 7.02                | 7.68                        |
| D10Erd709e              | up         | 1.57        | 4.62E-02 | chr10(+):110605692-110611969 | UCSC      | DNA segment, Chr 10                                    | ---                                                    | AK155618                     | ---             | ---                  | 9.72                | 10.37                       |
| ---                     | up         | 1.57        | 1.70E-02 | chr7(-):74512602-74515867    | UCSC      | ---                                                    | ---                                                    | AK142457                     | ---             | ---                  | 8.61                | 9.36                        |
| ---                     | up         | 1.57        | 2.37E-02 | chr6(+):145252830-145253703  | UCSC      | ---                                                    | ---                                                    | AK084624                     | ---             | ---                  | 6.40                | 7.04                        |
| 4930509K18Rik           | up         | 1.57        | 2.11E-02 | chr4(+):40260263-40264752    | UCSC      | RIKEN cDNA 4930509                                     | ---                                                    | AK015738                     | 75819           | ENSMUSG000000087137  | 5.54                | 6.19                        |
| Txnp1                   | up         | 1.57        | 7.34E-03 | chr3(+):96361880-96365780    | UCSC      | thioredoxin interacting protein                        | thioredoxin interacting protein                        | AK089403                     | 56338           | ENSMUSG00000038393   | 11.01               | 11.66                       |
| S100a11                 | up         | 1.57        | 1.53E-02 | chr3(+):93324416-93330209    | UCSC      | S100 calcium binding protein 11                        | calgizzarin // Emap1 // S100                           | AK164352                     | 20195           | ENSMUSG00000027907   | 12.71               | 12.76                       |
| 9630019E01Rik           | up         | 1.57        | 1.90E-02 | chr2(-):146227353-146230503  | UCSC      | RIKEN cDNA 9630019                                     | ---                                                    | AK051384                     | ---             | ---                  | 6.12                | 6.78                        |
| A430019L02Rik           | up         | 1.57        | 5.28E-03 | chr18(+):46918210-46921631   | UCSC      | RIKEN cDNA A430019                                     | ---                                                    | AK089650                     | ---             | ---                  | 9.75                | 10.40                       |
| ---                     | up         | 1.57        | 3.67E-02 | chr16(+):84949830-84954283   | UCSC      | ---                                                    | ---                                                    | AK132225                     | ---             | ---                  | 7.42                | 8.07                        |
| Ly6c1                   | up         | 1.57        | 1.94E-02 | chr15(-):74875447-74879260   | UCSC      | lymphocyte antigen 6C                                  | Ly-6C // Ly6c                                          | BC010764                     | 17067           | ENSMUSG00000079018   | 11.89               | 12.54                       |
| ---                     | up         | 1.57        | 1.32E-02 | chr12(-):82815947-82817018   | UCSC      | ---                                                    | ---                                                    | AK049005                     | ---             | ---                  | 8.08                | 8.73                        |
| ---                     | up         | 1.57        | 4.19E-02 | chr11(-):103533947-103535970 | UCSC      | ---                                                    | ---                                                    | AK078572                     | ---             | ---                  | 7.55                | 8.20                        |
| Ddx26b                  | up         | 1.56        | 2        |                              |           |                                                        |                                                        |                              |                 |                      |                     |                             |

Supplementary Table S1. List of the 997 Regulated Genes of AML mice treated with ABT-737(Fold-change  $\geq 1.5$ ; P-Value  $\leq 0.05$ ); 764 upregulated and 233 downregulated genes.

GEO Accession No.: GSE48601

| Gene Symbol                | Regulation | Fold-Change | P-Value  | Gene Coordinates (hg19)      | UCSC Link | Gene Name                                 | Aliases and Synonyms                 | Representative Transcript ID | Entrez Gene ID            | Ensembl ID            | Intensity NRAS-BCL2 | Intensity NRAS-BCL2 ABT-737 |
|----------------------------|------------|-------------|----------|------------------------------|-----------|-------------------------------------------|--------------------------------------|------------------------------|---------------------------|-----------------------|---------------------|-----------------------------|
| ---                        | up         | 1.55        | 4.98E-02 | chr9(-):73762497-73765678    | UCSC      | ---                                       | ---                                  | AK143113                     | ---                       | ---                   | 5.91                | 6.55                        |
| Tcp1l12                    | up         | 1.55        | 2.16E-02 | chr10(+):84039369-84077098   | UCSC      | t-complex 11 (mouse)                      | E430026E19Rik                        | AK146035                     | 216198                    | ENSMUSG00000020034    | 8.97                | 9.60                        |
| Apob4r                     | up         | 1.55        | 3.38E-02 | chr7(+):133728455-133732638  | UCSC      | apolipoprotein B48 related                | Apob-48r                             | AK156422                     | 171504                    | ENSMUSG000000042759   | 7.43                | 8.06                        |
| Len9                       | up         | 1.55        | 4.10E-02 | chr7(+):4100927-4101997      | UCSC      | leukocyte receptor cluster                | 9530024C23Rik // F630035L11R         | AK143899                     | 243813                    | ENSMUSG000000043432   | 7.86                | 8.49                        |
| Ulk1                       | up         | 1.55        | 6.14E-03 | chr5(+):11213507-11239118    | UCSC      | Unc-51 like kinase 1                      | (mKIAA0722 // Unc5.1                 | AK154938                     | 22241                     | ENSMUSG000000029512   | 8.21                | 9.24                        |
| ---                        | up         | 1.55        | 1.39E-02 | chr2(-):128211989-128215224  | UCSC      | ---                                       | ---                                  | AK094958                     | ---                       | ---                   | 6.81                | 7.44                        |
| ---                        | up         | 1.55        | 3.59E-02 | chr2(+):164352390-164355181  | UCSC      | ---                                       | ---                                  | AK162674                     | ---                       | ---                   | 6.42                | 7.05                        |
| ---                        | up         | 1.55        | 3.92E-03 | chr15(+):12286809-12289732   | UCSC      | ---                                       | ---                                  | AK046972                     | ---                       | ---                   | 7.03                | 7.66                        |
| Naip6 // Naip7             | up         | 1.55        | 3.16E-02 | chr13(-):101051035-101087630 | UCSC      | NLR family, apoptosis                     | Birc1f // Birc1g // Naip-rs4 // Naip | AF135494                     | 17952                     | ENSMUSG00000078942    | 8.93                | 9.56                        |
| Ern1                       | up         | 1.55        | 4.18E-02 | chr1(-):106213544-106349169  | UCSC      | endoplasmic reticulum                     | 9030414B18Rik // Ire1a // Ire1alc    | BC156947                     | 78943                     | ENSMUSG000000020715   | 9.24                | 9.88                        |
| Mapk7                      | up         | 1.55        | 4.49E-02 | chr11(-):61302314-61307741   | UCSC      | mitogen-activated protein kinase          | bigMAPkinase1 // BMK1 // ERK5        | BC033598                     | 29939                     | ENSMUSG000000010134   | 8.48                | 9.11                        |
| Lpar4                      | up         | 1.54        | 1.28E-02 | chrX(+):104115974-104127826  | UCSC      | lysophosphatic acid                       | 5730485F04Rik // Gpr23 // LPA4a      | BC052178                     | 78134                     | ENSMUSG000000049928   | 6.42                | 7.04                        |
| Klfh18                     | up         | 1.54        | 3.23E-02 | chr9(-):110328431-110379198  | UCSC      | kelch-like 18 (Drosophila)                | MGC:36415                            | AK173029                     | 270201                    | ENSMUSG000000054792   | 8.97                | 9.59                        |
| ---                        | up         | 1.54        | 3.73E-02 | chr9(-):30996839-31004373    | UCSC      | scavenger receptor class B type 1         | SR-BI                                | AK139891                     | ---                       | ---                   | 7.19                | 7.82                        |
| Scarb2                     | up         | 1.54        | 4.40E-02 | chr5(-):92870335-92934667    | UCSC      | scavenger receptor class B type 2         | SR-BII                               | AK149102                     | 12492                     | ENSMUSG000000028426   | 8.72                | 9.34                        |
| Cldn12                     | up         | 1.54        | 4.16E-02 | chr5(-):55051111-5514873     | UCSC      | claudin 12                                | ---                                  | BC024057                     | 64945                     | ENSMUSG000000046798   | 7.06                | 7.68                        |
| ---                        | up         | 1.54        | 9.18E-04 | chr5(+):140797574-140799798  | UCSC      | ---                                       | ---                                  | AK033884                     | ---                       | ---                   | 7.19                | 7.82                        |
| ---                        | up         | 1.54        | 4.81E-02 | chr5(+):34938989-34941762    | UCSC      | ---                                       | ---                                  | AK137996                     | ---                       | ---                   | 7.39                | 8.02                        |
| ---                        | up         | 1.54        | 1.54E-03 | chr4(+):154939967-154943551  | UCSC      | ---                                       | ---                                  | AK049013                     | ---                       | ---                   | 7.65                | 8.27                        |
| CD101                      | up         | 1.54        | 3.26E-02 | chr3(-):100797588-100833418  | UCSC      | CD101 antigen                             | lgsf2 // LOC381460                   | AM849329                     | 630146                    | ENSMUSG000000086564   | 7.12                | 7.75                        |
| ---                        | up         | 1.54        | 3.24E-02 | chr3(-):78939643-78942394    | UCSC      | ---                                       | ---                                  | AK086153                     | ---                       | ---                   | 6.44                | 7.07                        |
| ---                        | up         | 1.54        | 1.51E-02 | chr1(-):36418467-36420462    | UCSC      | ---                                       | ---                                  | AK054094                     | ---                       | ---                   | 7.66                | 8.29                        |
| Dopey2                     | up         | 1.54        | 9.32E-03 | chr16(+):93712174-93810835   | UCSC      | dopey family member                       | 0610038M01Rik // 2610510B01R         | AK147255                     | 70028                     | ENSMUSG000000022946   | 8.51                | 9.14                        |
| Tram2                      | up         | 1.54        | 1.24E-02 | chr1(-):20991460-21069307    | UCSC      | translocating chain-associated            | C330003D03Rik // MGC:25725           | BC018212                     | 170829                    | ENSMUSG000000041779   | 9.92                | 10.55                       |
| Tmem71                     | up         | 1.54        | 3.82E-03 | chr15(+):66357774-66392609   | UCSC      | transmembrane protein                     | ---                                  | AK088711                     | 213068                    | ENSMUSG000000036944   | 9.44                | 10.06                       |
| ---                        | up         | 1.54        | 6.10E-03 | chr1(+):195107465-195110037  | UCSC      | ---                                       | ---                                  | AK031988                     | ---                       | ---                   | 8.98                | 9.61                        |
| D930049A15Rik              | up         | 1.54        | 9.26E-03 | chr14(-):26077009-26280615   | UCSC      | RIKEN cDNA D93004                         | ---                                  | AK086741                     | ---                       | ENSMUSG000000087536   | 7.67                | 8.30                        |
| ---                        | up         | 1.54        | 1.03E-02 | chr14(+):17130724-17140838   | UCSC      | ---                                       | ---                                  | AK078789                     | ---                       | ---                   | 7.81                | 8.44                        |
| Serpinc1                   | up         | 1.54        | 3.70E-02 | chr1(+):16290877-162933141   | UCSC      | serine (or cysteine) proteinase inhibitor | antithrombin // At-3 // At3 // ATIII | BC019447                     | 11905                     | ENSMUSG000000026715   | 6.72                | 7.34                        |
| Dapk1                      | up         | 1.54        | 3.06E-02 | chr13(+):6070313-60864551    | UCSC      | death associated protein 1                | 2310039H24Rik // 2810425C21R         | BC060161                     | 69635                     | ENSMUSG000000021559   | 7.13                | 7.76                        |
| 7175 // lgh-1a // lgh-6 // | up         | 1.54        | 1.91E-02 | chr12(-):114493110-117232532 | UCSC      | expressed sequence                        | 1181006O09Rik // B1H12 // BAH        | AK007826                     | 80795 // 380809 // 434609 | 0000076641 // ENSMUSG | 11.07               | 11.70                       |
| ---                        | up         | 1.54        | 2.63E-02 | chr12(-):52756546-52760009   | UCSC      | ---                                       | ---                                  | AK042046                     | ---                       | ---                   | 7.47                | 8.09                        |
| Adipor1                    | up         | 1.54        | 3.27E-02 | chr1(+):136312031-13632925   | UCSC      | adiponectin receptor                      | 2810031L11Rik                        | AK143680                     | 72674                     | ENSMUSG000000026457   | 10.51               | 11.13                       |
| ---                        | up         | 1.54        | 2.68E-03 | chr10(-):119718296-119719255 | UCSC      | ---                                       | ---                                  | AK076735                     | ---                       | ---                   | 7.21                | 7.83                        |
| F830004M19Rik              | up         | 1.53        | 3.67E-02 | chr8(-):89389399-89393422    | UCSC      | RIKEN cDNA F830004                        | ---                                  | AK089612                     | ---                       | ---                   | 7.19                | 7.80                        |
| Klfh2                      | up         | 1.53        | 4.13E-02 | chr8(-):67218472-67373822    | UCSC      | kelch-like 2, Mayven                      | 6030041N21Rik // ABP-KELCH           | AK220570                     | 77113                     | ENSMUSG000000031605   | 7.26                | 7.87                        |
| Fhl1                       | up         | 1.53        | 1.71E-02 | chr7(+):52713315-52715214    | UCSC      | ferritin light chain 1                    | Flt // L-ferritin                    | AK089847                     | 14325                     | ENSMUSG000000050708   | 9.70                | 10.31                       |
| ---                        | up         | 1.53        | 1.20E-02 | chr6(+):124915638-124918080  | UCSC      | ---                                       | ---                                  | AK158836                     | ---                       | ---                   | 6.31                | 6.92                        |
| ---                        | up         | 1.53        | 4.65E-02 | chr4(+):149947626-149948645  | UCSC      | ---                                       | ---                                  | AK077776                     | ---                       | ---                   | 8.61                | 9.22                        |
| ---                        | up         | 1.53        | 1.51E-02 | chr4(+):132715449-132717930  | UCSC      | ---                                       | ---                                  | AK038218                     | ---                       | ---                   | 8.11                | 8.72                        |
| Il6ra                      | up         | 1.53        | 4.38E-02 | chr3(-):88537959-89717119    | UCSC      | interleukin 6 receptor                    | CD126 // IL-6R // IL-6receptoralpha  | X51976                       | 16194                     | ENSMUSG000000027947   | 9.88                | 10.50                       |
| Cox4i2                     | up         | 1.53        | 2.12E-02 | chr2(+):152579909-152590773  | UCSC      | cytochrome c oxidase                      | Cox4b // CoxIV-2                     | AF271382                     | 84682                     | ENSMUSG00000009876    | 7.79                | 8.41                        |
| ---                        | up         | 1.53        | 1.41E-02 | chr2(+):131318142-131319023  | UCSC      | ---                                       | ---                                  | AK086876                     | ---                       | ---                   | 8.62                | 9.24                        |
| Il1f6                      | up         | 1.53        | 2.13E-02 | chr2(+):24070937-24081221    | UCSC      | interleukin 1 family, member 6            | IL1 // Fil1epsilon // IL-1H1         | AK004061                     | 54448                     | ENSMUSG000000026984   | 7.07                | 7.68                        |
| ---                        | up         | 1.53        | 4.62E-02 | chr18(-):10164047-10166553   | UCSC      | ---                                       | ---                                  | AK034190                     | ---                       | ---                   | 8.10                | 8.71                        |
| Nkfbiz                     | up         | 1.53        | 6.20E-03 | chr16(-):55811488-55839012   | UCSC      | nuclear factor of kappa-light-chain       | Mail                                 | AB020974                     | 80859                     | ENSMUSG000000035356   | 10.15               | 10.76                       |
| ---                        | up         | 1.53        | 2.31E-02 | chr16(+):93532631-93534278   | UCSC      | ---                                       | ---                                  | AK133433                     | ---                       | ---                   | 7.54                | 8.15                        |
| 9530001J02Rik              | up         | 1.53        | 1.08E-02 | chr15(+):77665619-77667263   | UCSC      | RIKEN cDNA 9530001                        | ---                                  | AK091710                     | ---                       | ---                   | 8.31                | 8.96                        |
| ---                        | up         | 1.53        | 9.27E-03 | chr15(+):6556394-6557469     | UCSC      | ---                                       | ---                                  | AK079993                     | ---                       | ---                   | 8.35                | 8.96                        |
| ---                        | up         | 1.53        | 1.28E-02 | chr13(-):97955748-97958492   | UCSC      | ---                                       | ---                                  | AK138569                     | ---                       | ---                   | 7.42                | 8.03                        |
| Syne2                      | up         | 1.53        | 1.13E-02 | chr12(+):77132601-77211887   | UCSC      | synaptic nuclear envelope                 | 6820443O08Rik // D12Erat777e         | BC076568                     | 319565                    | ENSMUSG000000063450   | 7.71                | 8.32                        |
| Tmc6                       | up         | 1.53        | 4.01E-02 | chr1(-):117627300-117641954  | UCSC      | transmembrane channel related             | D11Erd204e // EVER1                  | AK090179                     | 217353                    | ENSMUSG000000025572   | 9.74                | 10.36                       |
| Znrf3                      | up         | 1.53        | 3.10E-02 | chr11(-):5178605-5281744     | UCSC      | zinc and ring finger 3                    | LOC382477                            | BC151083                     | 407821                    | ENSMUSG000000041961   | 8.44                | 9.06                        |
| ---                        | up         | 1.53        | 7.30E-03 | chr11(+):77860487-77861858   | UCSC      | ---                                       | ---                                  | AK143021                     | ---                       | ---                   | 7.58                | 8.20                        |
| Kcnq1ot1                   | up         | 1.52        | 3.72E-03 | chr7(-):150485092-150486286  | UCSC      | KCNQ1 overlapping transcript              | Kvltq1-as // Lit1                    | AK135351                     | ---                       | ---                   | 6.30                | 6.90                        |
| ---                        | up         | 1.52        | 5.48E-03 | chr7(-):135552482-135554507  | UCSC      | ---                                       | ---                                  | AK079512                     | ---                       | ---                   | 6.55                | 7.15                        |
| Cln3                       | up         | 1.52        | 3.14E-02 | chr7(-):133714721-133729332  | UCSC      | ceroid lipofuscinosis, battenin           | ---                                  | AK134036                     | 12752                     | ENSMUSG000000030720   | 9.34                | 9.95                        |
| Cyp2s1                     | up         | 1.52        | 3.46E-02 | chr7(-):26587490-26601933    | UCSC      | cytochrome P450, family 2                 | 1200011C15Rik                        | AK162947                     | 74134                     | ENSMUSG000000040703   | 7.67                | 8.28                        |
| Dmpk                       | up         | 1.52        | 1.37E-02 | chr7(+):1968219-19679168     | UCSC      | dystrophia myotonica                      | DM // Dm15                           | BC036615                     | 13400                     | ENSMUSG000000030409   | 7.67                | 8.27                        |
| ---                        | up         | 1.52        | 3.42E-02 | chr6(-):3283194-3296071      | UCSC      | ---                                       | ---                                  | AK035387                     | ---                       | ---                   | 8.69                | 9.30                        |
| ---                        | up         | 1.52        | 3.91E-02 | chr6(+):120650428-120655206  | UCSC      | ---                                       | ---                                  | AK143075                     | ---                       | ---                   | 6.14                | 6.75                        |
| Tpcn1                      | up         | 1.52        | 2.28E-03 | chr5(-):120984167-121038683  | UCSC      | two pore channel 1                        | 5730403B01Rik                        | AK148129                     | 252972                    | ENSMUSG000000032741   | 8.60                | 9.21                        |
| Klf3                       | up         | 1.52        | 2.62E-03 | chr5(+):65194627-65221368    | UCSC      | Kruppel-like factor 3                     | 89930027G08Rik // BKLf // Tef-2      | AK157576                     | 16599                     | ENSMUSG000000029178   | 10.04               | 10.65                       |
| Gm568                      | up         | 1.52        | 1.44E-03 | chr4(-):47021191-47023653    | UCSC      | predicted gene 568                        | LOC230143                            | BC028561                     | ---                       | ---                   | 7.78                | 8.38                        |
| Sirpa                      | up         | 1.52        | 4.08E-02 | chr2(+):129418573-129457959  | UCSC      | signal-regulatory protein                 | Bit // CD172a // P84 // Ptpns1 // S  | AK159617                     | 19261                     | ENSMUSG000000037902   | 11.75               | 12.35                       |
| Snap23                     | up         | 1.52        | 2.05E-02 | chr2(+):120393406-120426458  | UCSC      | synaptosomal-associated                   | SNAP-23 // Snd1 // Syndet            | AK091962                     | 20619                     | ENSMUSG000000027287   | 10.21               | 10.81                       |
| Lypdbb                     | up         | 1.52        | 2.79E-02 | chr2(+):49643206-49804366    | UCSC      | LY6/PLAUR domain containing               | 2310010M24Rik                        | AK009282                     | 71897                     | ENSMUSG000000026765   | 6.65                | 7.25                        |
| Pnma1                      | up         | 1.52        | 3.37E-02 | chr12(+):85487082-85489442   | UCSC      | paraneoplastic antigen                    | 5730402C15Rik                        | AK136933                     | 70481                     | ENSMUSG000000054383   | 7.09                | 7.70                        |
| Pstpip1                    | up         | 1.51        | 2.09E-02 | chr9(+):55937779-55976683    | UCSC      | proline-serine-threonine phosphatase      | CD2BP1 // dsf-2                      | AK088150                     | 19200                     | ENSMUSG000000032322   | 9.31                | 9.91                        |
| Rarbip10                   | up         | 1.51        | 1.22E-02 | chr6(+):10829210-108361251   | UCSC      | RAN binding protein                       | 1443247M03Rik                        | AK337514                     | 74334                     | ENSMUSG000000037415   | 9.08                | 9.67                        |
| Hgsnat                     | up         | 1.51        | 4.79E-02 | chr8(+):27054926-27087220    | UCSC      | heparan-alpha-glucosaminyltransferase     | 9430010M12Rik // D8Erat354e          | AK035264                     | 52120                     | ENSMUSG000000032260   | 8.11                | 8.71                        |
| Ypel3                      | up         | 1.51        | 5.28E-03 | chr7(+):133920488-133924023  | UCSC      | yyype-like 3 (Drosophila)                 | 0610043B10Rik // 1190001G19R         | AK003371                     | 66090                     | ENSMUSG000000042755   | 10.25               | 10.85                       |
| Sam9l                      | up         | 1.51        | 2.90E-02 | chr6(-):322260-3349573       | UCSC      | sterile alpha motif domain                | ESTM25                               | BC079894                     | 209086                    | ENSMUSG000000047673   | 9.13                | 9.73                        |
| Tatbr3                     | up         | 1.51        | 4.8      |                              |           |                                           |                                      |                              |                           |                       |                     |                             |

Supplementary Table S1. List of the 997 Regulated Genes of AML mice treated with ABT-737(Fold-change ≥ 1.5; P-Value ≤ 0.05); 764 upregulated and 233 downregulated genes.

GEO Accession No.: GSE48601

| Gene Symbol   | Regulation | Fold-Change | P-Value  | Gene Coordinates (hg19)      | UCSC Link            | Gene Name                  | Aliases and Synonyms              | Representative Transcript ID | Entrez Gene ID | Ensembl ID         | Intensity NRAS-BCL2 | Intensity NRAS-BCL2 ABT-737 |
|---------------|------------|-------------|----------|------------------------------|----------------------|----------------------------|-----------------------------------|------------------------------|----------------|--------------------|---------------------|-----------------------------|
| Cxcl3         | up         | 1.50        | 4.95E-02 | chr5(+):151178302-151178911  | <a href="#">UCSC</a> | chemokine (C-X-C motif)    | ---                               | AK051303                     | ---            | ---                | 7.35                | 7.93                        |
| ---           | up         | 1.50        | 2.55E-02 | chr5(+):91215125-91217116    | <a href="#">UCSC</a> | chemokine (C-X-C motif)    | ---                               | AK143069                     | 330122         | ENSMUSG0000029379  | 6.21                | 6.79                        |
| ---           | up         | 1.50        | 1.47E-02 | chr5(+):32439289-32442017    | <a href="#">UCSC</a> | chemokine (C-X-C motif)    | ---                               | AK143311                     | ---            | ---                | 8.76                | 9.34                        |
| ---           | up         | 1.50        | 4.85E-02 | chr1(-):93848570-93850207    | <a href="#">UCSC</a> | chemokine (C-X-C motif)    | ---                               | AK143069                     | ---            | ---                | 6.84                | 7.43                        |
| Ly6c2         | up         | 1.50        | 2.54E-02 | chr15(+):74938988-74942243   | <a href="#">UCSC</a> | lymphocyte antigen 6       | ---                               | D88232                       | 100041546      | ENSMUSG0000022584  | 12.78               | 13.37                       |
| 1700112E06Rik | up         | 1.50        | 2.99E-02 | chr14(+):23396948-23418490   | <a href="#">UCSC</a> | RIKEN cDNA 1700112         | 2700009F18Rik                     | AK012226                     | 76633          | ENSMUSG00000063458 | 7.31                | 7.90                        |
| ---           | up         | 1.50        | 1.10E-03 | chr11(+):85533350-85534384   | <a href="#">UCSC</a> | chemokine (C-X-C motif)    | ---                               | AK086099                     | ---            | ---                | 6.31                | 6.90                        |
| Nfic          | up         | 1.50        | 4.32E-02 | chr10(-):80858936-80893883   | <a href="#">UCSC</a> | nuclear factor I/C         | 1110019L22Rik // 1500041O16R      | AK147496                     | 18029          | ENSMUSG00000079936 | 8.31                | 8.90                        |
| S1pr3         | down       | 2.99        | 2.34E-02 | chr13(+):51504130-51518166   | <a href="#">UCSC</a> | sphingosine 1-phosph       | Edg3 // LPb3 // S1P3              | AK084944                     | 13610          | ENSMUSG00000067586 | 11.04               | 9.46                        |
| ---           | down       | 2.81        | 4.62E-02 | chr17(+):89045477-89047197   | <a href="#">UCSC</a> | chemokine (C-X-C motif)    | ---                               | AK078720                     | ---            | ---                | 8.43                | 6.94                        |
| Hs3st1        | down       | 2.74        | 2.03E-02 | chr5(-):40005174-40146714    | <a href="#">UCSC</a> | heparan sulfate (gluc3-O-S | T // D5Wsu110e                    | AF019385                     | 15476          | ENSMUSG00000051022 | 9.27                | 7.82                        |
| Gpr171        | down       | 2.73        | 2.29E-02 | chr3(-):58895802-58905744    | <a href="#">UCSC</a> | G protein-coupled rec      | F730001G15Rik // H963             | AK154964                     | 229323         | ENSMUSG00000050075 | 10.94               | 9.50                        |
| Zc3h12c       | down       | 2.89        | 4.27E-02 | chr9(-):51923490-51934770    | <a href="#">UCSC</a> | zinc finger CCH type       | C230027N18Rik                     | AK220416                     | 244871         | ENSMUSG00000035164 | 9.93                | 8.50                        |
| Rab30         | down       | 2.59        | 4.56E-02 | chr7(+):99890216-99898626    | <a href="#">UCSC</a> | RAB30, member RAS          | S033421K01Rik                     | AK142206                     | 75985          | ENSMUSG00000030643 | 9.90                | 8.53                        |
| ---           | down       | 2.43        | 2.04E-03 | chr10(+):32359637-32359292   | <a href="#">UCSC</a> | chemokine (C-C motif)      | Cmkbr6                            | AK093986                     | ---            | ---                | 6.46                | 5.18                        |
| Ccr6          | down       | 2.37        | 2.40E-02 | chr17(+):8429077-8449992     | <a href="#">UCSC</a> | chemokine (C-C motif)      | chemokine (C-C motif)             | AK016031                     | ---            | ---                | 9.11                | 7.86                        |
| Plkb          | down       | 2.33        | 4.00E-02 | chr10(+):57351781-57460918   | <a href="#">UCSC</a> | protein kinase inhibi      | PKIbeta // Prkac2                 | AK156950                     | 18768          | ENSMUSG00000019876 | 9.01                | 7.79                        |
| Serpinb6b     | down       | 2.32        | 3.18E-03 | chr13(+):33057312-33070931   | <a href="#">UCSC</a> | serine (or cysteine) pe    | NK13 // ovalbumin // Spi12        | AK078753                     | 25078          | ENSMUSG00000042942 | 9.39                | 8.18                        |
| 2310074N15Rik | down       | 2.30        | 1.49E-02 | chr5(+):23953724-23954302    | <a href="#">UCSC</a> | RIKEN cDNA 2310074         | ---                               | AK010155                     | ---            | ---                | 7.55                | 6.35                        |
| Olfr313       | down       | 2.30        | 2.33E-02 | chr11(+):58630430-58631503   | <a href="#">UCSC</a> | olfactory receptor 313     | GA_x6K02T2NKP-590035-589          | BC120742                     | 265829         | ENSMUSG00000070438 | 7.17                | 5.97                        |
| 5730405O12Rik | down       | 2.25        | 4.76E-02 | chr11(-):5655010-5658302     | <a href="#">UCSC</a> | RIKEN cDNA 5730405         | ---                               | AK053288                     | ---            | ---                | 7.09                | 5.92                        |
| 9530001D17Rik | down       | 2.23        | 1.06E-03 | chr13(+):54843313-54843693   | <a href="#">UCSC</a> | RIKEN cDNA 9530001         | ---                               | AK020532                     | ---            | ---                | 6.87                | 5.71                        |
| ---           | down       | 2.20        | 3.54E-02 | chr14(-):121909725-121918335 | <a href="#">UCSC</a> | chemokine (C-X-C motif)    | ---                               | AK029385                     | ---            | ---                | 8.51                | 7.37                        |
| ---           | down       | 2.19        | 9.94E-03 | chr18(-):72333717-72334936   | <a href="#">UCSC</a> | chemokine (C-X-C motif)    | ---                               | AK043078                     | ---            | ---                | 6.92                | 5.79                        |
| Icos          | down       | 2.16        | 1.85E-02 | chr1(+):61034761-61057188    | <a href="#">UCSC</a> | inducible T-cell co-str    | ---                               | AK030827                     | 54167          | ENSMUSG00000026009 | 10.89               | 9.79                        |
| Cxcr5         | down       | 2.13        | 4.40E-02 | chr9(+):44319871-44369961    | <a href="#">UCSC</a> | chemokine (C-X-C motif)    | Blr1 // CXCR-5 // Gprc6           | AK133064                     | 12145          | ENSMUSG00000047880 | 10.77               | 9.68                        |
| ---           | down       | 2.13        | 8.30E-04 | chr3(+):58902452-58903248    | <a href="#">UCSC</a> | chemokine (C-X-C motif)    | ---                               | AK155223                     | ---            | ---                | 7.51                | 6.42                        |
| Cd83          | down       | 2.12        | 3.42E-02 | chr13(+):43880511-43898501   | <a href="#">UCSC</a> | CD83 antigen               | ---                               | AK075888                     | 12522          | ENSMUSG00000015396 | 10.66               | 9.58                        |
| Olfr313       | down       | 2.11        | 1.81E-02 | chr7(-):109861969-109862925  | <a href="#">UCSC</a> | olfactory receptor 33      | GA_x6K02T2PB9J-5431102-543        | BC104111                     | 18332          | ENSMUSG00000068273 | 6.41                | 5.33                        |
| Cabcl1        | down       | 2.10        | 1.71E-02 | chr1(-):182095369-182126099  | <a href="#">UCSC</a> | chaperone, ABC1 acti       | 4632432J16Rik // mKIAA0451        | AK014605                     | 67426          | ENSMUSG00000026489 | 9.82                | 8.75                        |
| Myc           | down       | 2.08        | 3.89E-02 | chr15(+):61816913-61821907   | <a href="#">UCSC</a> | myelocytomatosis onc       | bHLHe39 // c-myc // Myc2 // Nlar  | AK145084                     | 17869          | ENSMUSG00000022346 | 11.87               | 10.81                       |
| Hsph1         | down       | 2.06        | 3.80E-02 | chr5(-):150416862-150438871  | <a href="#">UCSC</a> | heat shock 105kDa/1        | Hsp-E71 // Hsp105 // HSP110       | AK083179                     | 15505          | ENSMUSG00000029657 | 9.38                | 8.33                        |
| Olfr1166      | down       | 2.05        | 2.34E-02 | chr2(-):87963521-87965150    | <a href="#">UCSC</a> | olfactory receptor 116     | GA_x6K02T2Q125-49616865-45        | BC051250                     | 258644         | ENSMUSG00000075135 | 6.50                | 5.46                        |
| Rln3          | down       | 2.04        | 4.58E-02 | chr8(-):86566966-86568878    | <a href="#">UCSC</a> | relaxin 3                  | M3                                | AB076565                     | 212108         | ENSMUSG00000045232 | 9.56                | 8.53                        |
| ---           | down       | 2.02        | 1.85E-02 | chr13(+):118708308-118710328 | <a href="#">UCSC</a> | chemokine (C-X-C motif)    | ---                               | AK139282                     | ---            | ---                | 6.67                | 5.65                        |
| ---           | down       | 1.99        | 3.40E-02 | chr8(-):61200466-61204149    | <a href="#">UCSC</a> | chemokine (C-X-C motif)    | ---                               | AK148743                     | ---            | ---                | 7.35                | 6.36                        |
| ---           | down       | 1.97        | 2.86E-02 | chr6(+):105994916-105997435  | <a href="#">UCSC</a> | chemokine (C-X-C motif)    | ---                               | AK141062                     | ---            | ---                | 6.75                | 5.77                        |
| Olfr1248      | down       | 1.97        | 4.99E-02 | chr2(+):89457325-89458405    | <a href="#">UCSC</a> | olfactory receptor 124     | GA_x6K02T2Q125-51059648-5         | BC150718                     | 258787         | ENSMUSG00000075080 | 6.68                | 5.71                        |
| Bcar3         | down       | 1.96        | 3.94E-02 | chr3(+):121957052-12233098   | <a href="#">UCSC</a> | breast cancer anti-est     | AND-34                            | AK015763                     | 29815          | ENSMUSG00000028121 | 10.17               | 9.20                        |
| 5730408A14Rik | down       | 1.95        | 1.84E-02 | chr1(-):177308984-177310808  | <a href="#">UCSC</a> | RIKEN cDNA 5730408         | ---                               | AK017519                     | ---            | ---                | 6.51                | 5.54                        |
| 4833403J16Rik | down       | 1.94        | 4.82E-02 | chr6(+):48705337-48706367    | <a href="#">UCSC</a> | RIKEN cDNA 4833403         | ---                               | AK014653                     | ---            | ---                | 8.70                | 7.74                        |
| Cxcl13        | down       | 1.93        | 2.49E-02 | chr5(+):96385943-96390087    | <a href="#">UCSC</a> | chemokine (C-X-C motif)    | ANGIE2 // BCA-1 // BLC // Scyb1   | AK160241                     | 55985          | ENSMUSG00000023078 | 7.37                | 6.42                        |
| 4930535E02Rik | down       | 1.93        | 1.66E-03 | chr3(-):68563831-68565357    | <a href="#">UCSC</a> | RIKEN cDNA 4930535         | ---                               | AK015977                     | ---            | ---                | 7.80                | 6.85                        |
| Pxdn          | down       | 1.92        | 5.58E-03 | chr12(+):30622473-30702522   | <a href="#">UCSC</a> | peroxidase homolog         | 2310075M15Rik // mKIAA0230        | AK122223                     | 69675          | ENSMUSG00000020674 | 7.70                | 6.75                        |
| Maf           | down       | 1.91        | 1.88E-02 | chr8(-):118225335-118228975  | <a href="#">UCSC</a> | avian musculoaponeu        | 2810401A20Rik // A230108G15F      | AK033026                     | 17132          | ENSMUSG00000055435 | 7.49                | 6.56                        |
| ---           | down       | 1.90        | 2.59E-02 | chrX(-):23952318-23954569    | <a href="#">UCSC</a> | chemokine (C-X-C motif)    | ---                               | AK157457                     | ---            | ---                | 6.78                | 5.86                        |
| 3110037C07Rik | down       | 1.90        | 3.36E-02 | chr3(+):19211657-19213735    | <a href="#">UCSC</a> | RIKEN cDNA 3110037         | ---                               | AK014131                     | ---            | ---                | 7.75                | 6.82                        |
| Tnfrsf9       | down       | 1.89        | 2.83E-02 | chr4(+):150294297-150320204  | <a href="#">UCSC</a> | tumor necrosis factor      | 4-1BB // A930040I11Rik // Cdl3    | AK019885                     | 21942          | ENSMUSG00000028966 | 7.92                | 7.40                        |
| Btla          | down       | 1.88        | 3.87E-02 | chr1(+):45224447-452253003   | <a href="#">UCSC</a> | B and T lymphocyte a       | ---                               | AK041334                     | 208154         | ENSMUSG00000052013 | 8.90                | 8.99                        |
| Nop16         | down       | 1.88        | 5.84E-04 | chr13(+):54685552-54691436   | <a href="#">UCSC</a> | NOP16 nucleolar prot       | D13Wsu177e                        | AK013251                     | 28126          | ENSMUSG00000025699 | 10.35               | 9.43                        |
| Angptl2       | down       | 1.87        | 4.57E-02 | chr2(+):33071480-33103234    | <a href="#">UCSC</a> | angiopoietin-like 2        | Arp2                              | AK155464                     | 26360          | ENSMUSG00000004105 | 8.98                | 8.09                        |
| Actg2         | down       | 1.86        | 3.74E-02 | chr6(-):83462904-83486226    | <a href="#">UCSC</a> | actin, gamma 2, smoo       | Act-4 // Act4 // ACTA3 // SMGA    | BC020242                     | 11468          | ENSMUSG00000059430 | 6.85                | 5.95                        |
| ---           | down       | 1.86        | 3.66E-03 | chr16(-):46154902-46155020   | <a href="#">UCSC</a> | chemokine (C-X-C motif)    | ---                               | AK188373                     | ---            | ---                | 11.65               | 10.75                       |
| Rhox4g        | down       | 1.85        | 4.98E-02 | chrX(-):35061008-35065834    | <a href="#">UCSC</a> | reproductive homeob        | Rhox4.7                           | AJ972671                     | 664608         | ENSMUSG00000079628 | 8.48                | 7.59                        |
| 4930504C09Rik | down       | 1.85        | 2.08E-02 | chr15(+):69100961-69105150   | <a href="#">UCSC</a> | RIKEN cDNA 4930504         | ---                               | AK015695                     | ---            | ---                | 7.83                | 6.94                        |
| Irf5          | down       | 1.82        | 4.25E-02 | chr4(+):88481429-88481998    | <a href="#">UCSC</a> | interferon alpha 5         | Irf5                              | BC120911                     | 15968          | ENSMUSG00000076440 | 7.12                | 6.25                        |
| 3110031N09Rik | down       | 1.81        | 4.92E-02 | chr5(-):69947796-69948121    | <a href="#">UCSC</a> | RIKEN cDNA 3110031         | ---                               | AK014107                     | ---            | ---                | 7.68                | 6.82                        |
| Tmem97        | down       | 1.81        | 3.88E-02 | chr11(-):78355320-78364249   | <a href="#">UCSC</a> | transmembrane prote        | 1810014L12Rik // D11Bhm182e       | AK155107                     | 69071          | ENSMUSG00000037278 | 9.15                | 8.29                        |
| Fam43a        | down       | 1.80        | 1.06E-02 | chr16(+):30601567-30602810   | <a href="#">UCSC</a> | family with sequence       | ---                               | BC026202                     | 224093         | ENSMUSG00000046546 | 9.44                | 8.59                        |
| ---           | down       | 1.80        | 1.09E-02 | chr13(+):52182876-52192038   | <a href="#">UCSC</a> | chemokine (C-X-C motif)    | ---                               | AK029687                     | ---            | ---                | 7.93                | 7.08                        |
| Gm10911       | down       | 1.79        | 4.86E-02 | chr7(-):96536854-96539833    | <a href="#">UCSC</a> | predicted gene 10911       | ---                               | AK085394                     | ---            | ---                | 8.48                | 7.64                        |
| ---           | down       | 1.79        | 1.55E-02 | chr10(+):36461152-36463155   | <a href="#">UCSC</a> | chemokine (C-X-C motif)    | ---                               | AK082216                     | ---            | ---                | 6.24                | 5.40                        |
| ---           | down       | 1.79        | 2.76E-02 | chr4(-):81191980-81192790    | <a href="#">UCSC</a> | chemokine (C-X-C motif)    | ---                               | AK047382                     | ---            | ---                | 7.70                | 6.86                        |
| ---           | down       | 1.79        | 1.29E-02 | chr18(-):46395138-46397350   | <a href="#">UCSC</a> | chemokine (C-X-C motif)    | ---                               | AK131923                     | ---            | ---                | 8.60                | 7.76                        |
| Hsp1d1        | down       | 1.79        | 4.22E-03 | chr1(-):55134679-55144728    | <a href="#">UCSC</a> | heat shock protein 1       | (Hsp60                            | AK146831                     | 15510          | ENSMUSG00000025980 | 10.42               | 9.58                        |
| Rlip2         | down       | 1.78        | 2.36E-02 | chr5(-):124913276-124928377  | <a href="#">UCSC</a> | Rab interacting lysoso     | MGC:7036                          | AK133760                     | 80291          | ENSMUSG00000029401 | 10.30               | 9.47                        |
| Olfr987       | down       | 1.78        | 3.18E-02 | chr2(-):85171054-85172128    | <a href="#">UCSC</a> | olfactory receptor 987     | GA_x6K02T2Q125-46808500-46        | BC147166                     | 257951         | ENSMUSG00000075223 | 8.59                | 7.76                        |
| Gm16489       | down       | 1.78        | 3.32E-02 | chr17(+):51989564-51991838   | <a href="#">UCSC</a> | predicted gene 16489       | ---                               | BC026389                     | ---            | ---                | 6.80                | 5.97                        |
| Frla          | down       | 1.76        | 1.07E-02 | chr1(-):172847706-172857714  | <a href="#">UCSC</a> | Fc receptor-like A         | FCRL1 // Fcrr // FREB // Freb1 // | AK172370                     | 98752          | ENSMUSG00000038421 | 10.64               | 9.82                        |
| ---           | down       | 1.76        | 2.76E-02 | chr3(+):8923932-8929974      | <a href="#">UCSC</a> | chemokine (C-X-C motif)    | ---                               | AK219344                     | ---            | ---                | 7.05                | 6.23                        |
| Zoch18        | down       | 1.75        | 2.89E-02 | chrX(+):133527715-133533011  |                      |                            |                                   |                              |                |                    |                     |                             |

Supplementary Table S1. List of the 997 Regulated Genes of AML mice treated with ABT-737(Fold-change  $\geq 1.5$ ; P-Value  $\leq 0.05$ ); 764 upregulated and 233 downregulated genes.

GEO Accession No.: GSE48601

| Gene Symbol   | Regulation | Fold-Change | P-Value  | Gene Coordinates (hg19)      | UCSC Link | Gene Name               | Aliases and Synonyms                | Representative Transcript ID | Entrez Gene ID     | Ensembl ID          | Intensity NRAS-BCL2 | Intensity NRAS-BCL2 ABT-737 |
|---------------|------------|-------------|----------|------------------------------|-----------|-------------------------|-------------------------------------|------------------------------|--------------------|---------------------|---------------------|-----------------------------|
| Tsc2d21       | down       | 1.71        | 3.99E-02 | chr14(+):7681478-76807569    | UCSC      | TSC22 domain family     | Egr5 // Tgfb14 // TSC-22            | AK173322                     | 21807              | ENSMUSG00000022010  | 8.59                | 7.81                        |
| ---           | down       | 1.70        | 2.63E-02 | chr10(+):116343825-116344080 | UCSC      | ---                     | ---                                 | AK216866                     | ---                | ---                 | 6.36                | 5.60                        |
| Olfrl143      | down       | 1.70        | 6.84E-03 | chr2(+):87642536-87643734    | UCSC      | olfactory receptor 114  | GA_x6K02T2Q125-49303473-49          | BC140202                     | 265290             | ENSMUSG00000069815  | 6.66                | 5.89                        |
| Apex1         | down       | 1.70        | 2.42E-02 | chr14(+):51544653-51546813   | UCSC      | apurinic/apyrimidinic   | HAF1 // Ref-1                       | BC052401                     | 11792              | ENSMUSG00000035960  | 10.04               | 9.27                        |
| Raf2          | down       | 1.69        | 1.22E-02 | chr10(+):38936828-38965844   | UCSC      | ribosome production     | Z31047Kc21Rik // Bxdct1             | 672293                       | ---                | ENSMUSG000000385110 | 8.75                | 8.00                        |
| Cd3eap        | down       | 1.69        | 2.83E-02 | chr7(+):19942217-19944805    | UCSC      | CD3E antigen, epsilon   | 2610103M17Rik // Ase1 // PAF4       | BC071199                     | 70333              | ENSMUSG000000047649 | 8.57                | 7.81                        |
| ---           | down       | 1.69        | 3.33E-02 | chr7(+):126726521-126727849  | UCSC      | ---                     | ---                                 | ---                          | ---                | ---                 | 6.08                | 5.32                        |
| Ahcy          | down       | 1.69        | 7.64E-03 | chr2(-):15488050-154900193   | UCSC      | S-adenosylhomocyste     | CuBP // SAHH                        | BC086781                     | 269378             | ENSMUSG00000027597  | 10.16               | 9.40                        |
| Set           | down       | 1.69        | 2.25E-02 | chr2(+):29917372-29928089    | UCSC      | SET translocation       | 2610030F17Rik // 5730420M11F        | AK172327                     | 56086              | ENSMUSG000000054766 | 9.40                | 8.64                        |
| ---           | down       | 1.69        | 3.11E-02 | chr16(+):72159192-72160483   | UCSC      | ---                     | ---                                 | AK081909                     | ---                | ---                 | 6.98                | 6.22                        |
| Bdh1          | down       | 1.69        | 6.12E-03 | chr16(+):31422380-31458986   | UCSC      | 3-hydroxybutyrate de    | 2310032J20Rik // Bdh                | BC043683                     | 71911              | ENSMUSG00000046598  | 8.51                | 7.75                        |
| ---           | down       | 1.69        | 4.89E-02 | chr15(+):100693467-100695147 | UCSC      | ---                     | ---                                 | AK084403                     | ---                | ---                 | 6.30                | 5.54                        |
| Hoxa9         | down       | 1.68        | 3.76E-04 | chr6(-):52173099-52177369    | UCSC      | homeobox A9             | D6a9 // Hox-1.7                     | AB005457                     | 15405              | ENSMUSG00000038227  | 7.62                | 6.88                        |
| Unc119b       | down       | 1.68        | 4.69E-02 | chr5(-):115572572-115584985  | UCSC      | unc-119 homolog B (C    | ---                                 | AK082614                     | 106840             | ENSMUSG00000046562  | 9.01                | 8.26                        |
| ---           | down       | 1.68        | 1.97E-02 | chr15(+):36067976-36070141   | UCSC      | ---                     | ---                                 | AK158239                     | ---                | ---                 | 7.07                | 6.32                        |
| Frmf7         | down       | 1.67        | 5.00E-02 | chrX(+):48245822-48248799    | UCSC      | FERM domain contain     | EG666849 // LOC385354               | AK032347                     | ---                | ENSMUSG00000036131  | 6.60                | 5.86                        |
| ---           | down       | 1.66        | 3.30E-02 | chr8(-):17151623-17155670    | UCSC      | ---                     | ---                                 | AK148894                     | ---                | ---                 | 9.54                | 8.81                        |
| Ruvb1         | down       | 1.66        | 1.69E-02 | chr6(+):88415424-88447566    | UCSC      | RuvB-like protein 1     | 2510009G06Rik // Pontin52 // Tr     | AK146374                     | 56505              | ENSMUSG00000030079  | 9.58                | 8.85                        |
| Cct6a         | down       | 1.66        | 2.61E-02 | chr5(+):130297889-130300376  | UCSC      | chaperonin containing   | Cct6 // Cctz-1 // chaperoninonta    | AK200859                     | 12466              | ENSMUSG00000029447  | 10.97               | 10.25                       |
| Pcgl6         | down       | 1.66        | 2.09E-02 | chr19(-):47108109-47125398   | UCSC      | polycomb group ring     | 4493340A11Rik // MBLR // Mel1       | AK155067                     | 71041              | ENSMUSG000000205050 | 9.95                | 9.01                        |
| ---           | down       | 1.66        | 2.40E-02 | chr17(+):75643757-75645635   | UCSC      | ---                     | ---                                 | AK036790                     | ---                | ---                 | 6.40                | 5.67                        |
| B3gnt5        | down       | 1.66        | 1.33E-02 | chr16(+):19760299-19772548   | UCSC      | UDP-GlcNAc:betaGal      | ---                                 | AK083839                     | 108105             | ENSMUSG00000022686  | 10.24               | 9.50                        |
| Dkc1          | down       | 1.65        | 8.95E-04 | chrX(+):72341445-72355114    | UCSC      | dyskeratosis congenit   | ---                                 | AK167973                     | 245474             | ENSMUSG000000031403 | 9.38                | 8.66                        |
| ---           | down       | 1.65        | 2.79E-02 | chr9(+):119768969-119770373  | UCSC      | ---                     | ---                                 | AK145378                     | ---                | ---                 | 7.15                | 6.43                        |
| ---           | down       | 1.65        | 4.00E-02 | chr6(+):11637151-11638324    | UCSC      | ---                     | ---                                 | AK086930                     | ---                | ---                 | 7.14                | 6.42                        |
| Snrp2         | down       | 1.65        | 4.01E-02 | chr7(+):19735187-19738076    | UCSC      | small nuclear ribonuc   | 1810009A06Rik // SMD2               | BC043014                     | 107686             | ENSMUSG00000040824  | 10.07               | 9.34                        |
| 1700047O18Rik | down       | 1.65        | 2.1E-02  | chr7(+):13366209-13366951    | UCSC      | RIKEN cDNA 1700047      | ---                                 | AK006720                     | ---                | ---                 | 7.28                | 6.55                        |
| Pol4          | down       | 1.65        | 1.36E-02 | chr6(+):82571851-82602871    | UCSC      | polymerase (DNA-dir     | 2400007P05Rik // 5830430F06R        | AK145365                     | 66979              | ENSMUSG00000030042  | 9.00                | 8.28                        |
| Cd38          | down       | 1.65        | 1.27E-02 | chr5(+):44280048-44303613    | UCSC      | CD38 antigen            | Cd38-rs1                            | AK038439                     | 12494              | ENSMUSG00000029084  | 11.86               | 11.14                       |
| Ccdc112       | down       | 1.65        | 1.03E-02 | chr18(-):46441819-46442848   | UCSC      | coiled-coil domain cor  | 8430438M01Rik                       | AK018477                     | 240261             | ENSMUSG00000079668  | 6.33                | 5.60                        |
| ---           | down       | 1.65        | 2.56E-02 | chr14(-):40106542-40110301   | UCSC      | ---                     | ---                                 | AK049684                     | ---                | ---                 | 6.68                | 5.96                        |
| Mcm5          | down       | 1.64        | 2.31E-02 | chr5(+):77633427-77652004    | UCSC      | minichromosome main     | Cdc46 // mCD46 // Mcm5d             | AK033196                     | 17218              | ENSMUSG00000005410  | 10.78               | 10.07                       |
| Fam185a       | down       | 1.64        | 1.98E-02 | chr5(+):20930776-20987942    | UCSC      | family with sequence    | ---                                 | AK030922                     | 330050             | ENSMUSG00000047221  | 7.98                | 7.27                        |
| A730015C16Rik | down       | 1.64        | 3.57E-02 | chr4(-):108520004-108521224  | UCSC      | RIKEN cDNA A73001       | ---                                 | AK042682                     | ---                | ---                 | 7.77                | 7.06                        |
| Tomn5         | down       | 1.64        | 3.89E-02 | chr4(-):45118087-45120981    | UCSC      | translocase of outer m  | 1110019J04Rik                       | AK003822                     | 68512              | ENSMUSG00000078713  | 10.06               | 9.35                        |
| Cct3          | down       | 1.64        | 1.20E-02 | chr3(+):88101044-88125688    | UCSC      | chaperonin containing   | Cctg // Tcpl-rs3 // Tric-P5         | AK146360                     | 12462              | ENSMUSG00000001416  | 10.01               | 9.29                        |
| Gm2447        | down       | 1.64        | 3.91E-05 | chr3(+):52536455-52580578    | UCSC      | predicted gene 2447     | ---                                 | AK140707                     | ---                | ---                 | 8.99                | 7.38                        |
| Gdf5          | down       | 1.64        | 2.22E-02 | chr2(-):155672779-1556770791 | UCSC      | growth differentiation  | fbp // bnp // cartilage-derivedmorp | AK259848                     | 100039832          | ENSMUSG00000038259  | 7.38                | 6.66                        |
| C030024C20Rik | down       | 1.64        | 2.20E-02 | chr16(+):38533200-38533735   | UCSC      | RIKEN cDNA C03002       | ---                                 | AK021101                     | ---                | ---                 | 7.10                | 6.38                        |
| ---           | down       | 1.64        | 2.01E-02 | chr13(-):32792703-32794504   | UCSC      | ---                     | ---                                 | AK033351                     | ---                | ---                 | 7.37                | 6.65                        |
| 4930511J24Rik | down       | 1.64        | 2.54E-03 | chr12(+):111149993-111151728 | UCSC      | RIKEN cDNA 493051       | ---                                 | AK015759                     | ---                | ---                 | 7.20                | 6.48                        |
| Chordc1       | down       | 1.63        | 4.23E-02 | chr9(+):18096710-18119259    | UCSC      | cysteine and histidin   | 1110001O09Rik // Chp-1 // morg      | AK132696                     | 66917              | ENSMUSG00000001774  | 9.86                | 9.16                        |
| Tas2r102      | down       | 1.63        | 7.20E-04 | chr6(+):132712148-132713202  | UCSC      | taste receptor, type 2  | mGR02 // mt2r5 // STC9-7 // Ta      | BC165964                     | 387339             | ENSMUSG00000056901  | 7.08                | 6.38                        |
| Gm10069       | down       | 1.63        | 5.08E-03 | chr6(+):12838873-128453298   | UCSC      | predicted gene 10069    | ---                                 | BC091771                     | ---                | ---                 | 7.37                | 6.67                        |
| Ptprcap       | down       | 1.63        | 8.20E-03 | chr19(+):4156448-41567113    | UCSC      | protein tyrosine phosph | CD-45-AP // LSM-1                   | AK088334                     | 19265              | ENSMUSG00000045826  | 10.55               | 9.84                        |
| Zfp361        | down       | 1.63        | 4.94E-02 | chr12(-):81208747-81214001   | UCSC      | zinc finger protein 36  | Brl1 // cMG1 // D530020L18Rik //    | AK051035                     | 12192              | ENSMUSG00000021127  | 10.76               | 10.05                       |
| Tm61a         | down       | 1.63        | 2.49E-02 | chr12(+):112916344-112922113 | UCSC      | IRNA methyltransferase  | E720458F09Rik                       | AK032824                     | 328162             | ENSMUSG00000060950  | 8.40                | 7.69                        |
| ---           | down       | 1.63        | 2.25E-02 | chr12(+):7394768-7396438     | UCSC      | ---                     | ---                                 | AK131455                     | ---                | ---                 | 6.55                | 5.85                        |
| Olfrl157      | down       | 1.62        | 1.70E-02 | chr4(+):43847693-43849386    | UCSC      | olfactory receptor 157  | GA_x6K02T2N78b-16110014-16          | BC137812                     | 100040268          | ENSMUSG000000059101 | 6.81                | 6.11                        |
| Psat1         | down       | 1.62        | 2.01E-02 | chr19(-):15979617-15999550   | UCSC      | phosphoserine aminot    | D8rtd814e // EPIP // PSA            | AK032487                     | 107272             | ENSMUSG00000024640  | 10.25               | 9.56                        |
| 1700019N12Rik | down       | 1.62        | 1.62E-02 | chr19(+):6996675-6997479     | UCSC      | RIKEN cDNA 170001       | A430107B04Rik                       | AK020779                     | 67077              | ENSMUSG00000050623  | 6.70                | 6.01                        |
| Olfrl173      | down       | 1.62        | 8.06E-03 | chr16(-):58796575-58797738   | UCSC      | olfactory receptor 173  | GA_x54KRFKPG5P-54960233-5           | BC137837                     | 259002             | ENSMUSG00000049362  | 6.45                | 5.75                        |
| C1qbp         | down       | 1.62        | 4.82E-02 | chr11(-):70791309-70796518   | UCSC      | complement compone      | D111Wsu182e // HAF1 // P32          | AK010746                     | 12261              | ENSMUSG00000018446  | 10.02               | 9.32                        |
| 4930588G05Rik | down       | 1.62        | 8.50E-03 | chr10(-):104961096-104963416 | UCSC      | RIKEN cDNA 493058       | ---                                 | AK019832                     | ---                | ---                 | 6.99                | 6.30                        |
| ---           | down       | 1.61        | 3.14E-02 | chr8(-):120313239-120315411  | UCSC      | ---                     | ---                                 | AK038009                     | ---                | ---                 | 7.05                | 6.36                        |
| Spr2k         | down       | 1.61        | 1.30E-02 | chr3(+):92236518-92237673    | UCSC      | small proline-rich prot | ---                                 | BC116688                     | 20765              | ENSMUSG00000054215  | 6.24                | 5.55                        |
| Ppid          | down       | 1.61        | 1.29E-02 | chr3(+):79395262-79407571    | UCSC      | peptidyl prolyl isomera | 4930564J03Rik // cyclophilin40 //   | AK151091                     | 67738              | ENSMUSG00000027804  | 7.63                | 6.94                        |
| ---           | down       | 1.61        | 1.83E-02 | chr14(-):122335859-122338388 | UCSC      | ---                     | ---                                 | AK154231                     | ---                | ---                 | 8.57                | 7.89                        |
| Gpr18         | down       | 1.61        | 3.94E-02 | chr14(-):122310475-122315069 | UCSC      | G protein-coupled rec   | ---                                 | AK157029                     | 110168             | ENSMUSG00000050350  | 10.59               | 9.89                        |
| ---           | down       | 1.61        | 3.49E-02 | chr11(+):32590106-32591943   | UCSC      | ---                     | ---                                 | AK084253                     | ---                | ---                 | 7.07                | 6.38                        |
| ---           | down       | 1.60        | 9.98E-04 | chr9(-):29503663-29505598    | UCSC      | ---                     | ---                                 | AK159021                     | ---                | ---                 | 7.16                | 6.48                        |
| Gadd45gip1    | down       | 1.60        | 7.10E-03 | chr8(+):87356175-87359381    | UCSC      | growth arrest and DN    | 2310040G17Rik // Cri1               | AK028227                     | 102060             | ENSMUSG000000033751 | 9.42                | 8.74                        |
| Cdca7         | down       | 1.60        | 3.60E-02 | chr2(+):72314265-72324947    | UCSC      | cell division cycle ass | 2310021G01Rik // JPO1               | AK028671                     | 66953              | ENSMUSG00000055612  | 8.14                | 7.46                        |
| Hspe1         | down       | 1.60        | 2.53E-02 | chr1(+):55145161-55148150    | UCSC      | heat shock protein 1    | (Hsp10 // mitochondrialchaperonin   | AK088121                     | 15528              | ENSMUSG00000073676  | 9.83                | 9.14                        |
| Prrm5         | down       | 1.60        | 1.55E-02 | chr14(-):55126016-55136308   | UCSC      | protein arginine N-me   | Jak-bindingprotein1 // Jbp1 // Skl  | AK076346                     | 27374              | ENSMUSG00000023110  | 10.41               | 9.73                        |
| ---           | down       | 1.60        | 4.17E-02 | chr14(+):124366485-124368273 | UCSC      | ---                     | ---                                 | AK089847                     | ---                | ---                 | 7.30                | 6.62                        |
| 2310044G17Rik | down       | 1.60        | 3.14E-02 | chr12(+):88287992-88306312   | UCSC      | RIKEN cDNA 231004       | mkIAA1737                           | AK122546                     | 217732             | ENSMUSG00000034157  | 9.44                | 8.76                        |
| Nob1          | down       | 1.59        | 5.60E-03 | chr8(-):109936389-109948953  | UCSC      | NIN1/RPN12 binding      | 170002109Rik // ART-4 // Nob1       | BC103793                     | 67619              | ENSMUSG00000003848  | 9.85                | 9.18                        |
| ---           | down       | 1.59        | 1.56E-02 | chr5(-):65921346-65922819    | UCSC      | ---                     | ---                                 | AK140861                     | ---                | ---                 | 6.73                | 6.06                        |
| Cct6a         | down       | 1.59        | 3.05E-02 | chr5(+):130297889-130297434  | UCSC      | chaperonin containing   | Cct6 // Cctz-1 // chaperoninonta    | AK088705                     | 12466              | ENSMUSG00000029447  | 9.40                | 8.73                        |
| Fam92a        | down       | 1.59        | 2.30E-02 | chr4(-):12080870-12098145    | UCSC      | family with sequence    | E720467C03Rik                       | 68099                        | ENSMUSG00000028218 | 7.90                | 7.23                |                             |
| C130079B09Rik | down       | 1.59        | 3.87E-02 | chr15(+):73231193-73233604   | UCSC      | RIKEN cDNA C13007       | ---                                 | AK048576                     | ---                | ---                 | 6.96                | 6.29                        |
| ---           | down       | 1.59        | 2.01E-02 | chr11(-):94481753-94483250   |           |                         |                                     |                              |                    |                     |                     |                             |

Supplementary Table S1. List of the 997 Regulated Genes of AML mice treated with ABT-737(Fold-change ≥ 1.5; P-Value ≤ 0.05); 764 upregulated and 233 downregulated genes.

GEO Accession No.: GSE48601

| Gene Symbol   | Regulation | Fold-Change | P-Value  | Gene Coordinates (hg19)      | UCSC Link            | Gene Name                | Aliases and Synonyms                | Representative Transcript ID | Entrez Gene ID | Ensembl ID          | Intensity NRAS-BCL2 | Intensity NRAS-BCL2 ABT-737 |
|---------------|------------|-------------|----------|------------------------------|----------------------|--------------------------|-------------------------------------|------------------------------|----------------|---------------------|---------------------|-----------------------------|
| Olfr1414      | down       | 1.57        | 2.08E-03 | chr1(-):94407625-94408640    | <a href="#">UCSC</a> | olfactory receptor 141   | GA_x6K02T2RCC-81245243-8            | BC120830                     | 259041         | ENSMUSG00000042849  | 6.91                | 6.26                        |
| Dis3          | down       | 1.57        | 3.85E-02 | chr14(+):99475853-99498985   | <a href="#">UCSC</a> | DIS3 mitotic control h   | 2810028N01Rik                       | AK038313                     | 72662          | ENSMUSG00000033166  | 9.29                | 8.64                        |
| Olfr429       | down       | 1.57        | 1.58E-02 | chr1(+):176019169-176020111  | <a href="#">UCSC</a> | olfactory receptor 429   | GA_x6K02T2P20D-21090094-2           | BC127973                     | 258717         | ENSMUSG00000049528  | 7.30                | 6.65                        |
| ---           | down       | 1.57        | 1.23E-02 | chr10(-):91618596-91621875   | <a href="#">UCSC</a> | ---                      | ---                                 | AK051318                     | ---            | ---                 | 7.62                | 6.97                        |
| ---           | down       | 1.56        | 1.17E-02 | chr7(+):22558890-22560240    | <a href="#">UCSC</a> | ---                      | ---                                 | AK157641                     | ---            | ---                 | 7.59                | 6.95                        |
| Ctps          | down       | 1.56        | 4.30E-02 | chr4(-):120212471-120242882  | <a href="#">UCSC</a> | cytidine 5'-triphosphat  | ---                                 | ---                          | 51797          | ENSMUSG00000028633  | 8.30                | 7.66                        |
| ---           | down       | 1.56        | 1.67E-02 | chr3(-):20118504-20119207    | <a href="#">UCSC</a> | ---                      | ---                                 | AK136713                     | ---            | ---                 | 6.61                | 5.97                        |
| Rex4          | down       | 1.56        | 2.62E-02 | chr2(-):26809086-26819838    | <a href="#">UCSC</a> | REX4, RNA exonucle       | XPMC2H                              | BC060147                     | 227656         | ENSMUSG00000052406  | 9.45                | 8.81                        |
| ---           | down       | 1.56        | 5.82E-03 | chr17(-):93989959-93994457   | <a href="#">UCSC</a> | ---                      | ---                                 | AK156635                     | ---            | ---                 | 6.98                | 6.34                        |
| Hmg1n         | down       | 1.56        | 2.37E-02 | chr16(-):96342225-96349337   | <a href="#">UCSC</a> | high mobility group nu   | HMG-14 // Hmg14                     | AK010763                     | 15312          | ENSMUSG00000040681  | 9.47                | 8.82                        |
| ---           | down       | 1.56        | 3.90E-02 | chr12(-):40778044-40781730   | <a href="#">UCSC</a> | ---                      | ---                                 | AK143806                     | ---            | ---                 | 6.19                | 5.55                        |
| Cenpw         | down       | 1.55        | 1.54E-03 | chr10(-):29914390-29920343   | <a href="#">UCSC</a> | centromere protein W     | 2610036L11Rik                       | BC050071                     | 66311          | ENSMUSG00000075266  | 7.20                | 6.58                        |
| Slc25a4       | down       | 1.55        | 2.27E-02 | chr8(-):47292528-47296387    | <a href="#">UCSC</a> | solute carrier family 25 | adenine nucleotidetranslocase-1     | AK078077                     | 11739          | ENSMUSG00000031633  | 10.10               | 9.47                        |
| ---           | down       | 1.55        | 2.91E-02 | chr6(-):12072441-12075162    | <a href="#">UCSC</a> | ---                      | ---                                 | AK037624                     | ---            | ---                 | 6.60                | 5.96                        |
| Rpl9          | down       | 1.55        | 1.06E-02 | chr5(-):65773692-65782810    | <a href="#">UCSC</a> | ribosomal protein L9     | ---                                 | BC013185                     | ---            | ---                 | 9.88                | 9.25                        |
| Smyd2         | down       | 1.55        | 2.82E-02 | chr1(-):191704373-191746172  | <a href="#">UCSC</a> | SET and MYND doma        | 1110020E07Rik // KMT3C // Zmy       | AK150857                     | 228830         | ENSMUSG00000026603  | 8.94                | 8.31                        |
| Uck2          | down       | 1.55        | 2.95E-02 | chr1(-):169156219-169215264  | <a href="#">UCSC</a> | uridine-cytidine kinase  | TSAG03 // Umpk                      | AF236636                     | 80914          | ENSMUSG00000026558  | 11.31               | 10.67                       |
| Olfr102       | down       | 1.55        | 4.48E-02 | chr17(-):37450356-37451382   | <a href="#">UCSC</a> | olfactory receptor 102   | GA_x6K02T2PSCP-1775063-17           | BC139115                     | 258218         | ENSMUSG00000049234  | 7.09                | 6.46                        |
| ---           | down       | 1.54        | 1.86E-02 | chrM(+):9459-9804            | <a href="#">UCSC</a> | ---                      | ---                                 | AK139029                     | ---            | ---                 | 9.03                | 8.41                        |
| ---           | down       | 1.54        | 1.86E-02 | chr9(-):9224948-9226139      | <a href="#">UCSC</a> | ---                      | ---                                 | AK087344                     | ---            | ---                 | 6.95                | 6.33                        |
| Nop2          | down       | 1.54        | 2.50E-02 | chr6(+):125081927-125094770  | <a href="#">UCSC</a> | NOP2 nucleolar prote     | 120kDa // Nol1                      | AK079914                     | 110109         | ENSMUSG00000038279  | 10.02               | 8.40                        |
| Ly9           | down       | 1.54        | 1.92E-03 | chr1(-):173518763-173537541  | <a href="#">UCSC</a> | lymphocyte antigen 9     | CD229 // Lgp100 // SLAMF3 // T      | AK088815                     | 17085          | ENSMUSG00000040707  | 9.50                | 9.90                        |
| Stip1         | down       | 1.54        | 1.12E-02 | chr19(-):7095192-7114458     | <a href="#">UCSC</a> | stress-induced phosph    | Hop // Hsp70/Hsp90organizingpr      | AK088494                     | 20867          | ENSMUSG00000024966  | 10.83               | 10.21                       |
| 49305153Rik   | down       | 1.54        | 1.76E-02 | chr17(-):21937511-21938807   | <a href="#">UCSC</a> | RIKEN cDNA 493051-       | ---                                 | AK015795                     | 75098          | ENSMUSG00000049202  | 8.01                | 7.39                        |
| 493042820Rik  | down       | 1.54        | 4.89E-02 | chr16(-):689796396-69000627  | <a href="#">UCSC</a> | RIKEN cDNA 493042-       | ---                                 | AK019586                     | ---            | ---                 | 7.16                | 6.54                        |
| Yars2         | down       | 1.54        | 3.40E-02 | chr18(+):163033057-16303725  | <a href="#">UCSC</a> | tyrosyl-tRNA synthet     | 2210023C10Rik                       | AK138504                     | 70120          | ENSMUSG00000022792  | 9.16                | 8.54                        |
| 1110067D22Rik | down       | 1.54        | 1.10E-02 | chr11(+):20723358-20731239   | <a href="#">UCSC</a> | RIKEN cDNA 111006-       | ---                                 | AK165650                     | 21651          | ENSMUSG00000042363  | 9.26                | 8.64                        |
| Sms           | down       | 1.53        | 4.72E-02 | chrX(-):153881785-153930217  | <a href="#">UCSC</a> | spermine synthase        | SpmST                               | AK166665                     | 20603          | ENSMUSG000000071708 | 9.30                | 8.69                        |
| ---           | down       | 1.53        | 2.98E-02 | chrX(-):140317303-140319727  | <a href="#">UCSC</a> | ---                      | ---                                 | AK045457                     | ---            | ---                 | 7.19                | 6.58                        |
| Fam60a        | down       | 1.53        | 1.25E-02 | chr6(-):148869588-148894966  | <a href="#">UCSC</a> | family with sequence     | Ptpcs1 // Tera                      | AK145384                     | 56306          | ENSMUSG00000039885  | 10.28               | 9.67                        |
| Mbd4          | down       | 1.53        | 4.08E-02 | chr6(-):115791217-115803383  | <a href="#">UCSC</a> | methyl-CpG binding d     | Med1                                | AK161005                     | 17193          | ENSMUSG00000030322  | 8.76                | 8.15                        |
| B630006K09Rik | down       | 1.53        | 4.89E-02 | chr6(+):41517478-41520684    | <a href="#">UCSC</a> | RIKEN cDNA B63000-       | ---                                 | AK037902                     | ---            | ---                 | 6.77                | 6.16                        |
| Mcm7          | down       | 1.53        | 4.95E-02 | chr5(-):138605817-138613651  | <a href="#">UCSC</a> | minichromosome mai       | mCDC47 // Mcmd7                     | AK132748                     | 17220          | ENSMUSG00000029730  | 10.45               | 9.84                        |
| Gar1          | down       | 1.53        | 2.52E-02 | chr3(-):129527831-129534239  | <a href="#">UCSC</a> | GAR1 ribonucleoprote     | C430047J18Rik // GAR1 // Nola1      | BC048685                     | 68147          | ENSMUSG00000028010  | 8.67                | 8.05                        |
| ---           | down       | 1.53        | 9.68E-03 | chr2(+):113543305-113545587  | <a href="#">UCSC</a> | ---                      | ---                                 | AK085610                     | ---            | ---                 | 8.42                | 7.81                        |
| Mrrf          | down       | 1.53        | 2.35E-02 | chr2(+):359592173-36046169   | <a href="#">UCSC</a> | mitochondrial ribosom    | 2400002D02Rik                       | AK032371                     | 67871          | ENSMUSG00000026887  | 9.54                | 8.92                        |
| ---           | down       | 1.53        | 2.81E-02 | chr19(+):42002733-42004477   | <a href="#">UCSC</a> | ---                      | ---                                 | AK093028                     | ---            | ---                 | 7.19                | 6.57                        |
| Hells         | down       | 1.53        | 3.95E-02 | chr19(+):39005434-39042769   | <a href="#">UCSC</a> | helicase, lymphoid spe   | E130115I21Rik // LSH // Lysh //     | BC080874                     | 15201          | ENSMUSG00000025001  | 8.38                | 7.77                        |
| Mc5r          | down       | 1.53        | 3.18E-02 | chr18(+):68497250-68499377   | <a href="#">UCSC</a> | melanocortin 5 recept    | ---                                 | U08354                       | 17203          | ENSMUSG00000007480  | 7.22                | 6.61                        |
| Dmx1          | down       | 1.53        | 2.35E-02 | chr18(+):49992651-50123908   | <a href="#">UCSC</a> | Dmx-like 1               | C630007L23Rik                       | AY590892                     | 240283         | ENSMUSG00000037416  | 9.48                | 8.86                        |
| Olfr128       | down       | 1.53        | 1.89E-02 | chr17(+):38060483-38061500   | <a href="#">UCSC</a> | olfactory receptor 128   | GA_x6K02T2PSCP-2374126-23           | BC139087                     | 383243         | ENSMUSG00000059030  | 7.28                | 6.77                        |
| ---           | down       | 1.53        | 1.27E-02 | chr13(+):53124287-53130459   | <a href="#">UCSC</a> | ---                      | ---                                 | AK132507                     | ---            | ---                 | 7.35                | 6.64                        |
| Nhp2          | down       | 1.53        | 3.20E-02 | chr11(+):51433250-51437216   | <a href="#">UCSC</a> | NHP2 ribonucleoprote     | 2410130M07Rik // D11Ert175e         | AK019134                     | 52530          | ENSMUSG00000010556  | 10.32               | 9.70                        |
| Blsp2         | down       | 1.52        | 4.24E-02 | chr9(-):103327255-103382658  | <a href="#">UCSC</a> | beaded filament struct   | CP49                                | BC068172                     | 107993         | ENSMUSG00000032556  | 8.20                | 7.59                        |
| Mc1r          | down       | 1.52        | 3.46E-02 | chr8(+):125931005-125934522  | <a href="#">UCSC</a> | melanocortin 1 recept    | e // extensionrecessiveyellow // N  | AK148437                     | 17199          | ENSMUSG00000074037  | 8.86                | 8.26                        |
| Slc7a6        | down       | 1.52        | 1.56E-02 | chr8(+):108692756-108722604  | <a href="#">UCSC</a> | solute carrier family 7  | LAT-2                               | AK165629                     | 330836         | ENSMUSG00000031904  | 9.60                | 8.99                        |
| Isvn1         | down       | 1.52        | 1.36E-02 | chr8(+):73118380-73121187    | <a href="#">UCSC</a> | mvo-inositol 1-phosph    | 1300017C10Rik                       | AF238525                     | 71780          | ENSMUSG00000019139  | 10.39               | 9.78                        |
| Rplp2         | down       | 1.52        | 1.55E-02 | chr7(+):148633542-148637484  | <a href="#">UCSC</a> | ribosomal protein, lar   | 2700049I22Rik                       | AK012402                     | 67186          | ENSMUSG00000025508  | 5.77                | 5.17                        |
| Ppat          | down       | 1.52        | 4.10E-02 | chr5(-):77342274-77380597    | <a href="#">UCSC</a> | phosphoribosyl pyroph    | 5730454C12Rik // MGC-38417          | AK159859                     | 231327         | ENSMUSG00000029246  | 9.26                | 8.65                        |
| 1110001D16Rik | down       | 1.52        | 4.44E-03 | chr4(-):151306487-151306960  | <a href="#">UCSC</a> | RIKEN cDNA 111000-       | ---                                 | AK003212                     | ---            | ---                 | 7.90                | 7.30                        |
| Sf3a3         | down       | 1.52        | 4.31E-02 | chr4(+):124392060-124409704  | <a href="#">UCSC</a> | splicing factor 3a, sub  | 4930512K19Rik // 60kDa              | AK030743                     | 75062          | ENSMUSG00000028902  | 10.34               | 9.74                        |
| Nop58         | down       | 1.52        | 2.46E-02 | chr1(+):59741849-59769036    | <a href="#">UCSC</a> | NOP58 ribonucleoprom     | MSSP // Nol5 // SIKsmilarprotein    | AK044216                     | 55989          | ENSMUSG00000026200  | 9.38                | 8.78                        |
| E2f1          | down       | 1.52        | 3.06E-02 | chr2(-):154385370-154395590  | <a href="#">UCSC</a> | E2F transcription fact   | E2F-1                               | AK153968                     | 13555          | ENSMUSG00000027490  | 9.75                | 9.15                        |
| Eif1a         | down       | 1.52        | 2.22E-05 | chr18(+):46757357-46769867   | <a href="#">UCSC</a> | eukaryotic translation   | E1f1 // Eftu // eIF-1A // Eif4c     | AK019451                     | 13664          | ENSMUSG00000057561  | 9.92                | 9.32                        |
| Cenpm         | down       | 1.52        | 3.68E-02 | chr15(-):82064509-82075178   | <a href="#">UCSC</a> | centromere protein M     | 2610019I03Rik                       | AK017679                     | 66570          | ENSMUSG00000068101  | 9.45                | 8.84                        |
| Dlk1          | down       | 1.52        | 3.58E-02 | chr12(+):110691432-110701545 | <a href="#">UCSC</a> | delta-like 1 homolog (D  | Dlk1 // FA1 // Peg9 // pG2 // pref- | EU434917                     | 13386          | ENSMUSG00000040856  | 7.88                | 7.28                        |
| Timd2         | down       | 1.52        | 1.14E-02 | chr11(-):46482462-46520566   | <a href="#">UCSC</a> | T-cell immunoglobulin    | TIM-2 // Tim2                       | BC028829                     | 171284         | ENSMUSG00000040413  | 7.20                | 6.59                        |
| ---           | down       | 1.52        | 1.81E-02 | chr11(+):95590074-95592261   | <a href="#">UCSC</a> | ---                      | ---                                 | AK043141                     | ---            | ---                 | 7.34                | 6.74                        |
| Aasdhpt       | down       | 1.51        | 8.88E-03 | chr9(-):4294793-4309496      | <a href="#">UCSC</a> | aminoadipate-semiald     | 2010309J24Rik // 2810407B07R        | ---                          | 67618          | ENSMUSG00000025894  | 8.80                | 8.20                        |
| ---           | down       | 1.51        | 4.01E-02 | chr8(+):68175738-68178110    | <a href="#">UCSC</a> | ---                      | ---                                 | AK086228                     | ---            | ---                 | 7.68                | 7.08                        |
| Rps3          | down       | 1.51        | 4.76E-03 | chr7(-):106626410-106632163  | <a href="#">UCSC</a> | ribosomal protein S3     | D7Erd795e                           | AK164077                     | 27050          | ENSMUSG00000030744  | 11.98               | 11.38                       |
| Wbscr22       | down       | 1.51        | 1.83E-02 | chr5(-):135528829-135540830  | <a href="#">UCSC</a> | Williams Beuren syndr    | 1110003N24Rik                       | AK002497                     | 66138          | ENSMUSG00000005378  | 10.15               | 9.55                        |
| Srm           | down       | 1.51        | 1.00E-02 | chr4(+):147965611-147968727  | <a href="#">UCSC</a> | spermidine synthase      | SpdST // SpdSy                      | AK028359                     | 20810          | ENSMUSG00000006442  | 11.17               | 10.57                       |
| ---           | down       | 1.51        | 3.81E-02 | chr3(-):141556649-141559349  | <a href="#">UCSC</a> | ---                      | ---                                 | AK082979                     | ---            | ---                 | 6.86                | 6.27                        |
| Lbh           | down       | 1.51        | 4.77E-02 | chr7(+):73267645-73291282    | <a href="#">UCSC</a> | limb-bud and heart       | 1810009F10Rik // 6720416L16R        | BC052470                     | 77889          | ENSMUSG00000024063  | 11.12               | 10.52                       |
| Gart          | down       | 1.51        | 2.46E-02 | chr16(-):91621649-91647199   | <a href="#">UCSC</a> | phosphoribosylglycine    | Gaps // Prgs                        | AK146355                     | 14450          | ENSMUSG00000029262  | 9.79                | 9.20                        |
| Nip7          | down       | 1.50        | 4.89E-02 | chr8(+):109580777-109583145  | <a href="#">UCSC</a> | nuclear import 7 hom     | 1110017C15Rik // 6330509M23R        | AK003739                     | 66164          | ENSMUSG00000031917  | 8.27                | 7.69                        |
| ---           | down       | 1.50        | 6.90E-03 | chr7(-):141390192-141391945  | <a href="#">UCSC</a> | ---                      | ---                                 | AK038353                     | ---            | ---                 | 6.96                | 6.37                        |
| ---           | down       | 1.50        | 4.81E-02 | chr7(-):28620296-28622620    | <a href="#">UCSC</a> | ---                      | ---                                 | AK042484                     | ---            | ---                 | 7.34                | 6.75                        |
| Fkbp4         | down       | 1.50        | 3.91E-02 | chr6(-):128379556-128388675  | <a href="#">UCSC</a> | FK506 binding protein    | FKBP-52 // FKBP52                   | AK051433                     | 14228          | ENSMUSG00000030357  | 9.29                | 8.70                        |
| Wdr75         | down       | 1.50        |          |                              |                      |                          |                                     |                              |                |                     |                     |                             |
